# Supplementary material
Source: PubMed Central journal article supplement (PMC9957712)
Supplement: mmc1.pdf [file mmc1.pdf]

## Supporting Information

### ***In silico* screening of phenylethanoid glycosides, a class of pharmacologically active compounds as natural inhibitors of SARS-CoV-2 proteases**

Caio Felipe de Araújo Ribas Cheohen<sup>1,†</sup>, Maria Eduarda Alves Esteves<sup>2,†</sup>, Thamirys Silva da Fonseca<sup>3,4</sup>, Carla Monteiro Leal<sup>4</sup>, Fernanda de Lemos Fernandes Assis<sup>3</sup>, Mariana Freire Campos<sup>3,4</sup>, Raianne Soares Rebelo<sup>3</sup>, Diego Allonso<sup>3</sup>, Gilda Guimarães Leitão<sup>5</sup>, Manuela Leal da Silva<sup>1,2,\*</sup>, Suzana Guimarães Leitão<sup>3,\*</sup>

<sup>1</sup>*Programa de Pós-graduação Multicêntrico em Ciências Fisiológicas, Centro de Ciências da Saúde, Instituto de Biodiversidade e Sustentabilidade NUPEM, Universidade Federal do Rio de Janeiro, Macaé, RJ 27965-045, Brazil.*

<sup>2</sup>*Programa de Pós-graduação em Biologia Computacional e Sistemas, Instituto Oswaldo Cruz, Manginhos, Rio de Janeiro, RJ 21041-361, Brazil*

<sup>3</sup>*Faculdade de Farmácia, Centro de Ciências da Saúde, Bl. A 2º andar, Ilha do Fundão, Universidade Federal do Rio de Janeiro, Rio de Janeiro, RJ 21941-902, Brazil*

<sup>4</sup>*Programa de Pós-graduação em Biotecnologia Vegetal e Bioprocessos, Universidade Federal do Rio de Janeiro, Rio de Janeiro, RJ 21941-902, Brazil*

<sup>5</sup>*Instituto de Pesquisas de Produtos Naturais, Centro de Ciências da Saúde, Bl. H, Ilha do Fundão, Universidade Federal do Rio de Janeiro, Rio de Janeiro, RJ 21941-902, Brazil*

<sup>†</sup>these authors contributed equally to this work

\*Corresponding authors:

Suzana Guimarães Leitão: [sgleitao@pharma.ufrj.br](mailto:sgleitao@pharma.ufrj.br)

Manuela Leal da Silva: [manuela@macae.ufrj.br](mailto:manuela@macae.ufrj.br)

## Figure Summary

|                                                                                                                                                                                                                                                                                                                                         |     |
|-----------------------------------------------------------------------------------------------------------------------------------------------------------------------------------------------------------------------------------------------------------------------------------------------------------------------------------------|-----|
| <b>Figure S 1:</b> Interactions between the 3CL <sup>pro</sup> complex and PG_254 A & B: In orange, the results referring to the ChemPLP algorithm. C&D: In magenta, results referring to GoldScore. E & F: In cyan, results referring to Autodock Vina. ....                                                                           | 224 |
| <b>Figure S 2:</b> Interactions between the 3CL <sup>pro</sup> complex and PG_266 A & B: In orange, the results referring to the ChemPLP algorithm. C&D: In magenta, results referring to GoldScore. E & F: In cyan, results referring to Autodock Vina. ....                                                                           | 224 |
| <b>Figure S 3:</b> Interactions between the PL <sup>pro</sup> complex and PG_514 A & B: In orange, the results referring to the ChemPLP algorithm. C&D: In magenta, results referring to GoldScore. E & F: In cyan, results referring to Autodock Vina. ....                                                                            | 225 |
| <b>Figure S 4:</b> Interactions between the PL <sup>pro</sup> complex and PG_78 A & B: In orange, the results referring to the ChemPLP algorithm. C&D: In magenta, results referring to GoldScore. E & F: In cyan, results referring to Autodock Vina. ....                                                                             | 225 |
| <b>Figure S 5:</b> Interactions between the PL <sup>pro</sup> complex and PG_348 A & B: In orange, the results referring to the ChemPLP algorithm. C&D: In magenta, results referring to GoldScore. E & F: In cyan, results referring to Autodock Vina. ....                                                                            | 226 |
| <b>Figure S 6:</b> PG_254 modes overlay. The three-dimensional structure of 3CLpro (PDBid:6XQT) is colored in gray surface. The best modes of the PG resulted from AutoDock Vina (cyan), GOLD/GoldScore GOLD/ChemPLP (orange) simulations are in the protease active site region. On the right is the highlight structure overlay. .... | 226 |
| <b>Figure S 7:</b> PG_266 modes overlay. The three-dimensional structure of 3CLpro (PDBid:6XQT) is colored in gray surface. The best modes of the PG resulted from AutoDock Vina (cyan), GOLD/GoldScore GOLD/ChemPLP (orange) simulations are in the protease active site region. On the right is the highlight structure overlay. .... | 227 |
| <b>Figure S 8:</b> PG_493 modes overlay. The three-dimensional structure of 3CLpro (PDBid:6XQT) is colored in gray surface. The best modes of the PG resulted from AutoDock Vina (cyan), GOLD/GoldScore GOLD/ChemPLP (orange) simulations are in the protease active site region. On the right is the highlight structure overlay. .... | 227 |
| <b>Figure S 9:</b> PG_514 modes overlay. The three-dimensional structure of PLpro (PDBid: 7JRN) is colored in gray surface. The best modes of the PG resulted from AutoDock Vina (cyan), GOLD/GoldScore GOLD/ChemPLP (orange) simulations are in the BL2Loop region. On the left is the highlight structure overlay. ....               | 228 |
| <b>Figure S 10:</b> PG_78 modes overlay. The three-dimensional structure of PLpro (PDBid: 7JRN) is colored in gray surface. The best modes of the PG resulted from AutoDock Vina (cyan), GOLD/GoldScore GOLD/ChemPLP (orange) simulations are in the BL2Loop region. On the left is the highlight structure overlay. ....               | 228 |
| <b>Figure S 11:</b> PG_348 modes overlay. The three-dimensional structure of PLpro (PDBid: 7JRN) is colored in gray surface. The best modes of the PG resulted from AutoDock Vina (cyan), GOLD/GoldScore GOLD/ChemPLP (orange) simulations are in the BL2Loop region. On the left is the highlight structure overlay. ....              | 229 |
| <b>Figure S 12:</b> PG_447 modes overlay. The three-dimensional structure of PLpro (PDBid: 7JRN) is colored in gray surface. The best modes of the PG resulted from AutoDock Vina (cyan), GOLD/GoldScore GOLD/ChemPLP (orange) simulations are in the BL2Loop region. On the left is the highlight structure overlay. ....              | 229 |

## Table Summary

**Table S1:** Phenylethanoid glycoside dataset based in the four review manuscripts published between 1994 and 2020 [24, 25, 28, 23]. In the first row of the table are displayed the code numbers PG which were given for in silico analyses, followed by the trivial names (when available) in the second row. In the third row, the compounds numbers in the original references are given, together with their molecular weight. The numbering of PGs is not always continuous because duplicates were eliminated after all structures were drawn. In the original articles, some cis and trans caffeoyl derivatives received the same numbering but were considered here as different substances (examples: PG\_287-1 and PG\_287-2; PG343-1 and PG\_343-2; PG\_359-1 and PG\_359-2).<sup>4</sup>

**Table S2:** The top 80 phenylethanoid glycosides (PG) filtered by the penalty score below 0.3 against 3C1<sup>pro</sup> of SARS-CoV-2. .... 219

**Table S3:** The top 98 phenylethanoid glycosides (PG) filtered by the penalty score below 0.3 against PL<sup>pro</sup> of SARS-CoV-2. .... 221

**Table S4:** ADMETox parameters evaluated for the seven phenylethanoid glycosides (PG) that showed interaction with SARS-CoV-2 proteases predicted by SwissADME, pkCSM and DataWarrior. .... 222

**Table S1:** Phenylethanoid glycoside dataset based in the four review manuscripts published between 1994 and 2020 (26, 27, 28, 31). In the first row of the table are displayed the code numbers PG which were given for *in silico* analyses, followed by the trivial names (when available) in the second row. In the third row, the compounds numbers in the original references are given, together with their molecular weight. The numbering of PGs is not always continuous because duplicates were eliminated after all structures were drawn. In the original articles, some *cis* and *trans* caffeoyl derivatives received the same numbering but were considered here as different substances (examples: PG\_287-1 and PG\_287-2; PG343-1 and PG\_343-2; PG\_359-1 and PG\_359-2).

| Code   | Compound                                          | Reference                                     | Molecular Weight (Da) |
|--------|---------------------------------------------------|-----------------------------------------------|-----------------------|
| PG_001 | Forsythoside A (or Forsythiaside or Forsythoside) | (compound 76) – (27)<br>(compound 124) – (31) | 626.606               |
|        |                                                   |                                               |                       |
| Code   | Compound                                          | Reference                                     | Molecular Weight (Da) |
| PG_002 | Verbascoside (or acteoside or orobanchin)         | (compound 41) – (27)<br>(compound 121) – (31) | 624.59                |
|        |                                                   |                                               |                       |
| Code   | Compound                                          | Reference                                     | Molecular Weight (Da) |
| PG_003 | Isoverbascoside (or Isoacteoside)                 | (compound 54) – (27)<br>(compound 121) –      | 610.563               |



|                                                                                      |                          | (31)                  |                       |
|--------------------------------------------------------------------------------------|--------------------------|-----------------------|-----------------------|
| 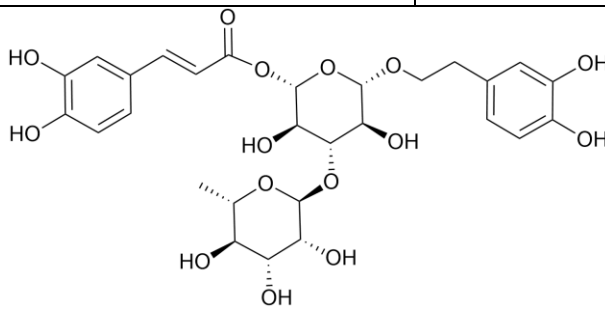   |                          |                       |                       |
| Code                                                                                 | Compound                 | Reference             | Molecular Weight (Da) |
| PG_004                                                                               | Poliumoside (Magnolidin) | (compound 128) – (27) | 770.731 Da            |
|   |                          |                       |                       |
| Code                                                                                 | Compound                 | Reference             | Molecular Weight (Da) |
| PG_005                                                                               | Lippiarubelloside A      | (compound 42) – (26)  | 786.733               |
|  |                          |                       |                       |
| Code                                                                                 | Compound                 | Reference             | Molecular Weight (Da) |
| PG_006                                                                               | Lippiarubelloside B      | (compound 43) – (26)  | 772.75                |

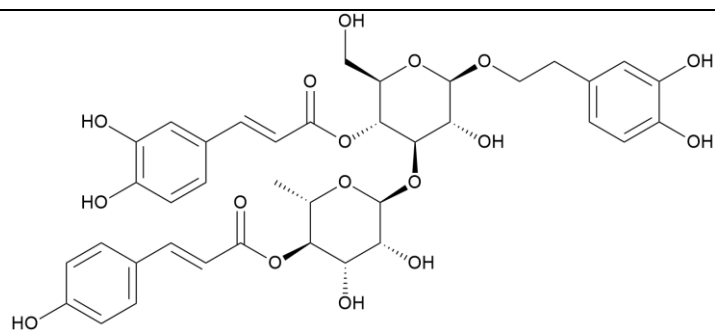

| Code   | Compound        | Reference            | Molecular Weight (Da) |
|--------|-----------------|----------------------|-----------------------|
| PG_007 | Physocalycoside | (compound 46) – (28) | 962.941               |

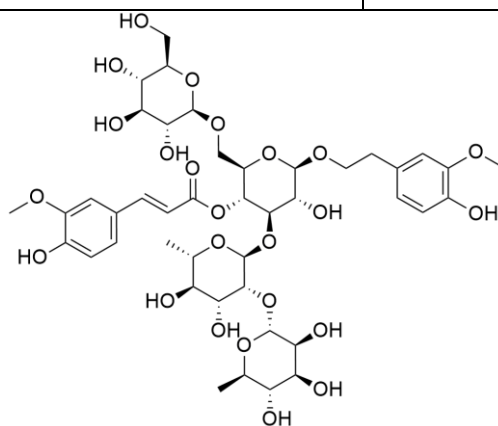

| Code   | Compound       | Reference            | Molecular Weight (Da) |
|--------|----------------|----------------------|-----------------------|
| PG_008 | Velutinoside I | (compound 36) – (28) | 920.861               |

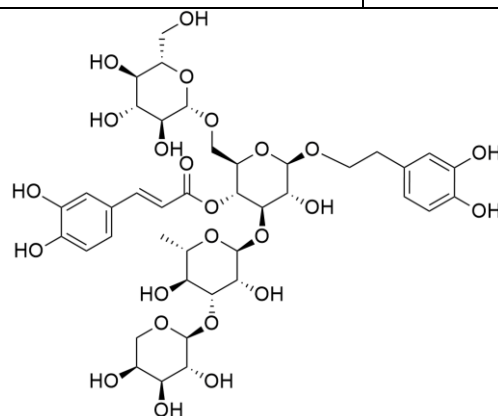

| Code | Compound | Reference | Molecular Weight (Da) |
|------|----------|-----------|-----------------------|
|      |          |           |                       |

|                                                                                      |                                                                       |                                              |                       |
|--------------------------------------------------------------------------------------|-----------------------------------------------------------------------|----------------------------------------------|-----------------------|
| PG_009                                                                               | $\beta$ -Phenethyl- $\beta$ -D-glycopyranoside                        | (compound 1) – (27)                          | 284.307               |
| 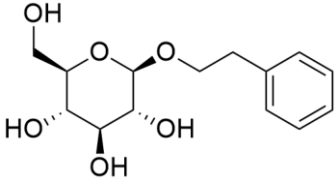   |                                                                       |                                              |                       |
| Code                                                                                 | Compound                                                              | Reference                                    | Molecular Weight (Da) |
| PG_010                                                                               | $\beta$ -3,4-Dihydroxyphenethyl- $\beta$ -d-glycopyranoside           | (compound 2) – (27)                          | 316.305               |
|    |                                                                       |                                              |                       |
| Code                                                                                 | Compound                                                              | Reference                                    | Molecular Weight (Da) |
| PG_011                                                                               | $\beta$ -4-hydroxyphenethyl-6'-O-caffeoyl- $\beta$ -D-glycopyranoside | (compound 3) – (27)                          | 462.449               |
|  |                                                                       |                                              |                       |
| Code                                                                                 | Compound                                                              | Reference                                    | Molecular Weight (Da) |
| PG_012                                                                               | Calceolariside A (Calceorioside A / desrhamnosyl acteoside)           | (compound 4) – (27)<br>(compound 127) – (31) | 478.448               |

|        |                                |                     |                       |
|--------|--------------------------------|---------------------|-----------------------|
|        |                                |                     |                       |
| Code   | Compound                       | Reference           | Molecular Weight (Da) |
| PG_013 | Calceolariside B               | (compound 5) – (27) | 480.464               |
|        |                                |                     |                       |
| Code   | Compound                       | Reference           | Molecular Weight (Da) |
| PG_014 | Eutigoside A                   | (compound 6) – (27) | 446.45                |
|        |                                |                     |                       |
| Code   | Compound                       | Reference           | Molecular Weight (Da) |
| PG_015 | Grayanoside A                  | (compound 7) – (27) | 476.476               |
|        |                                |                     |                       |
| Code   | Compound                       | Reference           | Molecular Weight (Da) |
| PG_016 | Grayanoside B (Osmanthuside E) | (compound 8) – (27) | 492.475               |
|        |                                |                     |                       |
| Code   | Compound                       | Reference           | Molecular             |

|                                                                                      |                 |                         | Weight (Da)           |
|--------------------------------------------------------------------------------------|-----------------|-------------------------|-----------------------|
| PG_017                                                                               | Neosyringalide  | (compound 9) –<br>(27)  | 462.449               |
| 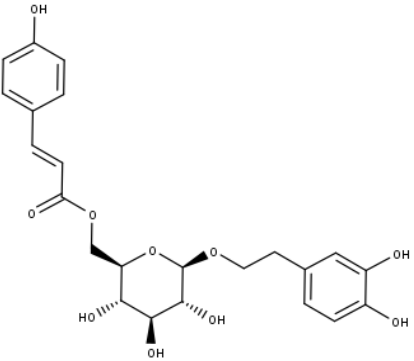   |                 |                         |                       |
| Code                                                                                 | Compound        | Reference               | Molecular Weight (Da) |
| PG_018                                                                               | Osmanthuside A  | (compound 10) –<br>(27) | 446.45                |
|  |                 |                         |                       |
| Code                                                                                 | Compound        | Reference               | Molecular Weight (Da) |
| PG_019                                                                               | Osmanthuside C  | (compound 11) –<br>(27) | 446.45                |
|  |                 |                         |                       |
| Code                                                                                 | Compound        | Reference               | Molecular Weight (Da) |
| PG_020                                                                               | Plantainoside A | (compound 12) –<br>(27) | 478.448               |

| 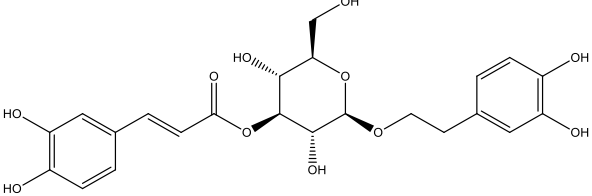   |                            |                                               |                       |
|--------------------------------------------------------------------------------------|----------------------------|-----------------------------------------------|-----------------------|
| Code                                                                                 | Compound                   | Reference                                     | Molecular Weight (Da) |
| PG_021                                                                               | Plantainoside B            | (compound 13) – (27)                          | 478.448               |
|   |                            |                                               |                       |
| Code                                                                                 | Compound                   | Reference                                     | Molecular Weight (Da) |
| PG_022                                                                               | Salidroside (Rhodioloside) | (compound 14) – (27)<br>(compound 123) – (31) | 300.306               |
|  |                            |                                               |                       |
| Code                                                                                 | Compound                   | Reference                                     | Molecular Weight (Da) |
| PG_023                                                                               | 6'-O-Galloyl salidroside   | (compound 15) – (27)                          | 452.411               |

| 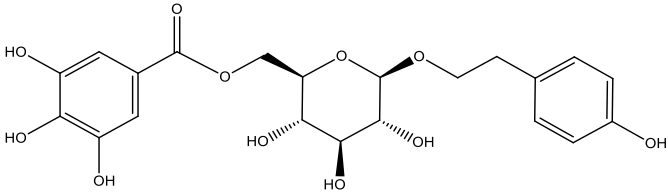   |                                |                      |                       |
|--------------------------------------------------------------------------------------|--------------------------------|----------------------|-----------------------|
| Code                                                                                 | Compound                       | Reference            | Molecular Weight (Da) |
| PG_024                                                                               | 3'-O-Galloyl salidroside       | (compound 16) – (27) | 454.426               |
|    |                                |                      |                       |
| Code                                                                                 | Compound                       | Reference            | Molecular Weight (Da) |
| PG_025                                                                               | 4,6'-Di-O-galloyl salidroside  | (compound 17) – (27) | 604.515               |
|  |                                |                      |                       |
| Code                                                                                 | Compound                       | Reference            | Molecular Weight (Da) |
| PG_026                                                                               | 4',6'-Di-O-galloyl salidroside | (compound 18) – (27) | 604.515               |

| 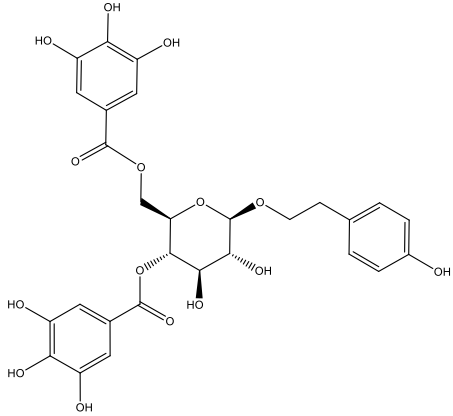   |                                         |                      |                       |
|--------------------------------------------------------------------------------------|-----------------------------------------|----------------------|-----------------------|
| Code                                                                                 | Compound                                | Reference            | Molecular Weight (Da) |
| PG_027                                                                               | 3',4',6'-Tri-O-galloyl salidoside       | (compound 19) – (27) | 756.62                |
|   |                                         |                      |                       |
| Code                                                                                 | Compound                                | Reference            | Molecular Weight (Da) |
| PG_028                                                                               | 2',3',4',6'- Tetra-O-galloyl salidoside | (compound 20) – (27) | 908.725               |
|  |                                         |                      |                       |
| Code                                                                                 | Compound                                | Reference            | Molecular Weight (Da) |



|        |                                                                            |                      |                       |
|--------|----------------------------------------------------------------------------|----------------------|-----------------------|
| PG_029 | 2',3'- di- O- galloyl- 4',6'-(S)-hexahydroxydiphenoyl salidroside          | (compound 21) – (27) | 906.709               |
|        |                                                                            |                      |                       |
| Code   | Compound                                                                   | Reference            | Molecular Weight (Da) |
| PG_030 | 3'-O-Galloyl-4',6'-(S)-hexahydroxydiphenoyl salidroside                    | (compound 22) – (27) | 754.604               |
|        |                                                                            |                      |                       |
| Code   | Compound                                                                   | Reference            | Molecular Weight (Da) |
| PG_031 | $\beta$ -3,4-Dihydroxyphenethyl- $\beta$ -D-(6'-O-galloyl)-glucopyranoside | (compound 23) – (27) | 468.41                |
|        |                                                                            |                      |                       |
| Code   | Compound                                                                   | Reference            | Molecular Weight (Da) |

|        |                   |                             |                       |
|--------|-------------------|-----------------------------|-----------------------|
| PG_032 | Syringalide A     | (24) – Jimenez et al., 1994 | 462.449               |
|        |                   |                             |                       |
| Code   | Compound          | Reference                   | Molecular Weight (Da) |
| PG_033 | Syringalide B     | (compound 25) – (27)        | 476.476               |
|        |                   |                             |                       |
| Code   | Compound          | Reference                   | Molecular Weight (Da) |
| PG_034 | Syringalide C     | (compound 26) – (27)        | 492.475               |
|        |                   |                             |                       |
| Code   | Compound          | Reference                   | Molecular Weight (Da) |
| PG_035 | Calceolarioside D | (compound 27) – (27)        | 478.448               |
|        |                   |                             |                       |
| Code   | Compound          | Reference                   | Molecular Weight (Da) |

|                                                                                      |              |                         |                       |
|--------------------------------------------------------------------------------------|--------------|-------------------------|-----------------------|
| PG_036                                                                               | Cornoside    | (compound 28) –<br>(27) | 316.305               |
| 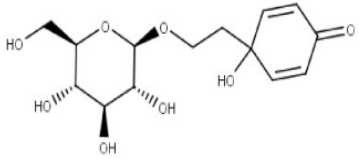   |              |                         |                       |
| Code                                                                                 | Compound     | Reference               | Molecular Weight (Da) |
| PG_037                                                                               | Eutigoside B | (compound 29) –<br>(27) | 462.449               |
|    |              |                         |                       |
| Code                                                                                 | Compound     | Reference               | Molecular Weight (Da) |
| PG_038                                                                               | Eutigoside C | (compound 30) –<br>(27) | 446.45                |
|  |              |                         |                       |
| Code                                                                                 | Compound     | Reference               | Molecular Weight (Da) |
| PG_039                                                                               | Rengyoside A | (compound 31) –<br>(27) | 322.352               |
|  |              |                         |                       |

| Code                                                                                 | Compound     | Reference            | Molecular Weight (Da) |
|--------------------------------------------------------------------------------------|--------------|----------------------|-----------------------|
| PG_040                                                                               | Rengyoside B | (compound 32) – (27) | 320.337               |
| 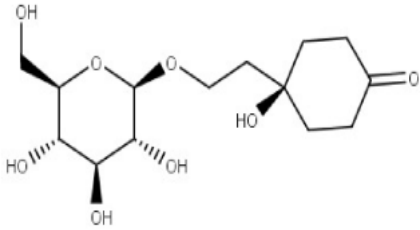   |              |                      |                       |
| Code                                                                                 | Compound     | Reference            | Molecular Weight (Da) |
| PG_041                                                                               | Rengyoside C | (compound 33) – (27) | 456.486               |
|  |              |                      |                       |
| Code                                                                                 | Compound     | Reference            | Molecular Weight (Da) |
| PG_042                                                                               | Ibotanolide  | (compound 34) – (27) | 462.449               |
|  |              |                      |                       |
| Code                                                                                 | Compound     | Reference            | Molecular Weight (Da) |

| PG_043                                                                               | De- <i>p</i> -coumaroyl ibotanolide | (compound 35) – (27) | 316.305               |
|--------------------------------------------------------------------------------------|-------------------------------------|----------------------|-----------------------|
| 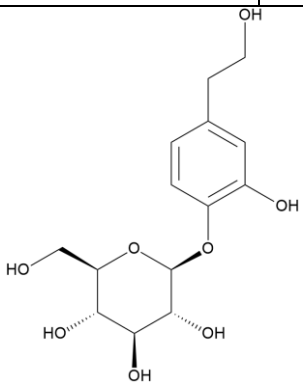   |                                     |                      |                       |
| Code                                                                                 | Compound                            | Reference            | Molecular Weight (Da) |
| PG_044                                                                               | Ibotanolide B                       | (compound 36) – (27) | 478.448               |
|   |                                     |                      |                       |
| Code                                                                                 | Compound                            | Reference            | Molecular Weight (Da) |
| PG_045                                                                               | Ibotanolide C                       | (compound 36) – (27) | 492.475               |
|  |                                     |                      |                       |
| Code                                                                                 | Compound                            | Reference            | Molecular Weight (Da) |
| PG_046                                                                               | Thalictoside                        | (compound 38) – (27) | 329.304               |
|  |                                     |                      |                       |
| Code                                                                                 | Compound                            | Reference            | Molecular Weight (Da) |
| PG_047                                                                               | 6'-O-caffeoyl thalictoside          | (compound 39) –      | 491.448               |

|                                                                                      |                       | (27)                 |                       |
|--------------------------------------------------------------------------------------|-----------------------|----------------------|-----------------------|
| 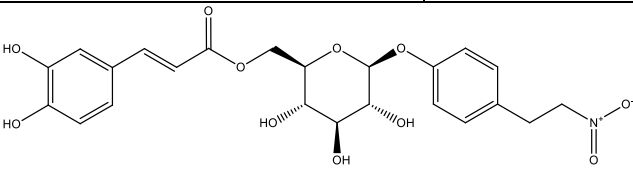   |                       |                      |                       |
| Code                                                                                 | Compound              | Reference            | Molecular Weight (Da) |
| PG_048                                                                               | 2'-O-acetyl acteoside | (compound 40) – (27) | 668.643               |
|   |                       |                      |                       |
| Code                                                                                 | Compound              | Reference            | Molecular Weight (Da) |
| PG_049                                                                               | Acteoside (Z isomer)  | (compound 42) – (27) | 624.59                |
|  |                       |                      |                       |
| Code                                                                                 | Compound              | Reference            | Molecular Weight (Da) |
| PG_050                                                                               | Brachynoside          | (compound 43) – (27) | 652.644               |

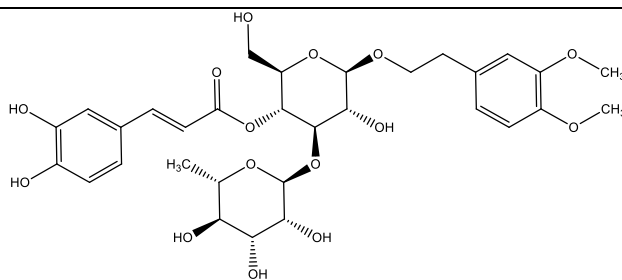

| Code   | Compound      | Reference            | Molecular Weight (Da) |
|--------|---------------|----------------------|-----------------------|
| PG_051 | Campneoside I | (compound 44) – (27) | 656.632               |

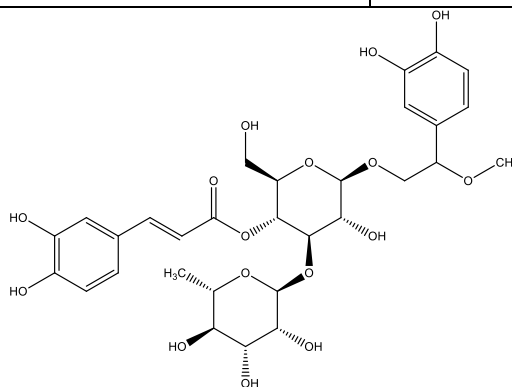

| Code   | Compound                             | Reference            | Molecular Weight (Da) |
|--------|--------------------------------------|----------------------|-----------------------|
| PG_052 | Campneoside II (β-hydroxy-acteoside) | (compound 45) – (27) | 640.589               |

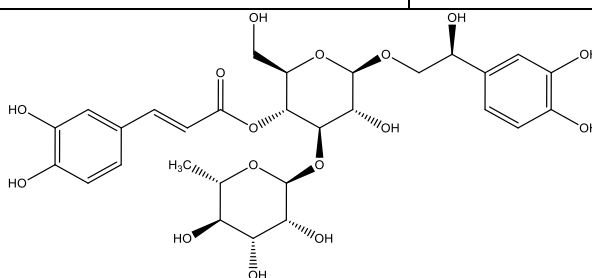

| Code   | Compound      | Reference            | Molecular Weight (Da) |
|--------|---------------|----------------------|-----------------------|
| PG_053 | Cistanoside C | (compound 46) – (27) | 638.617               |

| Code   | Compound                         | Reference            | Molecular Weight (Da) |
|--------|----------------------------------|----------------------|-----------------------|
| PG_054 | Cistanoside D ( <i>E</i> isomer) | (compound 47) – (27) | 652.644               |
|        |                                  |                      |                       |
| Code   | Compound                         | Reference            | Molecular Weight (Da) |
| PG_055 | Cistanoside D ( <i>Z</i> isomer) | (compound 48) – (27) | 654.659               |
|        |                                  |                      |                       |
| Code   | Compound                         | Reference            | Molecular Weight (Da) |
| PG_056 | Cistanoside E                    | (compound 49) – (27) | 476.473               |



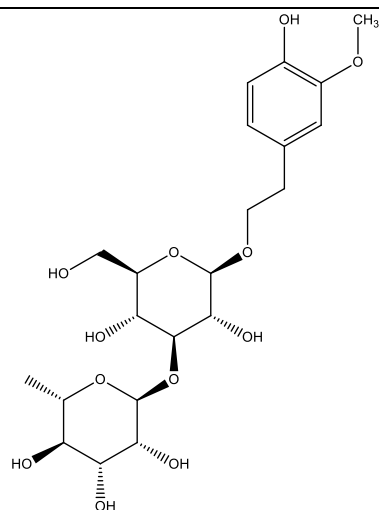

| Code   | Compound      | Reference            | Molecular Weight (Da) |
|--------|---------------|----------------------|-----------------------|
| PG_057 | Cistanoside G | (compound 50) – (27) | 446.447               |

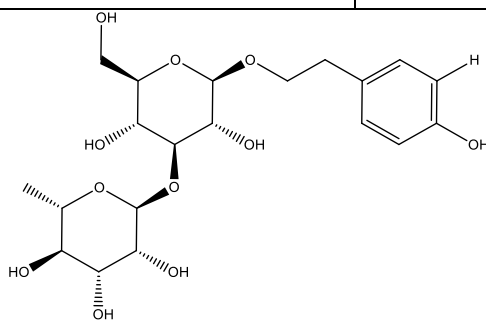

| Code   | Compound      | Reference            | Molecular Weight (Da) |
|--------|---------------|----------------------|-----------------------|
| PG_058 | Cistanoside H | (compound 51) – (27) | 504.483               |

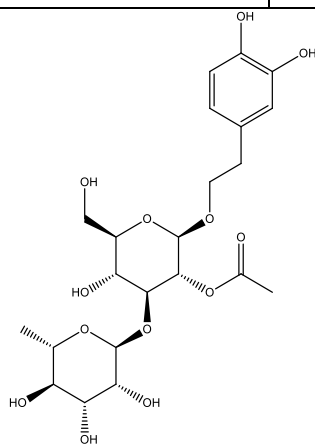

| Code | Compound | Reference | Molecular Weight (Da) |
|------|----------|-----------|-----------------------|
|      |          |           |                       |

| PG_059                                                                               | Decaffeoylacteoside | (compound 52) –<br>(27) (compound<br>134) – (31) | 462.446               |
|--------------------------------------------------------------------------------------|---------------------|--------------------------------------------------|-----------------------|
| 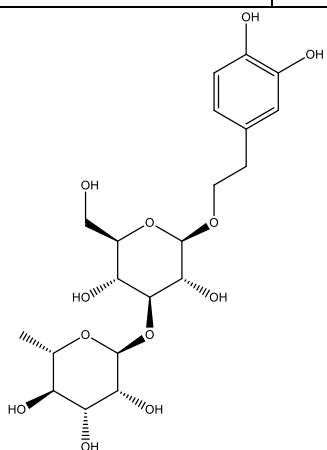   |                     |                                                  |                       |
| Code                                                                                 | Compound            | Reference                                        | Molecular Weight (Da) |
| PG_060                                                                               | Eukovoside          | (compound 53) –<br>(27)                          | 638.617               |
|   |                     |                                                  |                       |
| Code                                                                                 | Compound            | Reference                                        | Molecular Weight (Da) |
| PG_061                                                                               | Isomartynoside      | (compound 55) –<br>(27)                          | 652.644               |
|  |                     |                                                  |                       |
| Code                                                                                 | Compound            | Reference                                        | Molecular             |

|        |                                                                            |                                                   | Weight (Da)           |
|--------|----------------------------------------------------------------------------|---------------------------------------------------|-----------------------|
| PG_062 | 3'- $\alpha$ - L- rhamnopyranosyl<br>isosyringalide<br>(or Lipedoside A-I) | (compound 56) –<br>(27)<br>(compound 5) –<br>(26) | 608.591               |
|        |                                                                            |                                                   |                       |
| Code   | Compound                                                                   | Reference                                         | Molecular Weight (Da) |
| PG_063 | Jionoside C                                                                | (compound 57) –<br>(27)                           | 592.592               |
|        |                                                                            |                                                   |                       |
| Code   | Compound                                                                   | Reference                                         | Molecular Weight (Da) |
| PG_064 | Jionoside D                                                                | (compound 58) –<br>(27)                           | 638.617               |
|        |                                                                            |                                                   |                       |
| Code   | Compound                                                                   | Reference                                         | Molecular Weight (Da) |
| PG_065 | Leucosceptoside A                                                          | (compound 59) –<br>(27) (compound                 | 638.617               |

|                                                                                      |                 | 119) – (31)                               |                       |
|--------------------------------------------------------------------------------------|-----------------|-------------------------------------------|-----------------------|
| 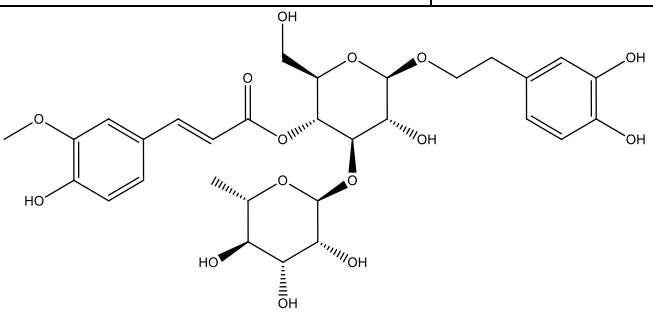   |                 |                                           |                       |
| Code                                                                                 | Compound        | Reference                                 | Molecular Weight (Da) |
| PG_066                                                                               | Martynoside     | (compound 60) – (27) (compound 74) – (28) | 652.644               |
|   |                 |                                           |                       |
| Code                                                                                 | Compound        | Reference                                 | Molecular Weight (Da) |
| PG_067                                                                               | Osmanthuside B  | (compound 61) – (27)                      | 592.592               |
|  |                 |                                           |                       |
| Code                                                                                 | Compound        | Reference                                 | Molecular Weight (Da) |
| PG_068                                                                               | Osmanthuside B6 | (compound 62) – (27)                      | 592.592               |

| 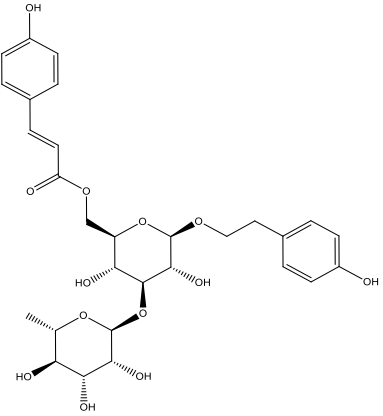   |                                           |                      |                       |
|--------------------------------------------------------------------------------------|-------------------------------------------|----------------------|-----------------------|
| Code                                                                                 | Compound                                  | Reference            | Molecular Weight (Da) |
| PG_069                                                                               | Osmanthuside D                            | (compound 63) – (27) | 592.592               |
|   |                                           |                      |                       |
| Code                                                                                 | Compound                                  | Reference            | Molecular Weight (Da) |
| PG_070                                                                               | Pedicularioside E 2''-O-acetyl rhamnoside | (compound 64) – (27) | 738.733               |
|  |                                           |                      |                       |
| Code                                                                                 | Compound                                  | Reference            | Molecular Weight (Da) |
| PG_071                                                                               | Plantainoside C                           | (compound 65) –      | 638.617               |

|        |                                               | (27)                                       |                       |
|--------|-----------------------------------------------|--------------------------------------------|-----------------------|
|        |                                               |                                            |                       |
| Code   | Compound                                      | Reference                                  | Molecular Weight (Da) |
| PG_072 | 3'- $\alpha$ -L-rhamnopyranosyl syringalide A | (compound 66) – (27)                       | 608.591               |
|        |                                               |                                            |                       |
| Code   | Compound                                      | Reference                                  | Molecular Weight (Da) |
| PG_073 | Tubuloside B                                  | (compound 67) – (27) (compound 139) – (31) | 666.627               |
|        |                                               |                                            |                       |
| Code   | Compound                                      | Reference                                  | Molecular Weight (Da) |
| PG_074 | Tubuloside E                                  | (compound 68) – (27)                       | 650.628               |

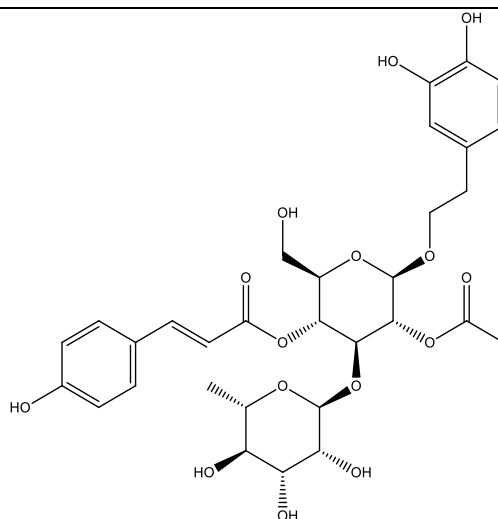

| Code   | Compound    | Reference            | Molecular Weight (Da) |
|--------|-------------|----------------------|-----------------------|
| PG_075 | Crenatoside | (compound 69) – (27) | 622.574               |

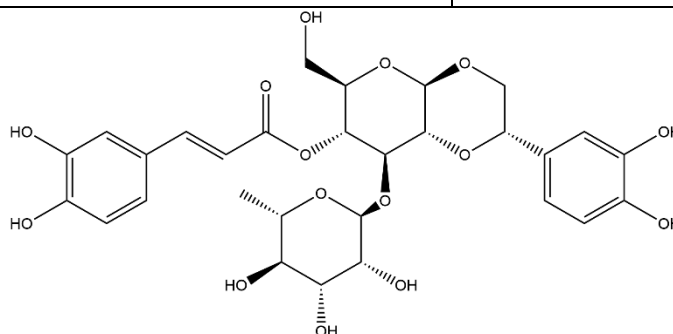

| Code   | Compound               | Reference            | Molecular Weight (Da) |
|--------|------------------------|----------------------|-----------------------|
| PG_076 | Decaffeoyl crenatoside | (compound 70) – (27) | 460.43                |

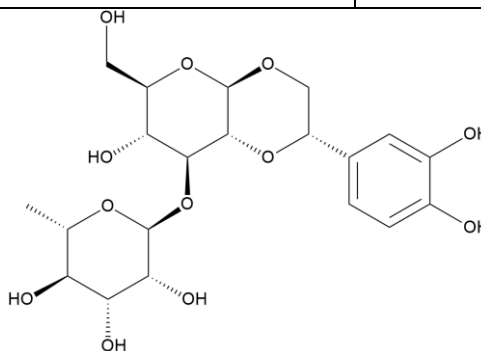

| Code   | Compound    | Reference       | Molecular Weight (Da) |
|--------|-------------|-----------------|-----------------------|
| PG_077 | 4-cinnamoyl | (compound 71) – | 576.593               |

|                                                                                      | desxyloxymussatioside | (27)                 |                       |
|--------------------------------------------------------------------------------------|-----------------------|----------------------|-----------------------|
| 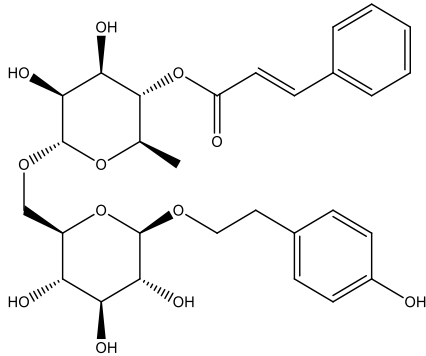   |                       |                      |                       |
| Code                                                                                 | Compound              | Reference            | Molecular Weight (Da) |
| PG_078                                                                               | Calceolarioside C     | (compound 72) – (27) | 610.563               |
|   |                       |                      |                       |
| Code                                                                                 | Compound              | Reference            | Molecular Weight (Da) |
| PG_079                                                                               | Calceolarioside E     | (compound 73) – (27) | 610.563               |
|  |                       |                      |                       |
| Code                                                                                 | Compound              | Reference            | Molecular Weight (Da) |



|                                                                                      |                |                         |                       |
|--------------------------------------------------------------------------------------|----------------|-------------------------|-----------------------|
| PG_080                                                                               | Conandroside   | (compound 74) –<br>(27) | 610.563               |
| 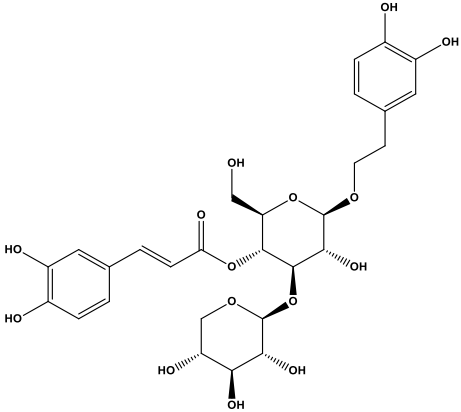   |                |                         |                       |
| Code                                                                                 | Compound       | Reference               | Molecular Weight (Da) |
| PG_081                                                                               | Cuchiloside    | (compound 75) –<br>(27) | 432.42                |
|   |                |                         |                       |
| Code                                                                                 | Compound       | Reference               | Molecular Weight (Da) |
| PG_082                                                                               | Forsythoside D | (compound 77) –<br>(27) | 478.445               |
|  |                |                         |                       |
| Code                                                                                 | Compound       | Reference               | Molecular Weight (Da) |
| PG_083                                                                               | Forsythoside E | (compound 78) –         | 462.446               |

|                                                                                      |              | (27)                 |                       |
|--------------------------------------------------------------------------------------|--------------|----------------------|-----------------------|
| 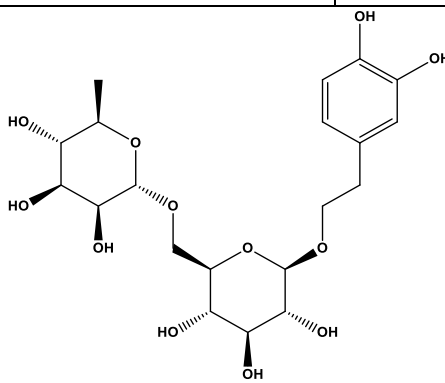   |              |                      |                       |
| Code                                                                                 | Compound     | Reference            | Molecular Weight (Da) |
| PG_084                                                                               | Hellicoside  | (compound 79) – (27) | 656.588               |
|   |              |                      |                       |
| Code                                                                                 | Compound     | Reference            | Molecular Weight (Da) |
| PG_085                                                                               | Icariside D1 | (compound 80) – (27) | 416.421               |
|  |              |                      |                       |
| Code                                                                                 | Compound     | Reference            | Molecular Weight (Da) |
| PG_086                                                                               | Lugrandoside | (compound 81) –      | 640.589               |

|                                                                                      |                                                                                      | (27)                 |                       |
|--------------------------------------------------------------------------------------|--------------------------------------------------------------------------------------|----------------------|-----------------------|
| 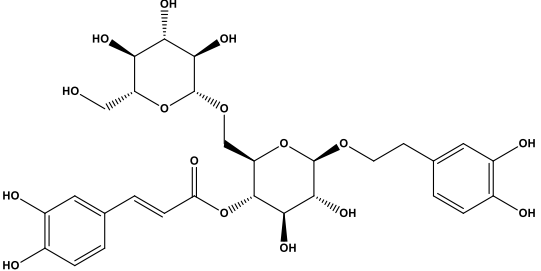   |                                                                                      |                      |                       |
| Code                                                                                 | Compound                                                                             | Reference            | Molecular Weight (Da) |
| PG_087                                                                               | Orobanchoside                                                                        | (compound 82) – (27) | 640.589               |
|   |                                                                                      |                      |                       |
| Code                                                                                 | Compound                                                                             | Reference            | Molecular Weight (Da) |
| PG_088                                                                               | $\beta$ -Phenethyl-O- $\beta$ -D-xylopyranosyl (1'-->6')- $\beta$ -D-glucopyranoside | (compound 83) – (27) | 416.421               |
|  |                                                                                      |                      |                       |
| Code                                                                                 | Compound                                                                             | Reference            | Molecular Weight (Da) |
| PG_089                                                                               | $\beta$ -Phenethyl-O- $\beta$ -D-xylopyranosyl (1'-->2')- $\beta$ -D-glucopyranoside | (compound 84) – (27) | 416.421               |

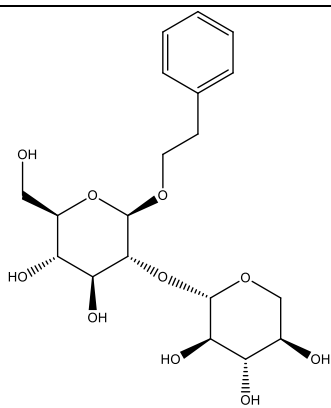

| Code   | Compound        | Reference            | Molecular Weight (Da) |
|--------|-----------------|----------------------|-----------------------|
| PG_090 | Plantainoside D | (compound 85) – (27) | 640.589               |

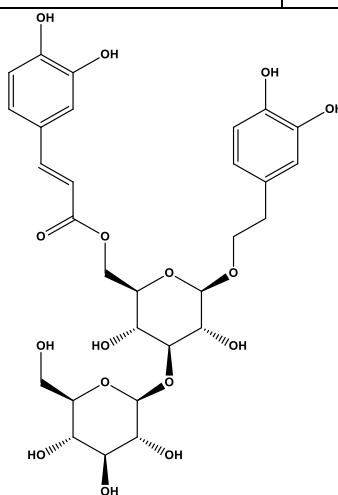

| Code   | Compound        | Reference            | Molecular Weight (Da) |
|--------|-----------------|----------------------|-----------------------|
| PG_091 | Plantainoside E | (compound 86) – (27) | 668.643               |

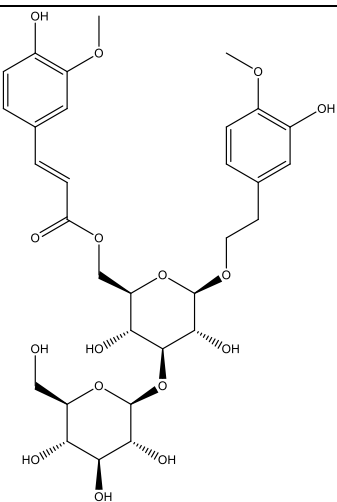

| Code   | Compound        | Reference            | Molecular Weight (Da) |
|--------|-----------------|----------------------|-----------------------|
| PG_092 | Plantainoside F | (compound 87) – (27) | 668.643               |

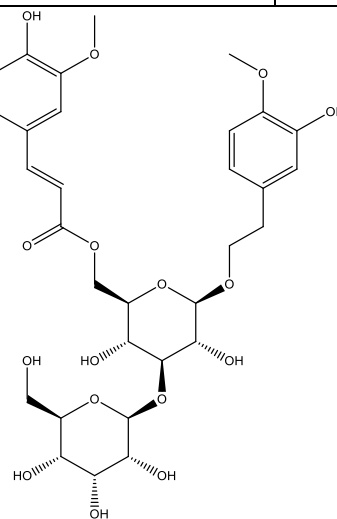

| Code   | Compound                           | Reference                                  | Molecular Weight (Da) |
|--------|------------------------------------|--------------------------------------------|-----------------------|
| PG_093 | Purpureaside A (or Plantamajoside) | (compound 88) – (27) (compound 138) – (31) | 640.589               |

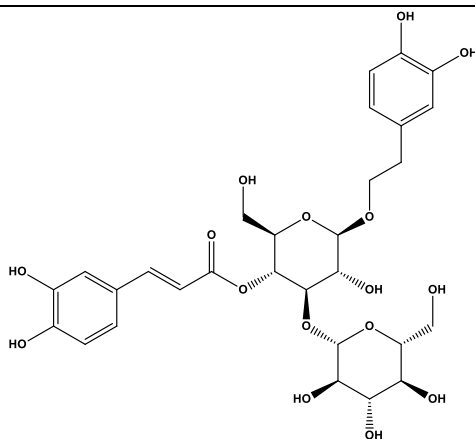

| Code   | Compound                         | Reference            | Molecular Weight (Da) |
|--------|----------------------------------|----------------------|-----------------------|
| PG_094 | Suspensaside (or Forsythoside C) | (compound 89) – (27) | 640.589               |

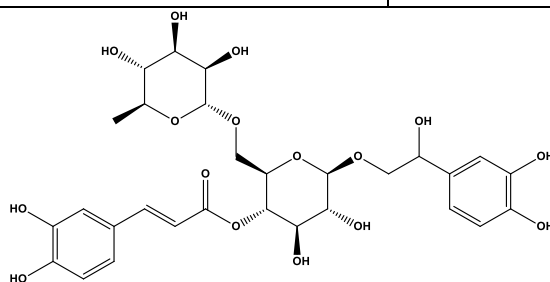

| Code   | Compound     | Reference                                     | Molecular Weight (Da) |
|--------|--------------|-----------------------------------------------|-----------------------|
| PG_095 | Alyssonoside | (compound 90) – (27)<br>(compound 129) – (31) | 798.785               |

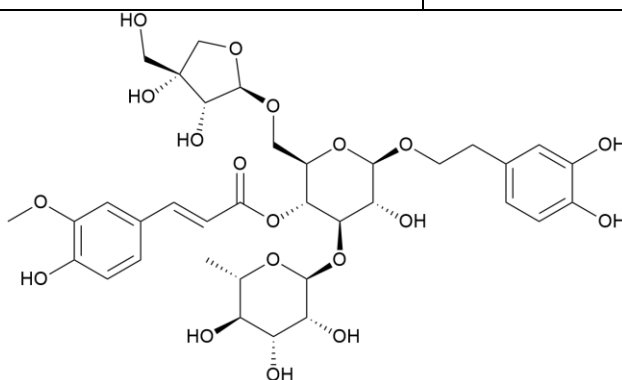

| Code   | Compound     | Reference       | Molecular Weight (Da) |
|--------|--------------|-----------------|-----------------------|
| PG_096 | Angoroside A | (compound 91) – | 756.704               |

|                                                                                                                                                                                                                                                                                                                                                                                                                                                                                                                                                |              | (27)                 |                       |
|------------------------------------------------------------------------------------------------------------------------------------------------------------------------------------------------------------------------------------------------------------------------------------------------------------------------------------------------------------------------------------------------------------------------------------------------------------------------------------------------------------------------------------------------|--------------|----------------------|-----------------------|
| 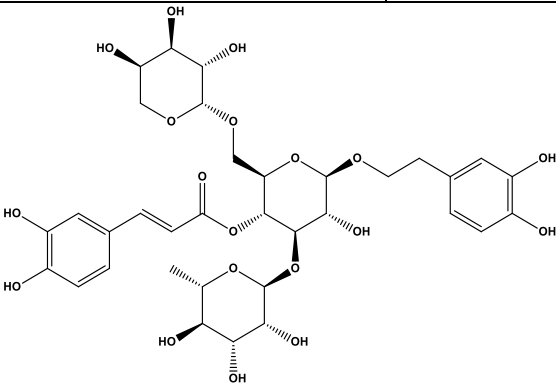 <p>The structure shows a central disaccharide core consisting of a glucose unit linked to a galactose unit. The glucose unit is substituted at C2 with a p-coumaroyl group and at C6 with a 3,4-dihydroxyphenylethyl group. The galactose unit is substituted at C2 with a 3,4-dihydroxyphenylethyl group. The galactose unit also has a hydroxyl group at C4 and a hydroxyl group at C6.</p>                                                               |              |                      |                       |
| Code                                                                                                                                                                                                                                                                                                                                                                                                                                                                                                                                           | Compound     | Reference            | Molecular Weight (Da) |
| PG_097                                                                                                                                                                                                                                                                                                                                                                                                                                                                                                                                         | Angoroside B | (compound 92) – (27) | 770.731               |
|  <p>The structure shows a central disaccharide core consisting of a glucose unit linked to a galactose unit. The glucose unit is substituted at C2 with a p-coumaroyl group and at C6 with a 3,4-dihydroxyphenylethyl group. The galactose unit is substituted at C2 with a 3,4-dihydroxyphenylethyl group. The galactose unit also has a hydroxyl group at C4 and a hydroxyl group at C6. Additionally, the galactose unit has a methoxy group at C4.</p>  |              |                      |                       |
| Code                                                                                                                                                                                                                                                                                                                                                                                                                                                                                                                                           | Compound     | Reference            | Molecular Weight (Da) |
| PG_098                                                                                                                                                                                                                                                                                                                                                                                                                                                                                                                                         | Angoroside C | (compound 93) – (27) | 786.774               |
|  <p>The structure shows a central disaccharide core consisting of a glucose unit linked to a galactose unit. The glucose unit is substituted at C2 with a p-coumaroyl group and at C6 with a 3,4-dihydroxyphenylethyl group. The galactose unit is substituted at C2 with a 3,4-dihydroxyphenylethyl group. The galactose unit also has a hydroxyl group at C4 and a hydroxyl group at C6. Additionally, the galactose unit has a methoxy group at C4.</p> |              |                      |                       |

| Code   | Compound                                    | Reference                                        | Molecular Weight (Da) |
|--------|---------------------------------------------|--------------------------------------------------|-----------------------|
| PG_099 | Arenarioside<br>(or Arenariside)            | (compound 94) –<br>(27) (compound<br>122) – (31) | 758.72                |
|        |                                             |                                                  |                       |
| Code   | Compound                                    | Reference                                        | Molecular Weight (Da) |
| PG_100 | Brandioside (or 2'-O-Acetyl<br>poliumoside) | (compound 95) –<br>(27) (compound<br>130) – (31) | 812.768               |
|        |                                             |                                                  |                       |
| Code   | Compound                                    | Reference                                        | Molecular Weight (Da) |
| PG_101 | Cistanoside A                               | (compound 96) –<br>(27)                          | 800.757               |



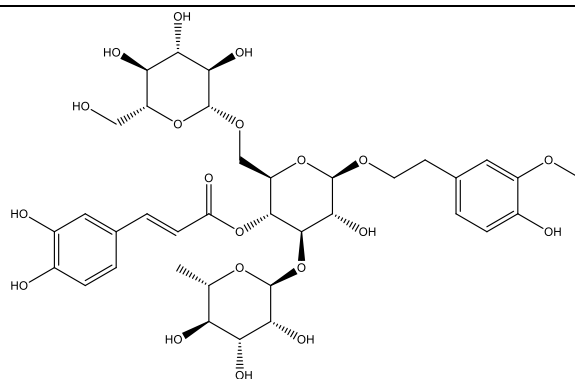

| Code   | Compound      | Reference            | Molecular Weight (Da) |
|--------|---------------|----------------------|-----------------------|
| PG_102 | Cistanoside B | (compound 97) – (27) | 814.784               |

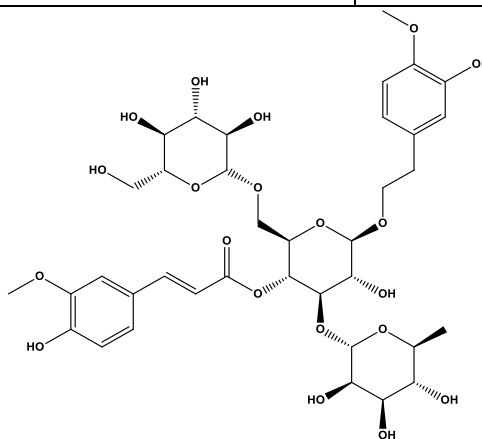

| Code   | Compound        | Reference            | Molecular Weight (Da) |
|--------|-----------------|----------------------|-----------------------|
| PG_103 | Crassifolioside | (compound 98) – (27) | 772.747               |

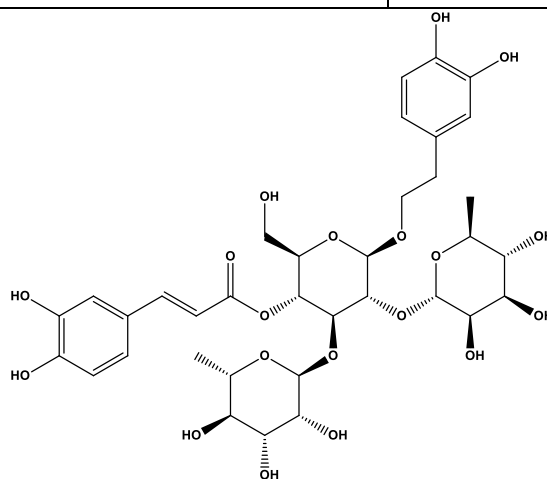

| Code | Compound | Reference | Molecular |
|------|----------|-----------|-----------|
|------|----------|-----------|-----------|

|                                                                                                                                                                                                                                                                                                                                                                                                                                         |                              |                                            | Weight (Da)           |
|-----------------------------------------------------------------------------------------------------------------------------------------------------------------------------------------------------------------------------------------------------------------------------------------------------------------------------------------------------------------------------------------------------------------------------------------|------------------------------|--------------------------------------------|-----------------------|
| PG_104                                                                                                                                                                                                                                                                                                                                                                                                                                  | Echinacoside                 | (compound 99) – (27) (compound 117) – (31) | 786.73                |
| 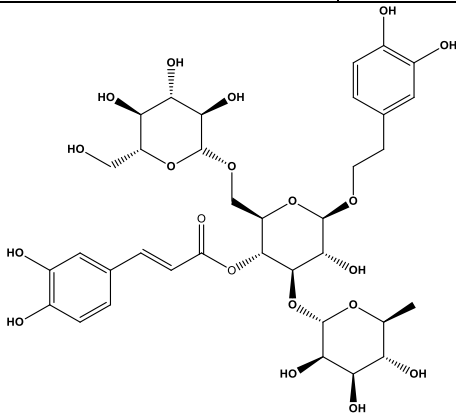 <p>The structure shows a central disaccharide core consisting of a glucose unit linked to a galactose unit. The glucose unit is substituted at C-2 with a p-coumaroyl group and at C-6 with a p-coumarylethyl group. The galactose unit is substituted at C-2 with a p-coumarylethyl group. Stereochemistry is indicated with wedges and dashes.</p> |                              |                                            |                       |
| Code                                                                                                                                                                                                                                                                                                                                                                                                                                    | Compound                     | Reference                                  | Molecular Weight (Da) |
| PG_105                                                                                                                                                                                                                                                                                                                                                                                                                                  | 6'''-O-caffeoyl echinacoside | (compound 100) – (27)                      | 948.874               |
|  <p>The structure shows a central disaccharide core (glucose-galactose) with a p-coumarylethyl group at C-6 of the glucose unit. The galactose unit is substituted at C-2 with a caffeoyl group and at C-6 with a p-coumarylethyl group. Stereochemistry is indicated with wedges and dashes.</p>                                                   |                              |                                            |                       |
| Code                                                                                                                                                                                                                                                                                                                                                                                                                                    | Compound                     | Reference                                  | Molecular Weight (Da) |
| PG_106                                                                                                                                                                                                                                                                                                                                                                                                                                  | Ehrensoside                  | (compound 101) – (27)                      | 756.704               |
|  <p>The structure shows a central disaccharide core (glucose-galactose) with a p-coumarylethyl group at C-6 of the glucose unit. The galactose unit is substituted at C-2 with a p-coumaroyl group and at C-6 with a p-coumarylethyl group. Stereochemistry is indicated with wedges and dashes.</p>                                                |                              |                                            |                       |
| Code                                                                                                                                                                                                                                                                                                                                                                                                                                    | Compound                     | Reference                                  | Molecular             |

|        |                |                                             |                       |
|--------|----------------|---------------------------------------------|-----------------------|
|        |                |                                             | Weight (Da)           |
| PG_107 | Forsythoside B | (compound 102) – (27) (compound 125) – (31) | 756.704               |
|        |                |                                             |                       |
| Code   | Compound       | Reference                                   | Molecular Weight (Da) |
| PG_108 | Jionoside A1   | (compound 103) – (27)                       | 800.757               |
|        |                |                                             |                       |
| Code   | Compound       | Reference                                   | Molecular Weight (Da) |
| PG_109 | Jionoside A2   | (compound 104) – (27)                       | 800.757               |
|        |                |                                             |                       |
| Code   | Compound       | Reference                                   | Molecular             |

|                                                                                                                                                                                                                                                                                                                                                                                                                                                                                                                                                                                                                                                                                                                                 |              |                          | Weight (Da)           |
|---------------------------------------------------------------------------------------------------------------------------------------------------------------------------------------------------------------------------------------------------------------------------------------------------------------------------------------------------------------------------------------------------------------------------------------------------------------------------------------------------------------------------------------------------------------------------------------------------------------------------------------------------------------------------------------------------------------------------------|--------------|--------------------------|-----------------------|
| PG_110                                                                                                                                                                                                                                                                                                                                                                                                                                                                                                                                                                                                                                                                                                                          | Jionoside B1 | (compound 105) –<br>(27) | 814.784               |
| 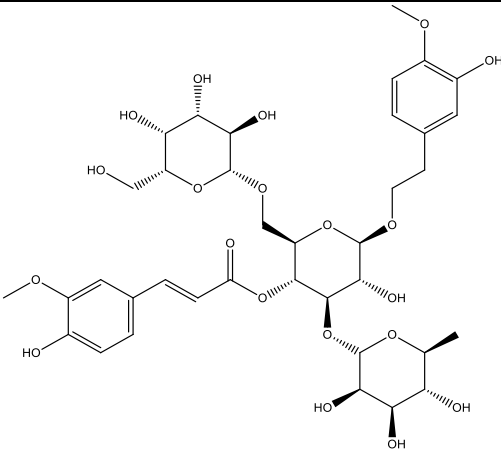 <p>The structure of Jionoside B1 is a complex glycoside. It features a central disaccharide core consisting of a glucose unit linked to a galactose unit. The glucose unit is substituted with a p-coumaroyl group at the C6 position and a 4-O-methylphenylbutyl group at the C2 position. The galactose unit is substituted with a 4-O-methylphenylbutyl group at the C2 position. The galactose unit is also linked to a glucose unit at the C4 position, which is substituted with a 4-O-methylphenylbutyl group at the C2 position. The galactose unit is also substituted with a 4-O-methylphenylbutyl group at the C2 position.</p>   |              |                          |                       |
| Code                                                                                                                                                                                                                                                                                                                                                                                                                                                                                                                                                                                                                                                                                                                            | Compound     | Reference                | Molecular Weight (Da) |
| PG_111                                                                                                                                                                                                                                                                                                                                                                                                                                                                                                                                                                                                                                                                                                                          | Jionoside B2 | (compound 106) –<br>(27) | 814.784               |
|  <p>The structure of Jionoside B2 is a complex glycoside. It features a central disaccharide core consisting of a glucose unit linked to a galactose unit. The glucose unit is substituted with a p-coumaroyl group at the C6 position and a 4-O-methylphenylbutyl group at the C2 position. The galactose unit is substituted with a 4-O-methylphenylbutyl group at the C2 position. The galactose unit is also linked to a glucose unit at the C4 position, which is substituted with a 4-O-methylphenylbutyl group at the C2 position. The galactose unit is also substituted with a 4-O-methylphenylbutyl group at the C2 position.</p> |              |                          |                       |
| Code                                                                                                                                                                                                                                                                                                                                                                                                                                                                                                                                                                                                                                                                                                                            | Compound     | Reference                | Molecular Weight (Da) |
| PG_112                                                                                                                                                                                                                                                                                                                                                                                                                                                                                                                                                                                                                                                                                                                          | Jionoside E  | (compound 107) –<br>(27) | 770.731               |

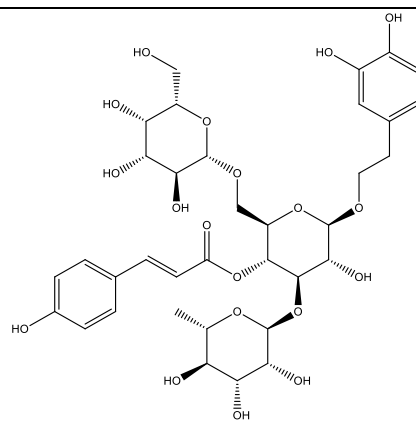

| Code   | Compound   | Reference             | Molecular Weight (Da) |
|--------|------------|-----------------------|-----------------------|
| PG_113 | Lagotoside | (compound 108) – (27) | 784.758               |

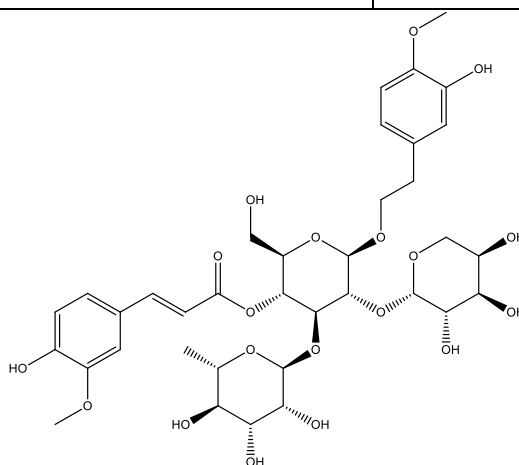

| Code   | Compound                                                                        | Reference             | Molecular Weight (Da) |
|--------|---------------------------------------------------------------------------------|-----------------------|-----------------------|
| PG_114 | Lavandulifolioside Arb (1''->2'')<br>Rha<br>(or Stachyoside A or Stachyoside B) | (compound 109) – (27) | 624.59                |

| 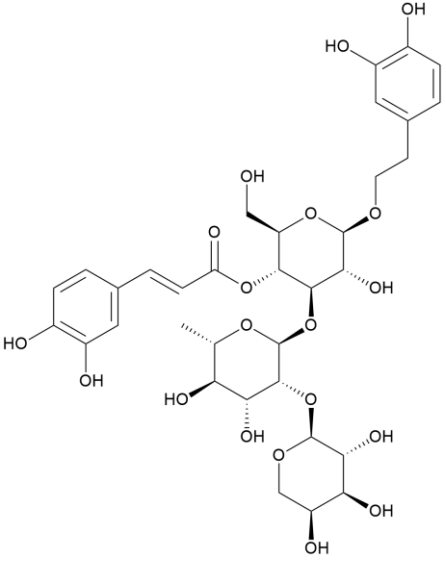 <p>The structure shows a central glucose unit linked to a rhamnose unit at C1. The glucose unit has a p-coumaroyl group at C2 and a 3-O-β-D-glucopyranosyl group at C3. The rhamnose unit has a 3-O-β-D-glucopyranosyl group at C1 and a 4-O-β-D-glucopyranosyl group at C2. The glucose unit at C4 has a 3-O-β-D-glucopyranosyl group at C1 and a 4-O-β-D-glucopyranosyl group at C2. The glucose unit at C5 has a 3-O-β-D-glucopyranosyl group at C1 and a 4-O-β-D-glucopyranosyl group at C2.</p>   |                                        |                                             |                       |
|-------------------------------------------------------------------------------------------------------------------------------------------------------------------------------------------------------------------------------------------------------------------------------------------------------------------------------------------------------------------------------------------------------------------------------------------------------------------------------------------------------------------------------------------------------------------------------------------|----------------------------------------|---------------------------------------------|-----------------------|
| Code                                                                                                                                                                                                                                                                                                                                                                                                                                                                                                                                                                                      | Compound                               | Reference                                   | Molecular Weight (Da) |
| PG_115                                                                                                                                                                                                                                                                                                                                                                                                                                                                                                                                                                                    | Leucosceptoside B                      | (compound 110) – (27) (compound 126) – (31) | 784.758               |
|  <p>The structure shows a central glucose unit linked to a rhamnose unit at C1. The glucose unit has a p-coumaroyl group at C2 and a 3-O-β-D-glucopyranosyl group at C3. The rhamnose unit has a 3-O-β-D-glucopyranosyl group at C1 and a 4-O-β-D-glucopyranosyl group at C2. The glucose unit at C4 has a 3-O-β-D-glucopyranosyl group at C1 and a 4-O-β-D-glucopyranosyl group at C2. The glucose unit at C5 has a 3-O-β-D-glucopyranosyl group at C1 and a 4-O-β-D-glucopyranosyl group at C2.</p> |                                        |                                             |                       |
| Code                                                                                                                                                                                                                                                                                                                                                                                                                                                                                                                                                                                      | Compound                               | Reference                                   | Molecular Weight (Da) |
| PG_116                                                                                                                                                                                                                                                                                                                                                                                                                                                                                                                                                                                    | Ligupurpurososide A Rha(1'''->4'') Rha | (compound 111) – (27)                       | 770.731               |

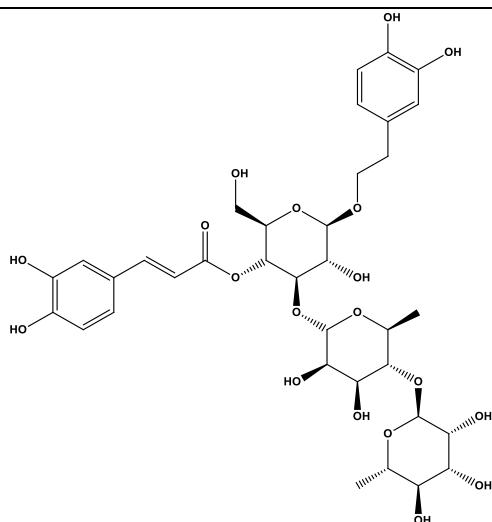

| Code   | Compound                                | Reference                | Molecular Weight (Da) |
|--------|-----------------------------------------|--------------------------|-----------------------|
| PG_117 | Ligupurpuroside B Rha(1'''->4'')<br>Rha | (compound 112) –<br>(27) | 740.749               |

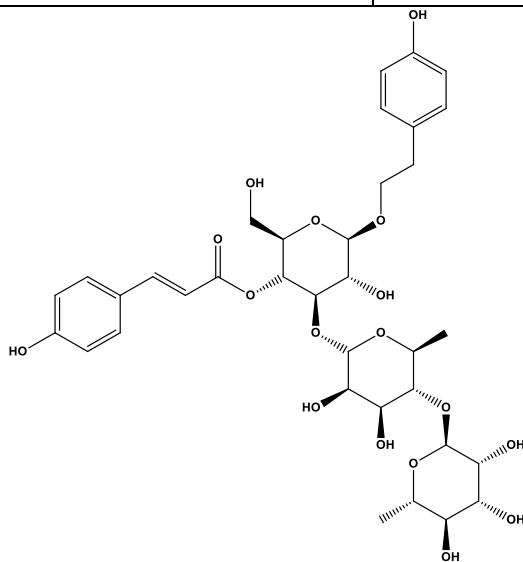

| Code   | Compound                       | Reference                | Molecular Weight (Da) |
|--------|--------------------------------|--------------------------|-----------------------|
| PG_118 | Myricoside Api (1'''->3'') Rha | (compound 113) –<br>(27) | 756.704               |

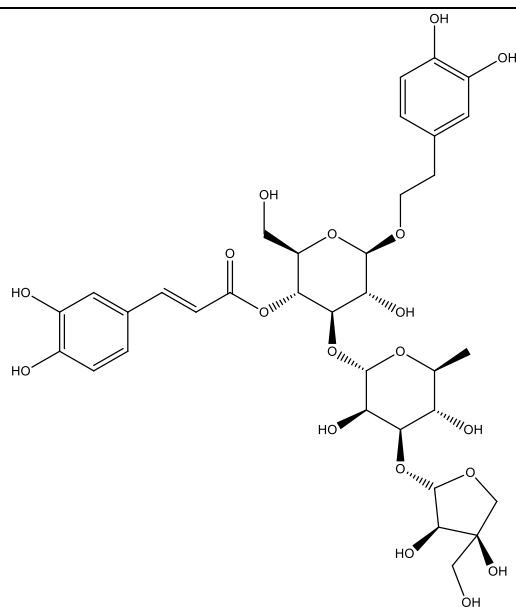

| Code   | Compound     | Reference             | Molecular Weight (Da) |
|--------|--------------|-----------------------|-----------------------|
| PG_119 | Neoacteoside | (compound 114) – (27) | 786.73                |

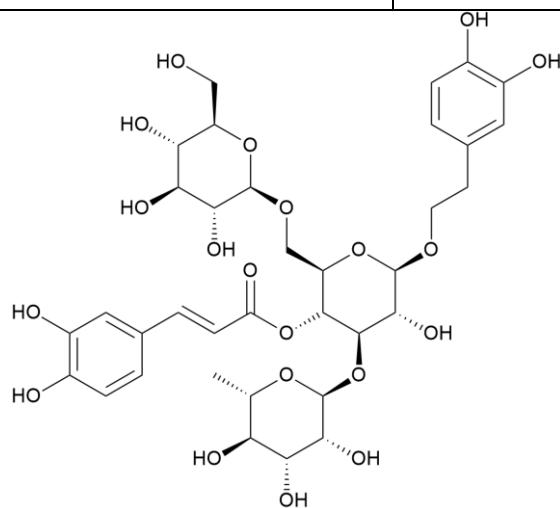

| Code   | Compound       | Reference             | Molecular Weight (Da) |
|--------|----------------|-----------------------|-----------------------|
| PG_120 | Purpureaside C | (compound 115) – (27) | 788.746               |



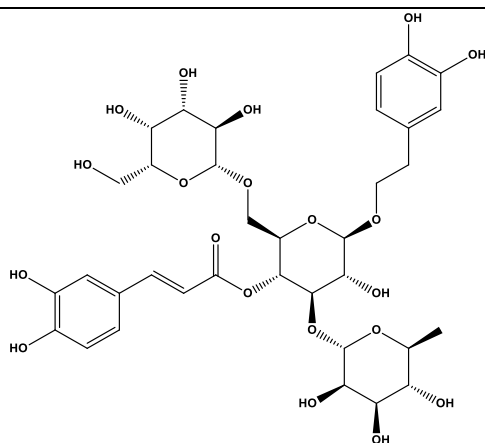

| Code   | Compound        | Reference             | Molecular Weight (Da) |
|--------|-----------------|-----------------------|-----------------------|
| PG_121 | NO TRIVIAL NAME | (compound 116) – (27) | 772.747               |

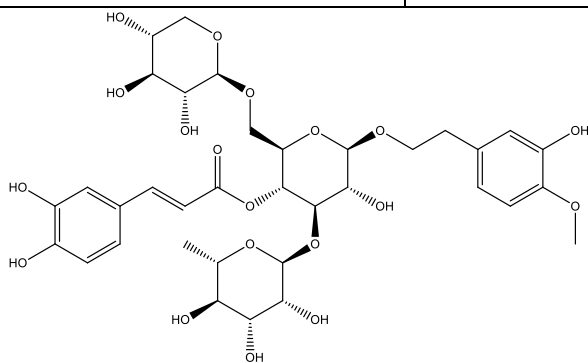

| Code   | Compound        | Reference             | Molecular Weight (Da) |
|--------|-----------------|-----------------------|-----------------------|
| PG_122 | NO TRIVIAL NAME | (compound 117) – (27) | 784.758               |

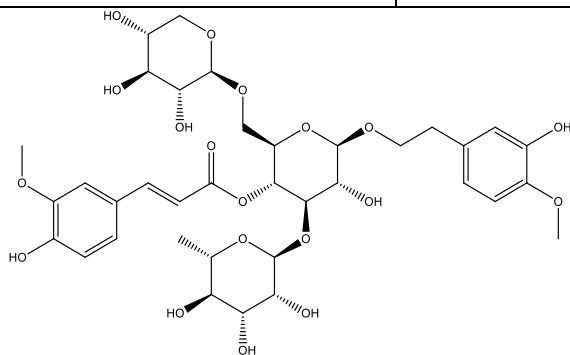

| Code   | Compound        | Reference             | Molecular Weight (Da) |
|--------|-----------------|-----------------------|-----------------------|
| PG_123 | NO TRIVIAL NAME | (compound 118) – (27) | 770.731               |

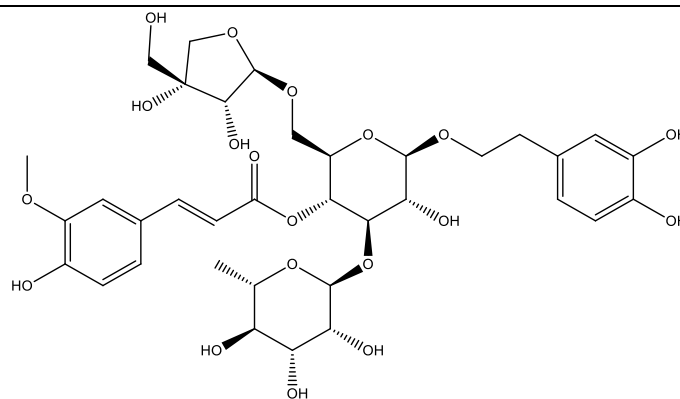

| Code   | Compound        | Reference             | Molecular Weight (Da) |
|--------|-----------------|-----------------------|-----------------------|
| PG_124 | NO TRIVIAL NAME | (compound 119) – (27) | 814.784               |

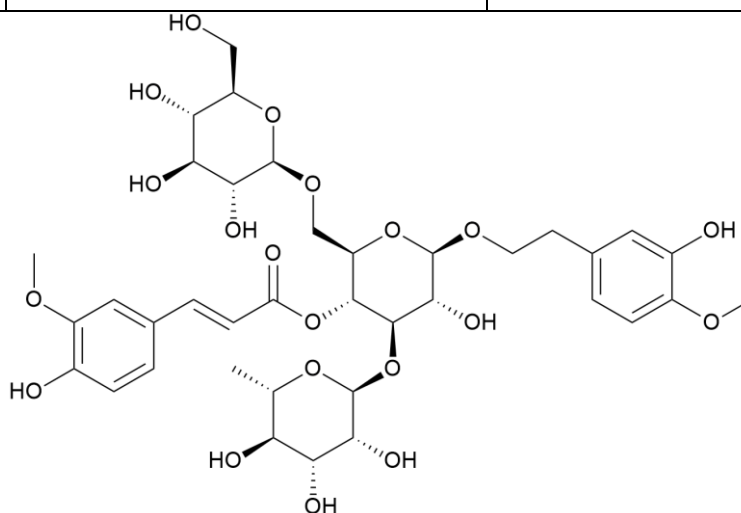

| Code   | Compound        | Reference             | Molecular Weight (Da) |
|--------|-----------------|-----------------------|-----------------------|
| PG_125 | NO TRIVIAL NAME | (compound 120) – (27) | 786.73                |

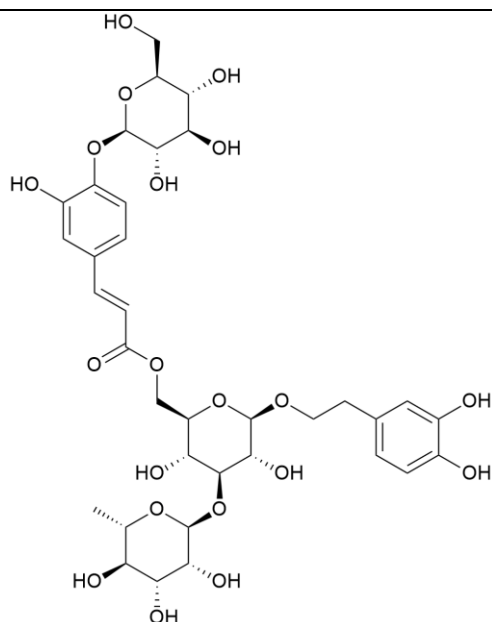

| Code   | Compound          | Reference             | Molecular Weight (Da) |
|--------|-------------------|-----------------------|-----------------------|
| PG_126 | Pedicularioside I | (compound 121) – (27) | 784.758               |

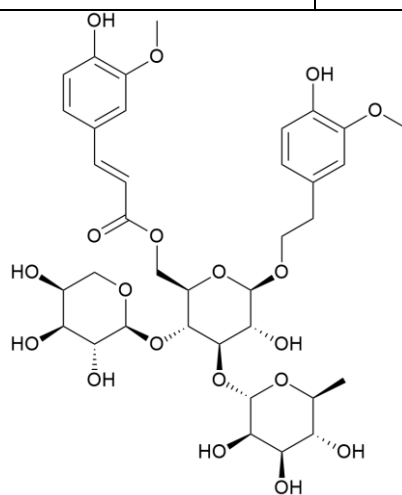

| Code   | Compound    | Reference             | Molecular Weight (Da) |
|--------|-------------|-----------------------|-----------------------|
| PG_127 | Pheliposide | (compound 122) – (27) | 800.757               |

| Code   | Compound                                        | Reference             | Molecular Weight (Da) |
|--------|-------------------------------------------------|-----------------------|-----------------------|
| PG_128 | Phlinoside A Glc (1" <sup>'''</sup> -->2'') Rha | (compound 123) – (27) | 786.73                |
|        |                                                 |                       |                       |
| Code   | Compound                                        | Reference             | Molecular Weight (Da) |
| PG_129 | Phlinoside B xyl (1" <sup>'''</sup> -->2'') Rha | (compound 124) – (27) | 756.704               |

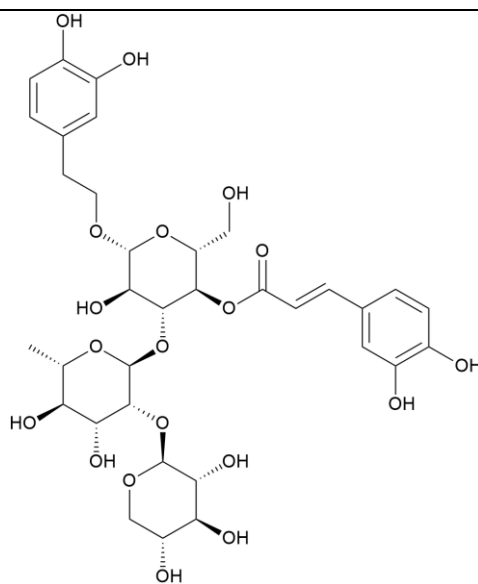

| Code   | Compound                         | Reference             | Molecular Weight (Da) |
|--------|----------------------------------|-----------------------|-----------------------|
| PG_130 | Phlinside C Rha(1'''--> 2'') Rha | (compound 122) – (27) | 770.731               |

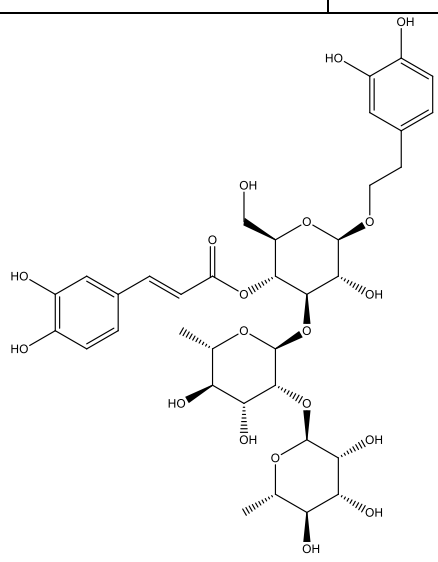

| Code   | Compound                         | Reference             | Molecular Weight (Da) |
|--------|----------------------------------|-----------------------|-----------------------|
| PG_131 | Phlinside D Xyl(1'''--> 2'') Rha | (compound 126) – (27) | 770.731               |

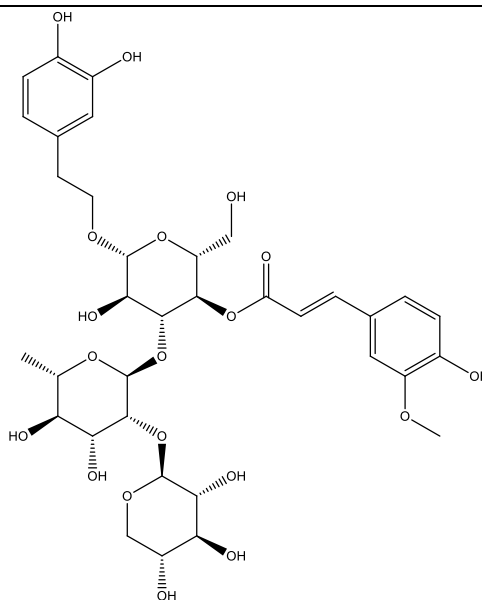

| Code   | Compound                         | Reference             | Molecular Weight (Da) |
|--------|----------------------------------|-----------------------|-----------------------|
| PG_132 | Phlinoside E Rha(1'''-->2'') Rha | (compound 127) – (27) | 784.758               |

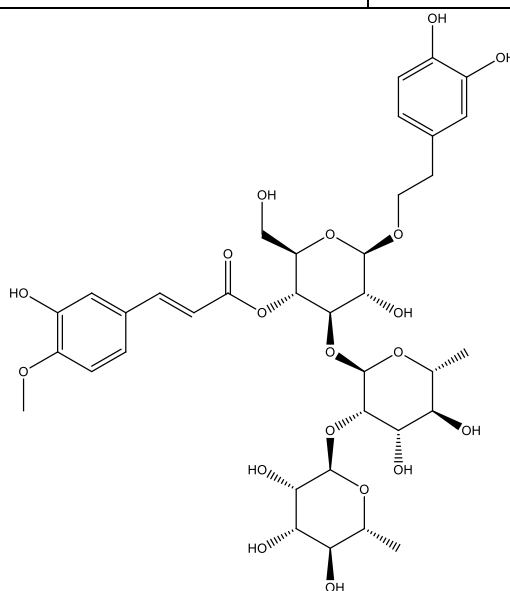

| Code   | Compound                           | Reference             | Molecular Weight (Da) |
|--------|------------------------------------|-----------------------|-----------------------|
| PG_133 | Rossicaside A Glc (1'''-->4'') Rha | (compound 129) – (27) | 772.747               |



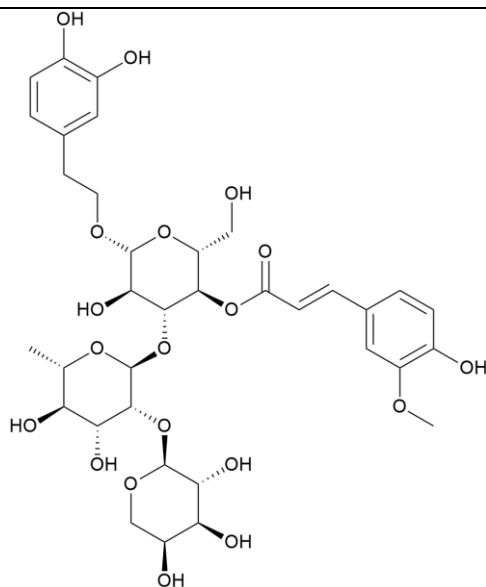

| Code   | Compound                                              | Reference                | Molecular Weight (Da) |
|--------|-------------------------------------------------------|--------------------------|-----------------------|
| PG_136 | Stachyoside D Arb (1''-->2'') Rha<br>(or leonoside B) | (compound 132) –<br>(27) | 784.758               |

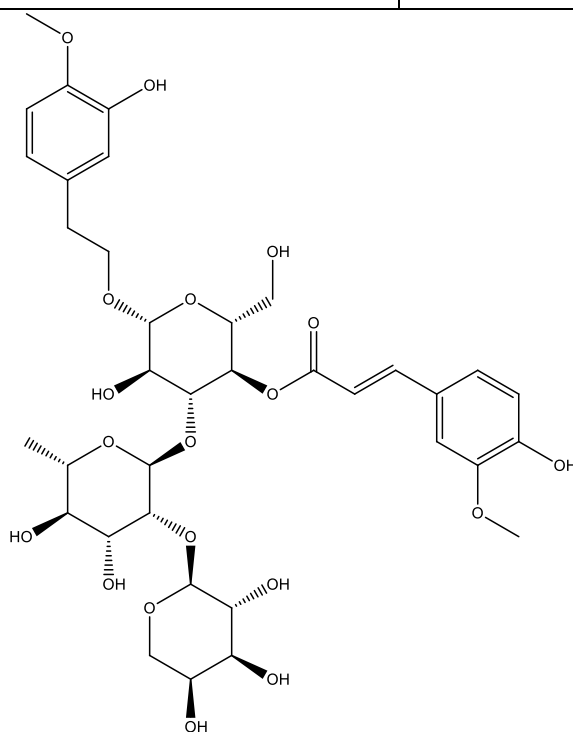

| Code   | Compound                        | Reference                                         | Molecular Weight (Da) |
|--------|---------------------------------|---------------------------------------------------|-----------------------|
| PG_137 | Teucrioside Lyx (1''-->2'') Rha | (compound 133) –<br>(27) (compound<br>135) – (31) | 756.704               |



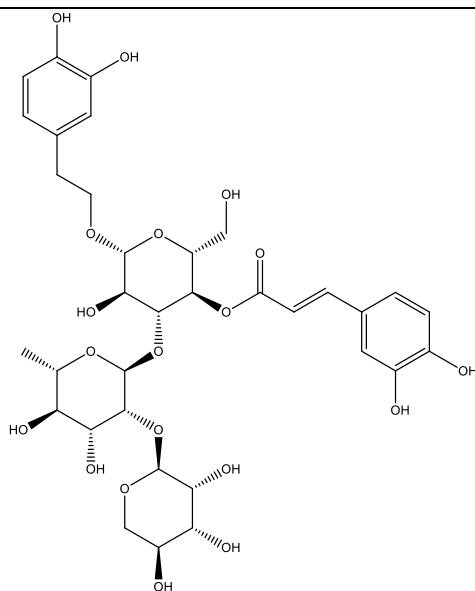

| Code   | Compound                                                             | Reference                                                                        | Molecular Weight (Da) |
|--------|----------------------------------------------------------------------|----------------------------------------------------------------------------------|-----------------------|
| PG_138 | Teupolioside Glt (1'''->2'') Rha<br>(or Lamiosides A or Lamioside A) | (compound 134) –<br>(27) (compound 10)<br>– (28)<br><br>(compound 136) –<br>(31) | 786.73                |

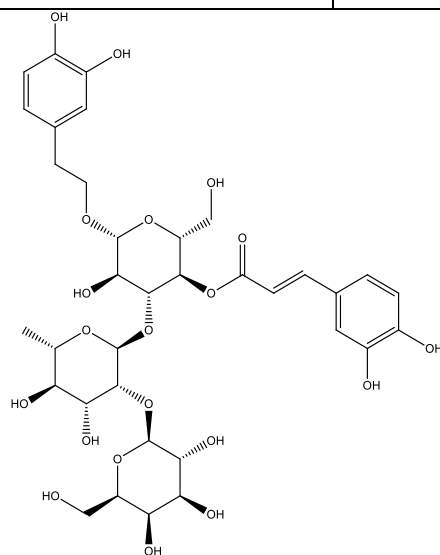

| Code   | Compound     | Reference                | Molecular Weight (Da) |
|--------|--------------|--------------------------|-----------------------|
| PG_139 | Tubuloside A | (compound 135) –<br>(27) | 828.767               |

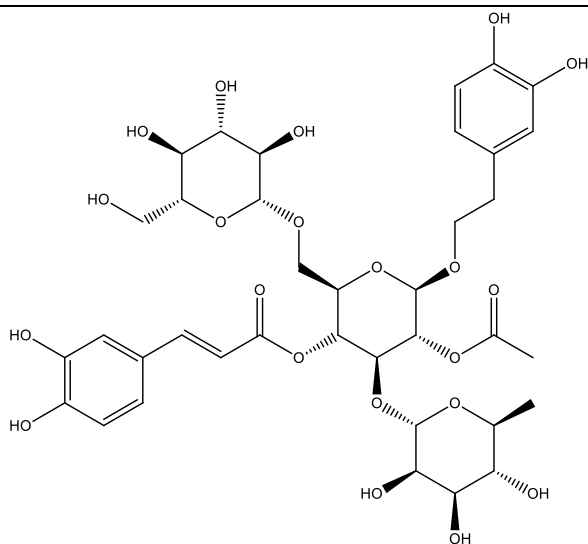

| Code   | Compound                                       | Reference             | Molecular Weight (Da) |
|--------|------------------------------------------------|-----------------------|-----------------------|
| PG_140 | Tubuloside C 2'',3'',4''-tri-O-acetylramnoside | (compound 136) – (27) | 956.894               |

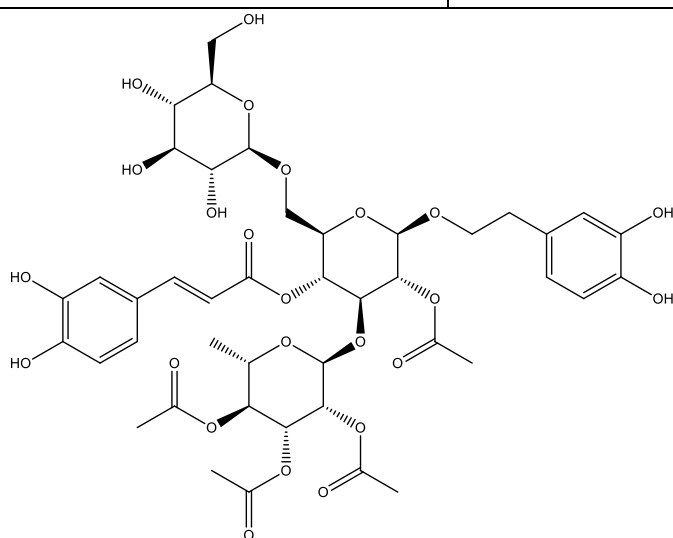

| Code   | Compound                                       | Reference             | Molecular Weight (Da) |
|--------|------------------------------------------------|-----------------------|-----------------------|
| PG_141 | Tubuloside D 2'',3'',4''-tri-O-acetylramnoside | (compound 137) – (27) | 940.895               |

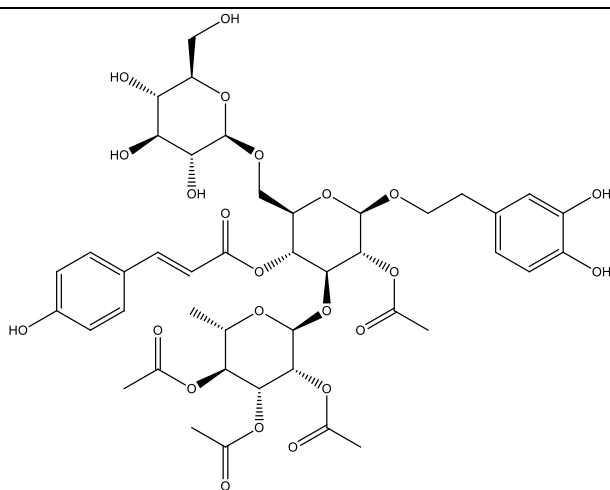

| Code   | Compound     | Reference             | Molecular Weight (Da) |
|--------|--------------|-----------------------|-----------------------|
| PG_142 | Mussatioside | (compound 138) – (27) | 578.562               |

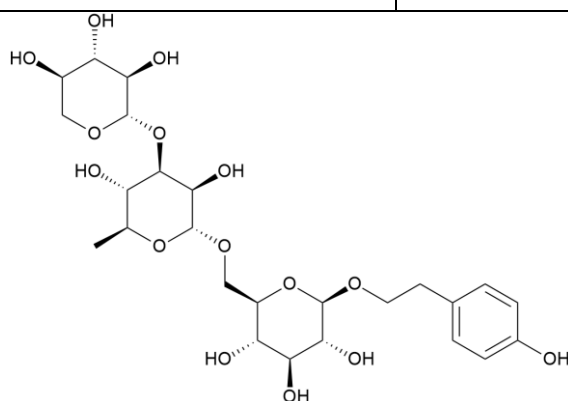

| Code   | Compound                                     | Reference             | Molecular Weight (Da) |
|--------|----------------------------------------------|-----------------------|-----------------------|
| PG_143 | 4-cinnamoyl mussatioside (or mussatioside I) | (compound 139) – (27) | 708.707               |

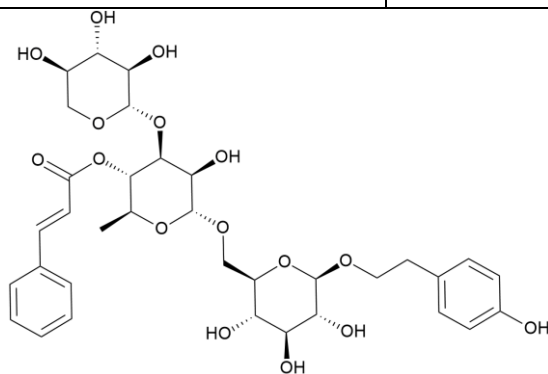

| Code | Compound | Reference | Molecular Weight (Da) |
|------|----------|-----------|-----------------------|
|      |          |           |                       |

|        |                                                         |                          |                       |
|--------|---------------------------------------------------------|--------------------------|-----------------------|
| PG_144 | 4-cis-p-coumaroyl mussatioside                          | (compound 140) –<br>(27) | 724.706               |
|        |                                                         |                          |                       |
| Code   | Compound                                                | Reference                | Molecular Weight (Da) |
| PG_145 | 4-dimethylcaffeoyl mussatioside<br>(or mussatioside II) | (compound 141) –<br>(27) | 768.759               |
|        |                                                         |                          |                       |
| Code   | Compound                                                | Reference                | Molecular Weight (Da) |
| PG_146 | 4-feruloyl mussatioside                                 | (compound 142) –<br>(27) | 754.732               |
|        |                                                         |                          |                       |
| Code   | Compound                                                | Reference                | Molecular Weight (Da) |
| PG_147 | 4-p-coumaroyl mussatioside                              | (compound 143) –<br>(27) | 724.706               |

| 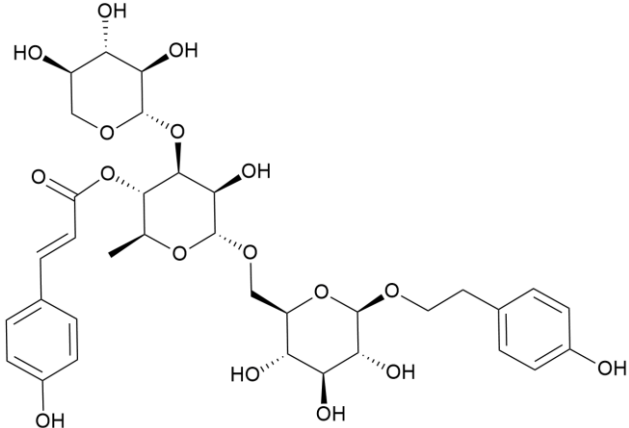   |                                                            |                          |                       |
|--------------------------------------------------------------------------------------|------------------------------------------------------------|--------------------------|-----------------------|
| Code                                                                                 | Compound                                                   | Reference                | Molecular Weight (Da) |
| PG_148                                                                               | 4-p-methoxycinnamoyl mussatioside<br>(or mussatioside III) | (compound 144) –<br>(27) | 740.749               |
|   |                                                            |                          |                       |
| Code                                                                                 | Compound                                                   | Reference                | Molecular Weight (Da) |
| PG_149                                                                               | 4-vanilloyl mussatioside                                   | (compound 145) –<br>(27) | 728.694               |
|  |                                                            |                          |                       |
| Code                                                                                 | Compound                                                   | Reference                | Molecular             |

|                                                                                                                                                                                                                                                                                                                                                                                                                                                                                                                                                                                                                                                                                               |                   |                                             | Weight (Da)           |
|-----------------------------------------------------------------------------------------------------------------------------------------------------------------------------------------------------------------------------------------------------------------------------------------------------------------------------------------------------------------------------------------------------------------------------------------------------------------------------------------------------------------------------------------------------------------------------------------------------------------------------------------------------------------------------------------------|-------------------|---------------------------------------------|-----------------------|
| PG_150                                                                                                                                                                                                                                                                                                                                                                                                                                                                                                                                                                                                                                                                                        | Pedicularioside A | (compound 146) – (27) (compound 118) – (31) | 756.704               |
| 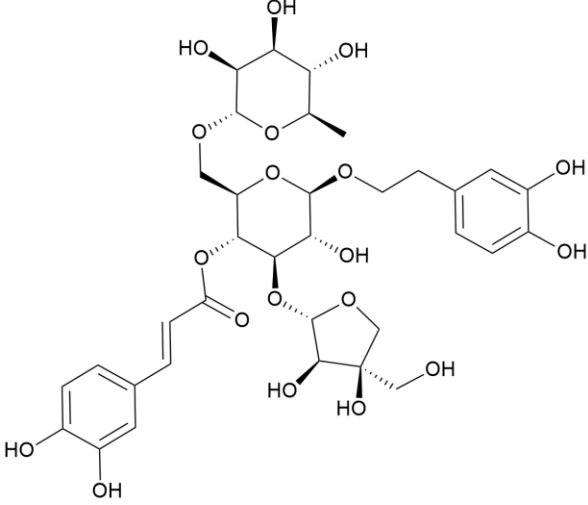 <p>The structure of Pedicularioside A is a complex glycoside. It features a central glucose unit linked to a galactose unit at the C1 position. The galactose unit is further linked to a glucose unit at the C1 position. This glucose unit is substituted at the C2 position with a p-coumaroyl group (a trans-3,4-dihydroxycinnamoyl group). At the C4 position of this glucose unit, there is a linkage to a rhamnose unit. The rhamnose unit is substituted at the C2 position with a 3,4-dihydroxyphenyl group (a catechol group).</p>                                                               |                   |                                             |                       |
| Code                                                                                                                                                                                                                                                                                                                                                                                                                                                                                                                                                                                                                                                                                          | Compound          | Reference                                   | Molecular Weight (Da) |
| PG_151                                                                                                                                                                                                                                                                                                                                                                                                                                                                                                                                                                                                                                                                                        | Pedicularioside H | (compound 147) – (27)                       | 784.758               |
|  <p>The structure of Pedicularioside H is a complex glycoside. It features a central glucose unit linked to a galactose unit at the C1 position. The galactose unit is further linked to a glucose unit at the C1 position. This glucose unit is substituted at the C2 position with a p-coumaroyl group (a trans-3,4-dihydroxycinnamoyl group). At the C4 position of this glucose unit, there is a linkage to a rhamnose unit. The rhamnose unit is substituted at the C2 position with a 3,4-dihydroxy-5-methoxyphenyl group (a 3,4-dihydroxyphenyl group with a methoxy group at the 5-position).</p> |                   |                                             |                       |
| Code                                                                                                                                                                                                                                                                                                                                                                                                                                                                                                                                                                                                                                                                                          | Compound          | Reference                                   | Molecular Weight (Da) |
| PG_152                                                                                                                                                                                                                                                                                                                                                                                                                                                                                                                                                                                                                                                                                        | Purpureaside B    | (compound 148) – (27)                       | 786.73                |



|                                                                                                                                                                                                                                                                                                                                                                                                                                                                                                                                                                                                                                                                                                                                                            |               |                       | Weight (Da)           |
|------------------------------------------------------------------------------------------------------------------------------------------------------------------------------------------------------------------------------------------------------------------------------------------------------------------------------------------------------------------------------------------------------------------------------------------------------------------------------------------------------------------------------------------------------------------------------------------------------------------------------------------------------------------------------------------------------------------------------------------------------------|---------------|-----------------------|-----------------------|
| PG_155                                                                                                                                                                                                                                                                                                                                                                                                                                                                                                                                                                                                                                                                                                                                                     | Magnoloside B | (compound 151) – (27) | 786.73                |
| 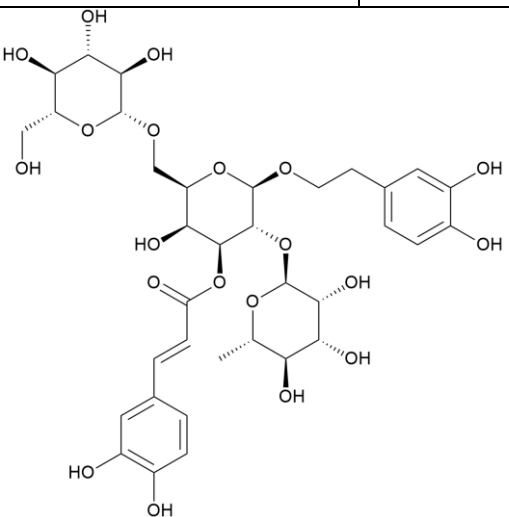 <p>The structure of Magnoloside B consists of a central aglycone core. This core features a 3,4,5-trihydroxyphenyl group attached to a propyl chain, which is further linked to a glucose unit at the C-6 position. The C-1 position of this glucose is linked to another glucose unit at its C-1 position. The C-2 position of this second glucose is linked to a third glucose unit at its C-1 position. The C-2 position of this third glucose is linked to a 3,4,5-trihydroxyphenyl group via an ester linkage.</p>                                                                                                                                                 |               |                       |                       |
| Code                                                                                                                                                                                                                                                                                                                                                                                                                                                                                                                                                                                                                                                                                                                                                       | Compound      | Reference             | Molecular Weight (Da) |
| PG_156                                                                                                                                                                                                                                                                                                                                                                                                                                                                                                                                                                                                                                                                                                                                                     | Magnoloside C | (compound 152) – (27) | 948.871               |
|  <p>The structure of Magnoloside C is similar to Magnoloside B but includes an additional glucose unit. It features a central aglycone core with a 3,4,5-trihydroxyphenyl group attached to a propyl chain, which is linked to a glucose unit at the C-6 position. The C-1 position of this glucose is linked to another glucose unit at its C-1 position. The C-2 position of this second glucose is linked to a third glucose unit at its C-1 position. The C-2 position of this third glucose is linked to a fourth glucose unit at its C-1 position. The C-2 position of this fourth glucose is linked to a 3,4,5-trihydroxyphenyl group via an ester linkage.</p> |               |                       |                       |
| Code                                                                                                                                                                                                                                                                                                                                                                                                                                                                                                                                                                                                                                                                                                                                                       | Compound      | Reference             | Molecular Weight (Da) |
| PG_157                                                                                                                                                                                                                                                                                                                                                                                                                                                                                                                                                                                                                                                                                                                                                     | Oleoacteoside | (compound 153) – (27) | 1014.97               |



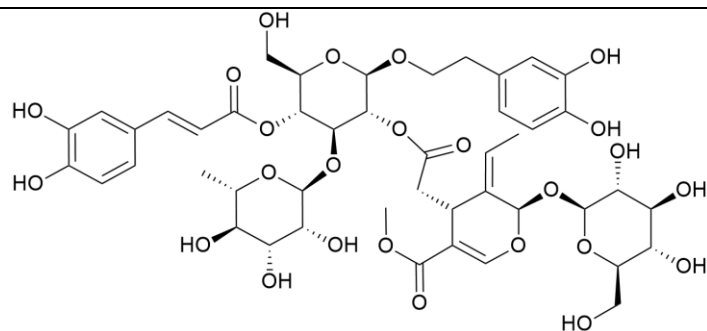

| Code   | Compound        | Reference             | Molecular Weight (Da) |
|--------|-----------------|-----------------------|-----------------------|
| PG_158 | Oleoehinacoside | (compound 154) – (27) | 1175.1                |

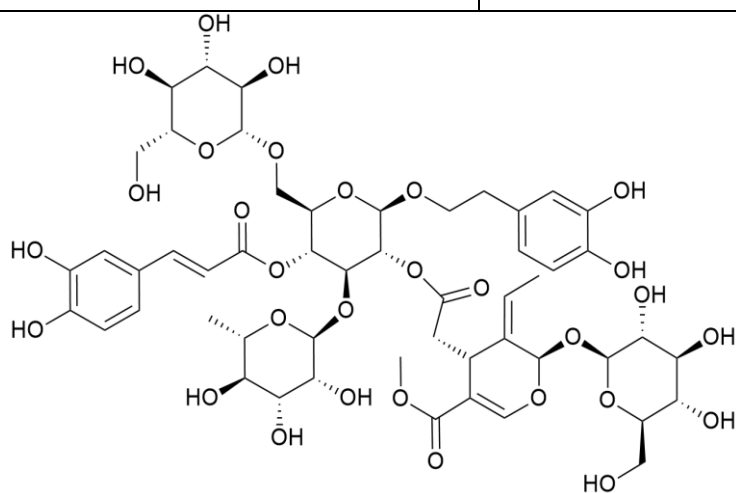

| Code   | Compound  | Reference             | Molecular Weight (Da) |
|--------|-----------|-----------------------|-----------------------|
| PG_159 | Nuzhenide | (compound 155) – (27) | 686.657               |

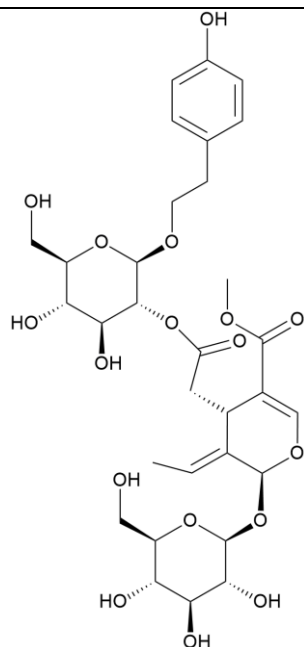

| Code   | Compound              | Reference           | Molecular Weight (Da) |
|--------|-----------------------|---------------------|-----------------------|
| PG_160 | Acetyl forsythoside B | (compound 1) – (28) | 800.757               |

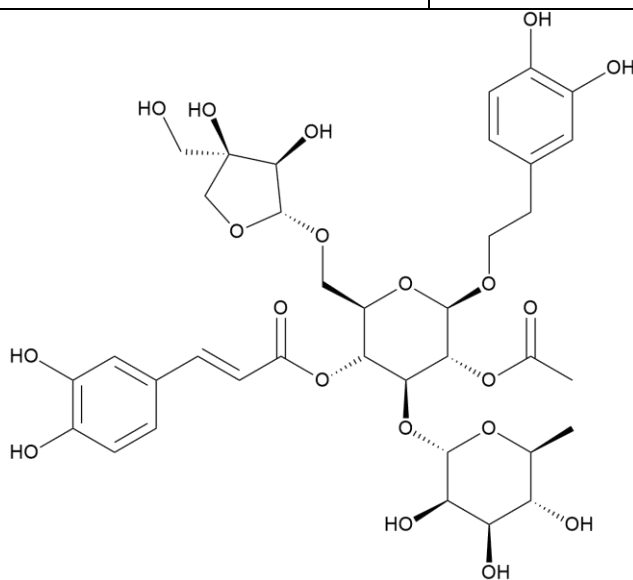

| Code   | Compound     | Reference           | Molecular Weight (Da) |
|--------|--------------|---------------------|-----------------------|
| PG_161 | Salsasides D | (compound 2) – (28) | 650.628               |

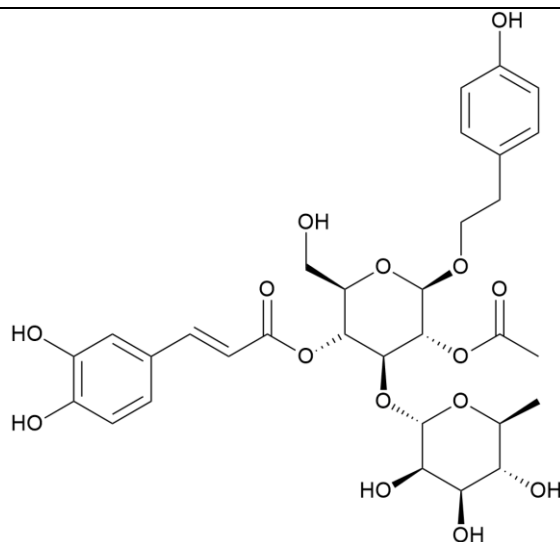

| Code   | Compound     | Reference           | Molecular Weight (Da) |
|--------|--------------|---------------------|-----------------------|
| PG_162 | Salsasides E | (compound 3) – (28) | 680.654               |

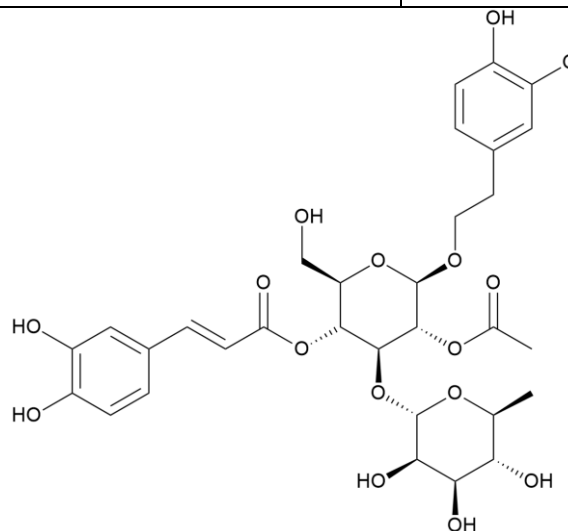

| Code   | Compound     | Reference           | Molecular Weight (Da) |
|--------|--------------|---------------------|-----------------------|
| PG_163 | Salsasides F | (compound 4) – (28) | 650.628               |

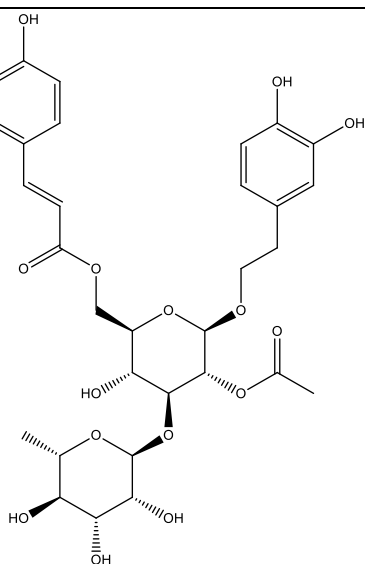

| Code   | Compound                       | Reference                                   | Molecular Weight (Da) |
|--------|--------------------------------|---------------------------------------------|-----------------------|
| PG_164 | 2'',3''-Diacetyl-O-betonyoside | (compound 5) – (28)<br>(compound 74) – (31) | 868.832               |

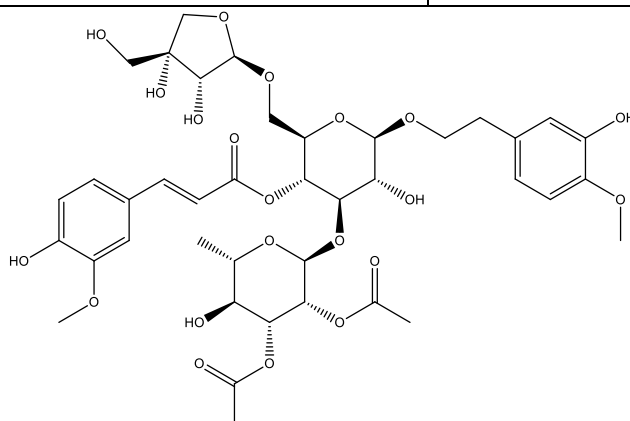

| Code   | Compound                       | Reference                                   | Molecular Weight (Da) |
|--------|--------------------------------|---------------------------------------------|-----------------------|
| PG_165 | 3'',4''-Diacetyl-O-betonyoside | (compound 6) – (28)<br>(compound 75) – (31) | 868832                |

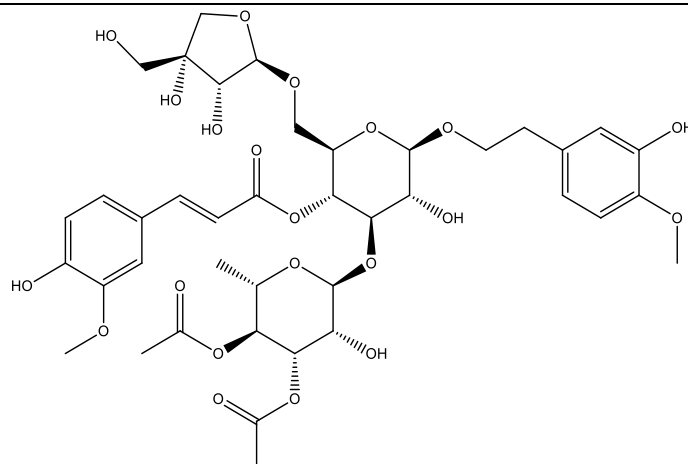

| Code   | Compound            | Reference           | Molecular Weight (Da) |
|--------|---------------------|---------------------|-----------------------|
| PG_166 | Cistantubulosides A | (compound 7) – (28) | 770.731               |

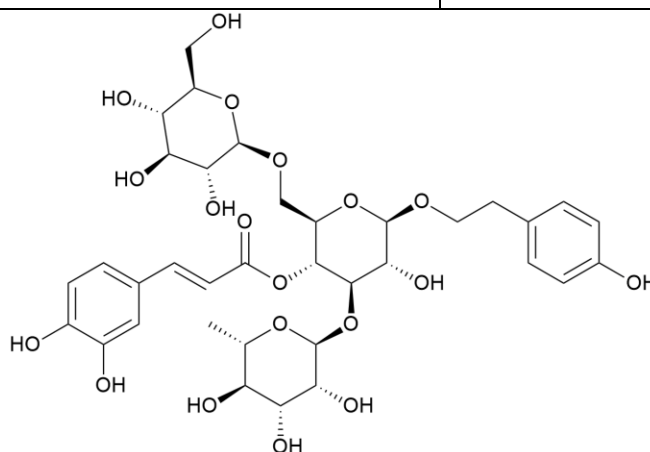

| Code   | Compound                | Reference           | Molecular Weight (Da) |
|--------|-------------------------|---------------------|-----------------------|
| PG_167 | Cistantubulosides B1/B2 | (compound 8) – (28) | 770.731               |

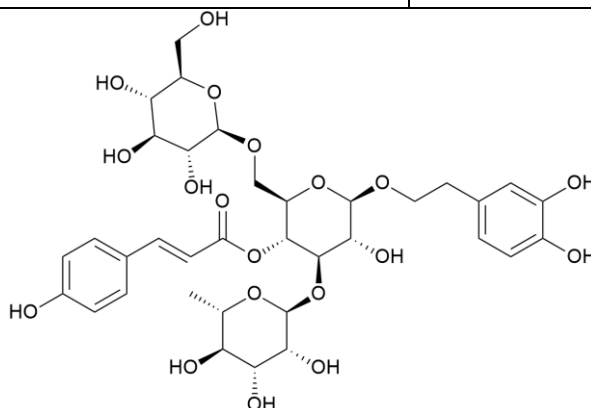

| Code                                                                                 | Compound        | Reference            | Molecular Weight (Da) |
|--------------------------------------------------------------------------------------|-----------------|----------------------|-----------------------|
| PG_168                                                                               | Dolichandroside | (compound 9) – (28)  | 772.747               |
| 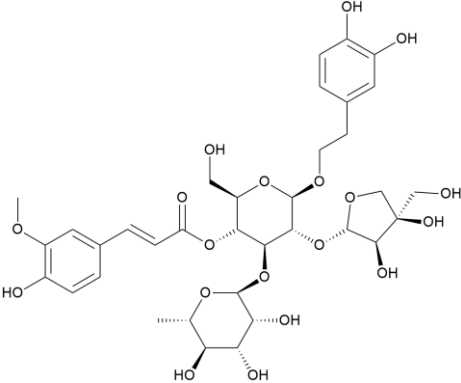   |                 |                      |                       |
| Code                                                                                 | Compound        | Reference            | Molecular Weight (Da) |
| PG_169                                                                               | Lamiusides B    | (compound 11) – (28) | 802.773               |
|  |                 |                      |                       |
| Code                                                                                 | Compound        | Reference            | Molecular Weight (Da) |
| PG_170                                                                               | Lamiusides C    | (compound 12) – (28) | 786.73                |

| 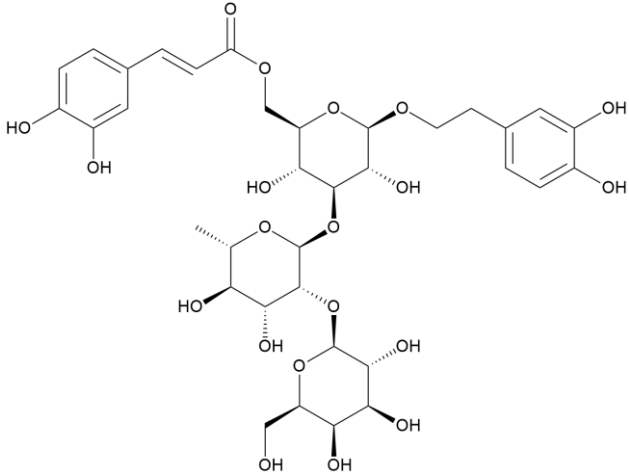   |                  |                      |                       |
|--------------------------------------------------------------------------------------|------------------|----------------------|-----------------------|
| Code                                                                                 | Compound         | Reference            | Molecular Weight (Da) |
| PG_171                                                                               | Lamiusides E     | (compound 13) – (28) | 814.784               |
|   |                  |                      |                       |
| Code                                                                                 | Compound         | Reference            | Molecular Weight (Da) |
| PG_172                                                                               | Newbouldioside A | (compound 14) – (28) | 774.719               |
|  |                  |                      |                       |
| Code                                                                                 | Compound         | Reference            | Molecular Weight (Da) |

| PG_173                                                                              | Newbouldioside B | (compound 15) –<br>(28) | 952.906               |
|-------------------------------------------------------------------------------------|------------------|-------------------------|-----------------------|
| 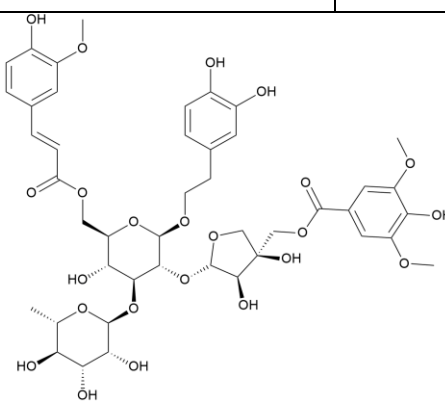  |                  |                         |                       |
| Code                                                                                | Compound         | Reference               | Molecular Weight (Da) |
| PG_174                                                                              | Kankanosides F   | (compound 16) –<br>(28) | 624.587               |
|  |                  |                         |                       |
| Code                                                                                | Compound         | Reference               | Molecular Weight (Da) |
| PG_175                                                                              | Kankanosides G   | (compound 17) –<br>(28) | 608.591               |



| 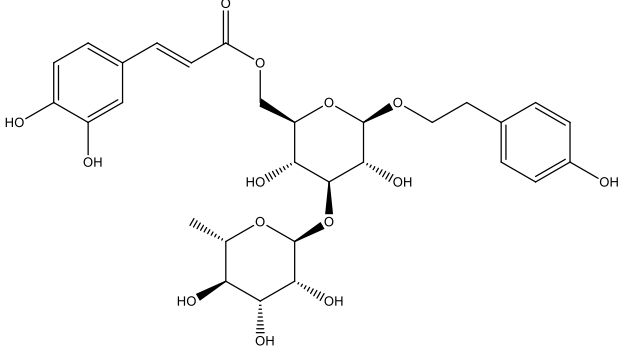   |                |                      |                       |
|--------------------------------------------------------------------------------------|----------------|----------------------|-----------------------|
| Code                                                                                 | Compound       | Reference            | Molecular Weight (Da) |
| PG_176                                                                               | Trichotomoside | (compound 18) – (28) | 914.904               |
|   |                |                      |                       |
| Code                                                                                 | Compound       | Reference            | Molecular Weight (Da) |
| PG_177                                                                               | Picfeosides A  | (compound 19) – (28) | 726.722               |
|  |                |                      |                       |
| Code                                                                                 | Compound       | Reference            | Molecular Weight (Da) |
| PG_178                                                                               | Picfeosides B  | (compound 20) – (28) | 724.706               |

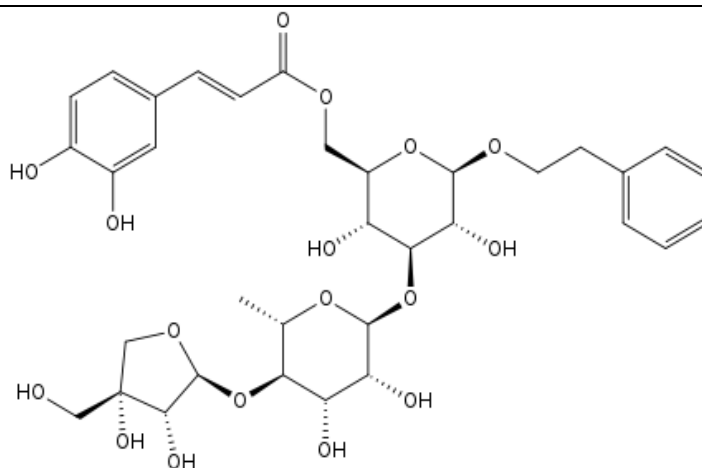

| Code   | Compound      | Reference            | Molecular Weight (Da) |
|--------|---------------|----------------------|-----------------------|
| PG_179 | Picfeosides C | (compound 21) – (28) | 562.563               |

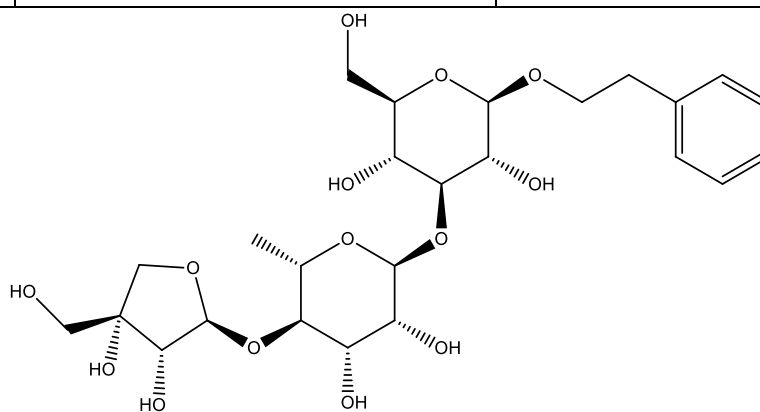

| Code   | Compound    | Reference            | Molecular Weight (Da) |
|--------|-------------|----------------------|-----------------------|
| PG_180 | Phlinside F | (compound 22) – (28) | 768.759               |

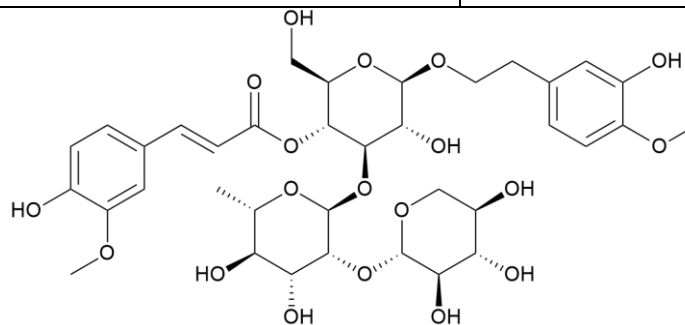

| Code | Compound | Reference | Molecular Weight (Da) |
|------|----------|-----------|-----------------------|
|      |          |           |                       |

| PG_181                                                                               | Z-tubuloside E                  | (compound 23) –<br>(28) | 650.628               |
|--------------------------------------------------------------------------------------|---------------------------------|-------------------------|-----------------------|
| 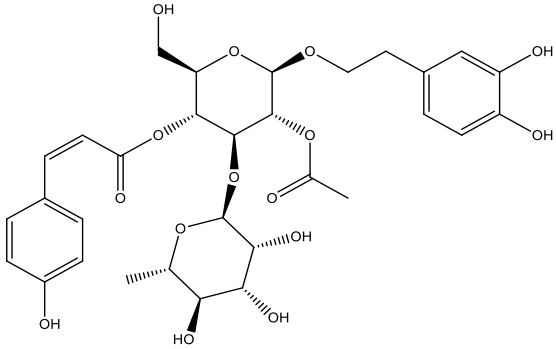   |                                 |                         |                       |
| Code                                                                                 | Compound                        | Reference               | Molecular Weight (Da) |
| PG_182                                                                               | Myricoside - 3'''-O-methylether | (compound 24) –<br>(28) | 770.731               |
|   |                                 |                         |                       |
| Code                                                                                 | Compound                        | Reference               | Molecular Weight (Da) |
| PG_183                                                                               | Buddleoside A                   | (compound 25) –<br>(28) | 934.891               |
|  |                                 |                         |                       |
| Code                                                                                 | Compound                        | Reference               | Molecular Weight (Da) |

| PG_184                                                                               | Velutinoside III                                                                                                                       | (compound 26) – (28) | 948.914               |
|--------------------------------------------------------------------------------------|----------------------------------------------------------------------------------------------------------------------------------------|----------------------|-----------------------|
| 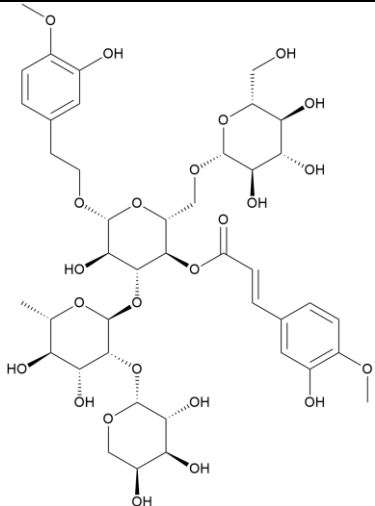   |                                                                                                                                        |                      |                       |
| Code                                                                                 | Compound                                                                                                                               | Reference            | Molecular Weight (Da) |
| PG_185                                                                               | Velutinoside IVIV                                                                                                                      | (compound 27) – (28) | 784.758               |
|  |                                                                                                                                        |                      |                       |
| Code                                                                                 | Compound                                                                                                                               | Reference            | Molecular Weight (Da) |
| PG_186                                                                               | 2-(3-Methoxy-4-hydroxyphenyl)ethyl-O- 2",3"-diacetyl- $\alpha$ -L-rhamnopyranosyl (1-->3)-4-O-(E)-feruloyl- $\beta$ -D-glucopyranoside | (compound 28) – (28) | 736.717               |

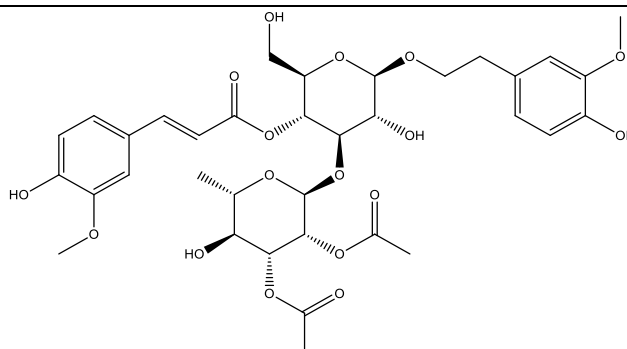

| Code   | Compound                                      | Reference            | Molecular Weight (Da) |
|--------|-----------------------------------------------|----------------------|-----------------------|
| PG_187 | 4-O- $\alpha$ -L-Rhamnopyranosylcistanoside E | (compound 29) – (28) | 608.588               |

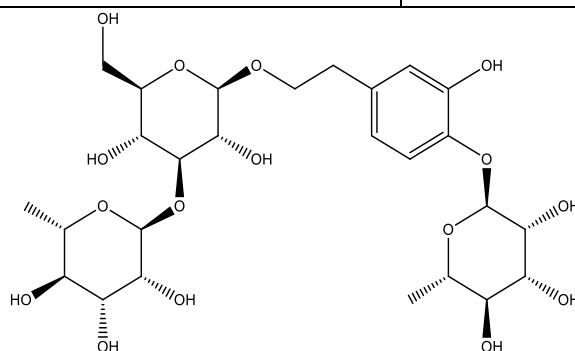

| Code   | Compound         | Reference            | Molecular Weight (Da) |
|--------|------------------|----------------------|-----------------------|
| PG_188 | Lunariifolioside | (compound 30) – (28) | 888.819               |

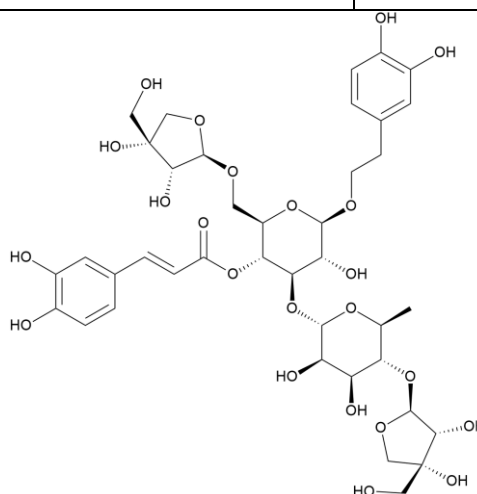

| Code | Compound | Reference | Molecular Weight (Da) |
|------|----------|-----------|-----------------------|
|      |          |           |                       |

| PG_189                                                                                                                                                                                                                                                                                                                                                                                                                                                                                                                                                                                                                                                                                                                                                                                  | Globusintenoside         | (compound 31) –<br>(28) | 962.901               |
|-----------------------------------------------------------------------------------------------------------------------------------------------------------------------------------------------------------------------------------------------------------------------------------------------------------------------------------------------------------------------------------------------------------------------------------------------------------------------------------------------------------------------------------------------------------------------------------------------------------------------------------------------------------------------------------------------------------------------------------------------------------------------------------------|--------------------------|-------------------------|-----------------------|
| 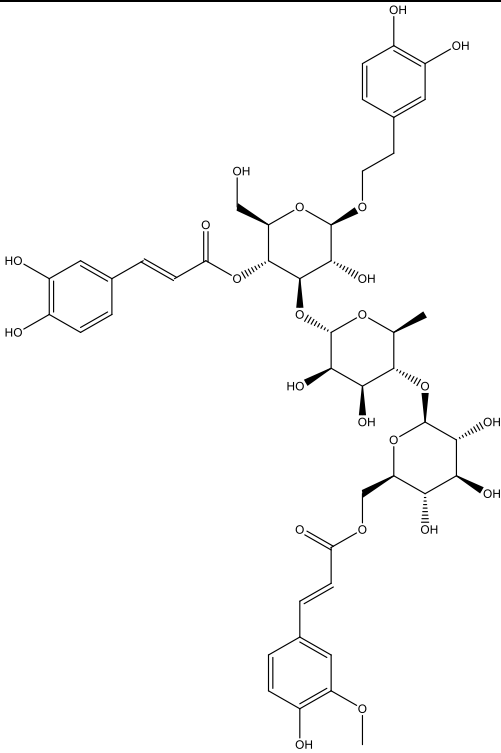 <p>The structure of Globusintenoside is a complex polyphenolic glycoside. It features a central core of three pyranose rings linked by glycosidic bonds. The top ring is substituted with a 3,4,5-trihydroxybenzyl group at the C1 position and a 3,4-dihydroxybenzyl group at the C2 position. The middle ring is substituted with a 3,4-dihydroxybenzyl group at the C1 position and a 3,4-dihydroxybenzyl group at the C2 position. The bottom ring is substituted with a 3,4-dihydroxybenzyl group at the C1 position and a 3,4-dihydroxybenzyl group at the C2 position. The structure is highly symmetrical and contains multiple hydroxyl groups.</p>                                        |                          |                         |                       |
| Code                                                                                                                                                                                                                                                                                                                                                                                                                                                                                                                                                                                                                                                                                                                                                                                    | Compound                 | Reference               | Molecular Weight (Da) |
| PG_190                                                                                                                                                                                                                                                                                                                                                                                                                                                                                                                                                                                                                                                                                                                                                                                  | 2",3"-Diacetyl acteoside | (compound 32) –<br>(28) | 710.679               |
|  <p>The structure of 2",3"-Diacetyl acteoside is a complex polyphenolic glycoside. It features a central core of three pyranose rings linked by glycosidic bonds. The top ring is substituted with a 3,4,5-trihydroxybenzyl group at the C1 position and a 3,4-dihydroxybenzyl group at the C2 position. The middle ring is substituted with a 3,4-dihydroxybenzyl group at the C1 position and a 3,4-dihydroxybenzyl group at the C2 position. The bottom ring is substituted with a 3,4-dihydroxybenzyl group at the C1 position and a 3,4-dihydroxybenzyl group at the C2 position. The structure is highly symmetrical and contains multiple hydroxyl groups.</p> |                          |                         |                       |
| Code                                                                                                                                                                                                                                                                                                                                                                                                                                                                                                                                                                                                                                                                                                                                                                                    | Compound                 | Reference               | Molecular Weight (Da) |
| PG_191                                                                                                                                                                                                                                                                                                                                                                                                                                                                                                                                                                                                                                                                                                                                                                                  | Caerulescenoside         | (compound 33) –<br>(28) | 788.746               |

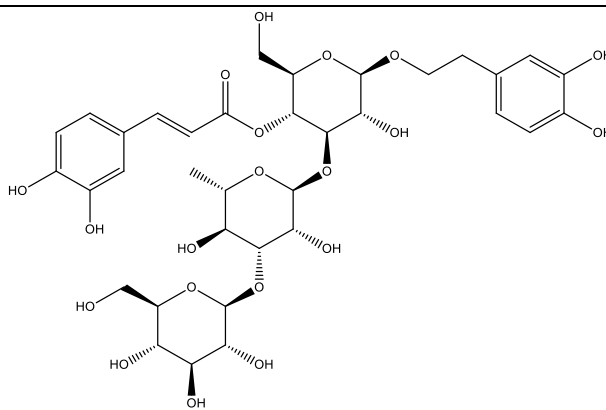

| Code   | Compound         | Reference            | Molecular Weight (Da) |
|--------|------------------|----------------------|-----------------------|
| PG_192 | Isocistanoside C | (compound 34) – (28) | 638.617               |

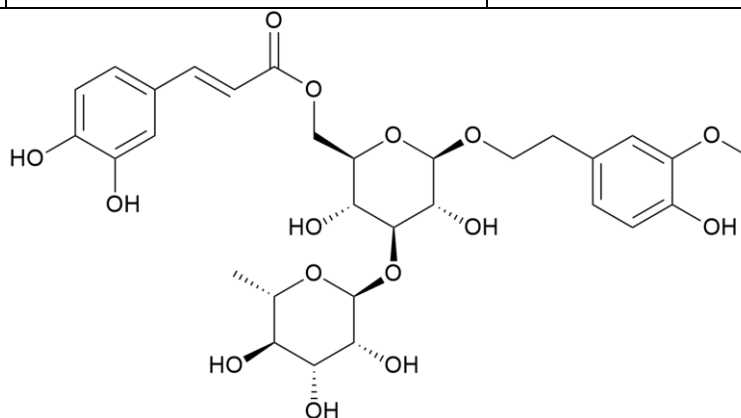

| Code   | Compound          | Reference            | Molecular Weight (Da) |
|--------|-------------------|----------------------|-----------------------|
| PG_193 | Epimeridinoside A | (compound 35) – (28) | 652.644               |

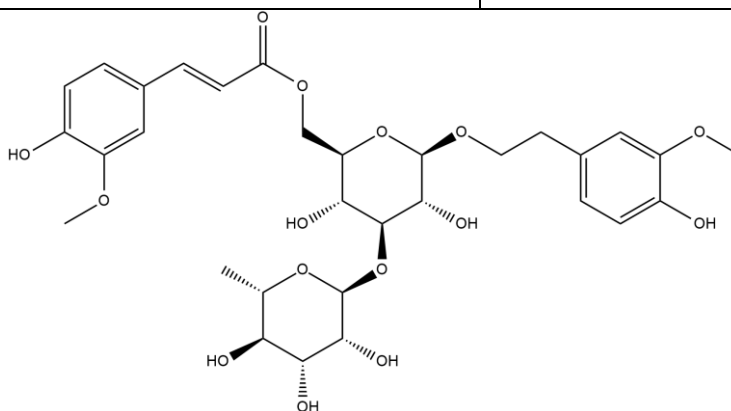

| Code | Compound | Reference | Molecular Weight (Da) |
|------|----------|-----------|-----------------------|
|      |          |           |                       |

| PG_194 | Velutinosides II   | (compound 37) –<br>(28) | 934.888               |
|--------|--------------------|-------------------------|-----------------------|
|        |                    |                         |                       |
| Code   | Compound           | Reference               | Molecular Weight (Da) |
| PG_195 | Ligurobustosides M | (compound 38) –<br>(28) | 608.588               |
|        |                    |                         |                       |
| Code   | Compound           | Reference               | Molecular Weight (Da) |
| PG_196 | Ligurobustosides N | (compound 39) –<br>(28) | 770.731               |



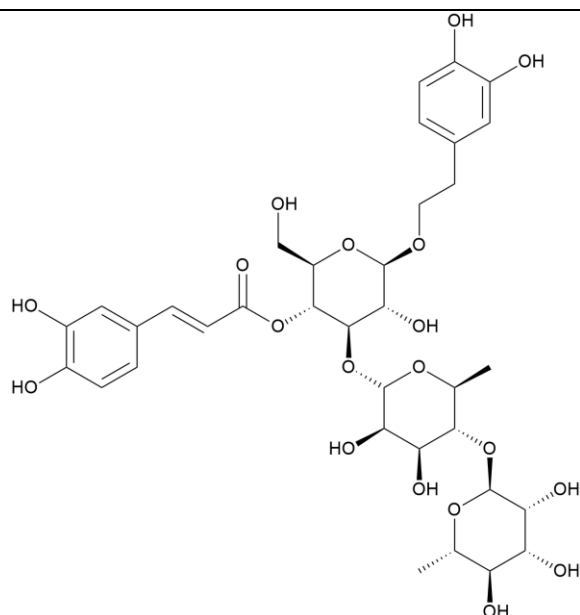

| Code   | Compound                       | Reference            | Molecular Weight (Da) |
|--------|--------------------------------|----------------------|-----------------------|
| PG_197 | Teucrioside-3'''-O-methylether | (compound 40) – (28) | 770.731               |

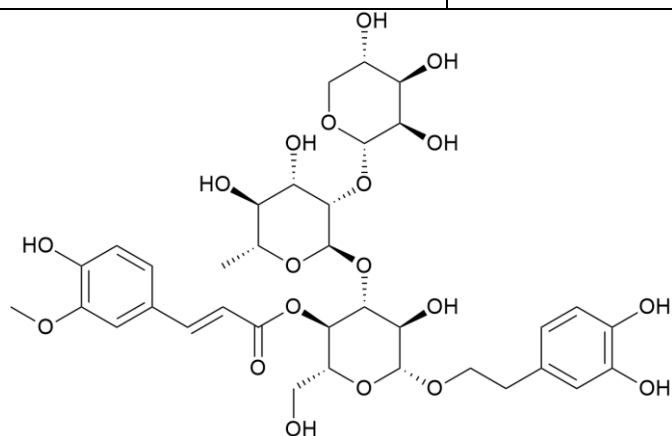

| Code   | Compound                              | Reference            | Molecular Weight (Da) |
|--------|---------------------------------------|----------------------|-----------------------|
| PG_198 | Teucrioside-3''',4'''-O-dimethylether | (compound 41) – (28) | 786.774               |

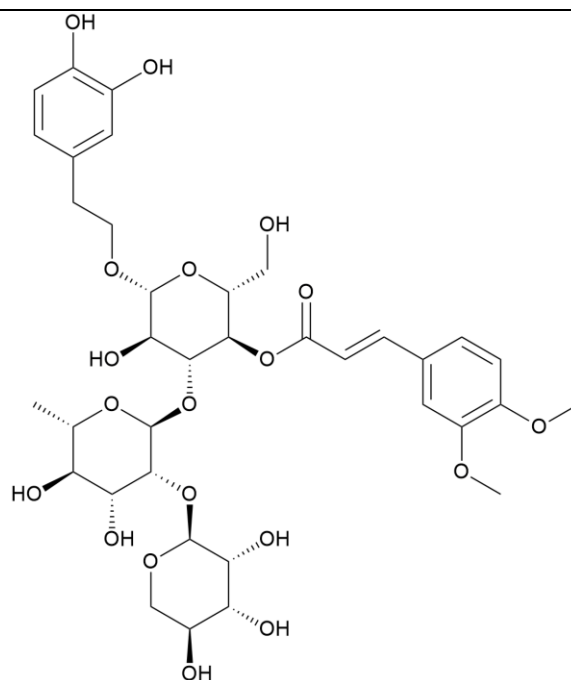

| Code   | Compound                                    | Reference            | Molecular Weight (Da) |
|--------|---------------------------------------------|----------------------|-----------------------|
| PG_199 | 6'-O-acetylacteoside (or 6'-O-verbascoside) | (compound 42) – (28) | 666.627               |

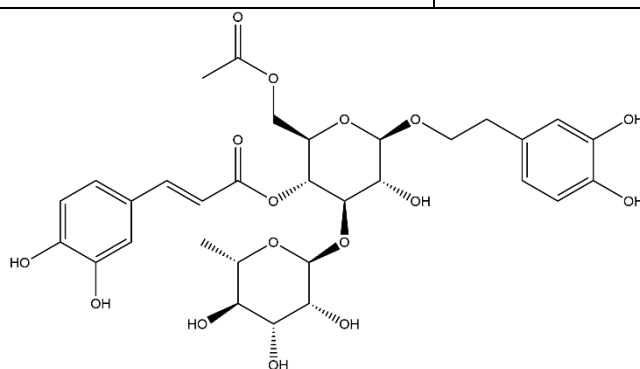

| Code   | Compound                     | Reference            | Molecular Weight (Da) |
|--------|------------------------------|----------------------|-----------------------|
| PG_200 | 2'-O, 6'-O-Diacetylacteoside | (compound 43) – (28) | 708.664               |

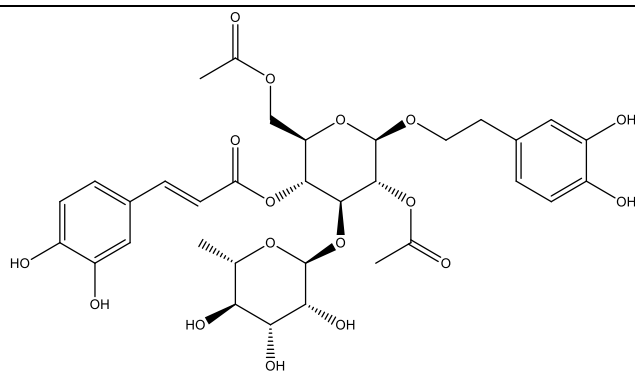

| Code   | Compound            | Reference            | Molecular Weight (Da) |
|--------|---------------------|----------------------|-----------------------|
| PG_201 | Integrifoliosides A | (compound 44) – (28) | 770.731               |

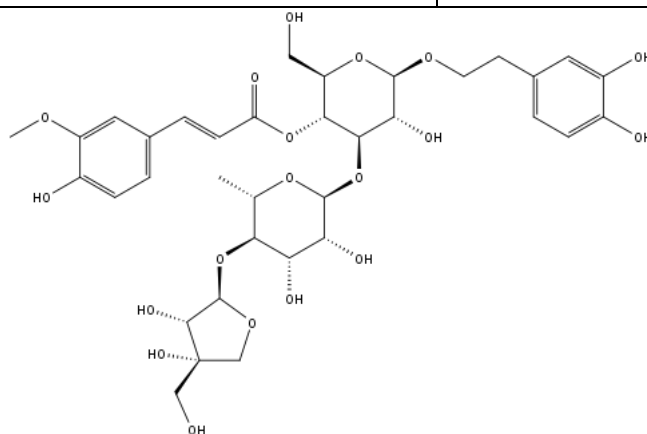

| Code   | Compound            | Reference            | Molecular Weight (Da) |
|--------|---------------------|----------------------|-----------------------|
| PG_202 | Integrifoliosides B | (compound 45) – (28) | 784.758               |

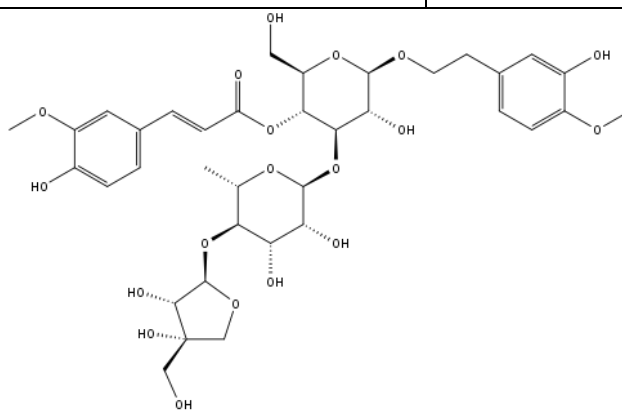

| Code | Compound | Reference | Molecular Weight (Da) |
|------|----------|-----------|-----------------------|
|      |          |           |                       |

|        |                   |                         |                       |
|--------|-------------------|-------------------------|-----------------------|
| PG_203 | Wiedemannioside B | (compound 47) –<br>(28) | 778.798               |
|        |                   |                         |                       |
| Code   | Compound          | Reference               | Molecular Weight (Da) |
| PG_204 | Wiedemannioside C | (compound 48) –<br>(28) | 800.757               |
|        |                   |                         |                       |
| Code   | Compound          | Reference               | Molecular Weight (Da) |
| PG_205 | Wiedemannioside D | (compound 49) –<br>(28) | 826.795               |
|        |                   |                         |                       |

| Code                                                                                                                                                                                                                                                                                                                                                                                                                                                                                                                                                                                                                                                 | Compound          | Reference            | Molecular Weight (Da) |
|------------------------------------------------------------------------------------------------------------------------------------------------------------------------------------------------------------------------------------------------------------------------------------------------------------------------------------------------------------------------------------------------------------------------------------------------------------------------------------------------------------------------------------------------------------------------------------------------------------------------------------------------------|-------------------|----------------------|-----------------------|
| PG_206                                                                                                                                                                                                                                                                                                                                                                                                                                                                                                                                                                                                                                               | Wiedemannioside E | (compound 50) – (28) | 856.821               |
| 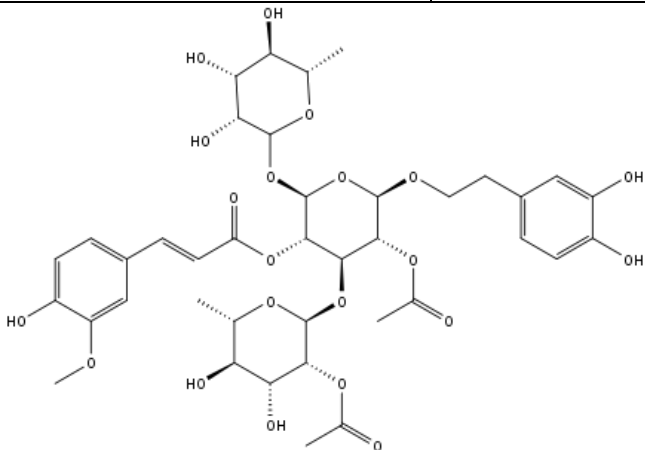 <p>The structure of Wiedemannioside E is a complex glycoside. It features a central disaccharide core consisting of a glucose unit linked to a galactose unit. The glucose unit is substituted with a p-coumaroyl group at C2, an acetyl group at C3, and a 3,4,5-trihydroxyphenylethyl group at C6. The galactose unit is substituted with an acetyl group at C2 and a 3,4,5-trihydroxyphenylethyl group at C6. The galactose unit is further linked to a glucose unit at C4, which is substituted with a p-coumaroyl group at C2 and an acetyl group at C3.</p> |                   |                      |                       |
| Code                                                                                                                                                                                                                                                                                                                                                                                                                                                                                                                                                                                                                                                 | Compound          | Reference            | Molecular Weight (Da) |
| PG_207                                                                                                                                                                                                                                                                                                                                                                                                                                                                                                                                                                                                                                               | Verpectoside A    | (compound 51) – (28) | 638.617               |
|  <p>The structure of Verpectoside A is a glycoside consisting of a glucose unit linked to a galactose unit. The glucose unit is substituted with a p-coumaroyl group at C2 and a 3,4,5-trihydroxyphenylethyl group at C6. The galactose unit is substituted with a hydroxyl group at C2 and a 3,4,5-trihydroxyphenylethyl group at C6.</p>                                                                                                                                                                                                                       |                   |                      |                       |
| Code                                                                                                                                                                                                                                                                                                                                                                                                                                                                                                                                                                                                                                                 | Compound          | Reference            | Molecular Weight (Da) |
| PG_208                                                                                                                                                                                                                                                                                                                                                                                                                                                                                                                                                                                                                                               | Verpectoside B    | (compound 52) – (28) | 786.73                |

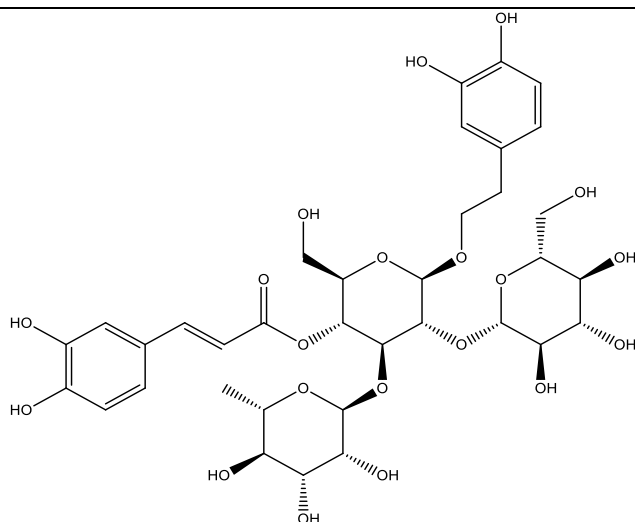

| Code   | Compound       | Reference            | Molecular Weight (Da) |
|--------|----------------|----------------------|-----------------------|
| PG_209 | Verpectoside C | (compound 53) – (28) | 800.757               |

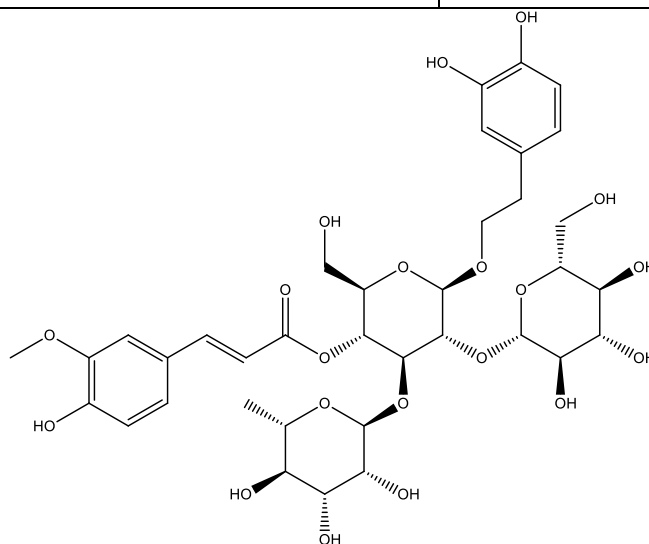

| Code   | Compound                 | Reference            | Molecular Weight (Da) |
|--------|--------------------------|----------------------|-----------------------|
| PG_210 | 6''-O-Acetylverbascoside | (compound 54) – (28) | 668.643               |

| 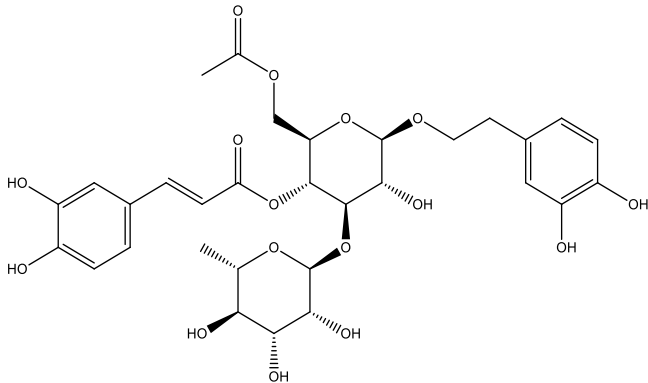   |                           |                      |                       |
|--------------------------------------------------------------------------------------|---------------------------|----------------------|-----------------------|
| Code                                                                                 | Compound                  | Reference            | Molecular Weight (Da) |
| PG_211                                                                               | 4'''-O-Acetylverbascoside | (compound 55) – (28) | 666.627               |
|   |                           |                      |                       |
| Code                                                                                 | Compound                  | Reference            | Molecular Weight (Da) |
| PG_212                                                                               | Markhamioside A           | (compound 56) – (28) | 594.561               |
|  |                           |                      |                       |
| Code                                                                                 | Compound                  | Reference            | Molecular Weight (Da) |
| PG_213                                                                               | Markhamioside B           | (compound 57) – (28) | 784.758               |

|                                                                                      |                 |                      |                       |
|--------------------------------------------------------------------------------------|-----------------|----------------------|-----------------------|
| 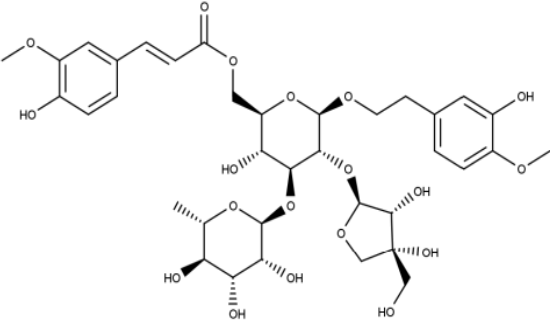   |                 |                      |                       |
| Code                                                                                 | Compound        | Reference            | Molecular Weight (Da) |
| PG_214                                                                               | Markhamioside C | (compound 58) – (28) | 756.704               |
|   |                 |                      |                       |
| Code                                                                                 | Compound        | Reference            | Molecular Weight (Da) |
| PG_215                                                                               | Markhamioside D | (compound 59) – (28) | 798.741               |
|  |                 |                      |                       |
| Code                                                                                 | Compound        | Reference            | Molecular Weight (Da) |
| PG_216                                                                               | Markhamioside E | (compound 60) – (28) | 828.767               |



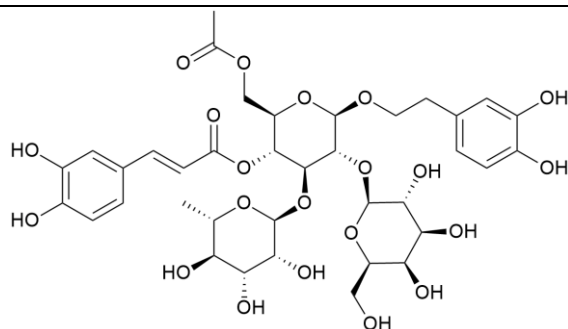

| Code   | Compound    | Reference            | Molecular Weight (Da) |
|--------|-------------|----------------------|-----------------------|
| PG_217 | Marruboside | (compound 61) – (28) | 888.819               |

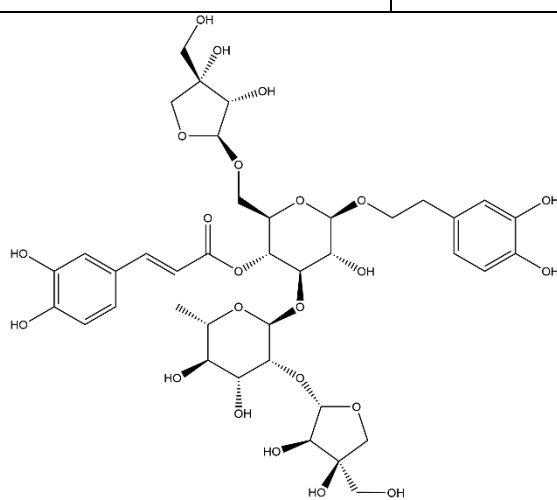

| Code   | Compound                        | Reference            | Molecular Weight (Da) |
|--------|---------------------------------|----------------------|-----------------------|
| PG_218 | 2'',3''-Di-O-acetyl martynoside | (compound 62) – (28) | 736.717               |

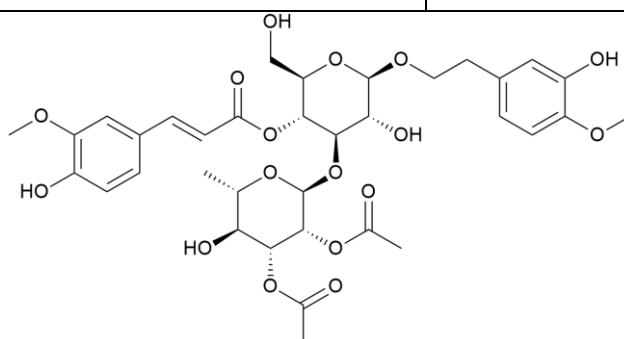

| Code   | Compound                    | Reference            | Molecular Weight (Da) |
|--------|-----------------------------|----------------------|-----------------------|
| PG_219 | 2''-O-β-Apiosylverbascoside | (compound 63) – (28) | 758.72                |

| Code   | Compound        | Reference            | Molecular Weight (Da) |
|--------|-----------------|----------------------|-----------------------|
| PG_220 | Samioside       | (compound 64) – (28) | 756.704               |
|        |                 |                      |                       |
| Code   | Compound        | Reference            | Molecular Weight (Da) |
| PG_221 | Angoroside D    | (compound 65) – (28) | 770.731               |
|        |                 |                      |                       |
| Code   | Compound        | Reference            | Molecular Weight (Da) |
| PG_222 | Serratumoside A | (compound 66) – (28) | 784.758               |

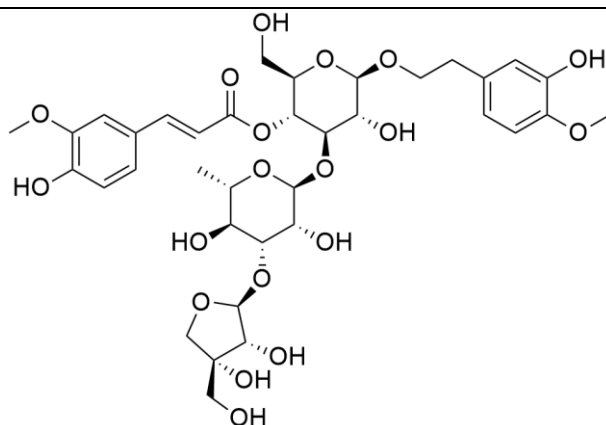

| Code   | Compound   | Reference            | Molecular Weight (Da) |
|--------|------------|----------------------|-----------------------|
| PG_223 | Crassoside | (compound 67) – (28) | 788.746               |

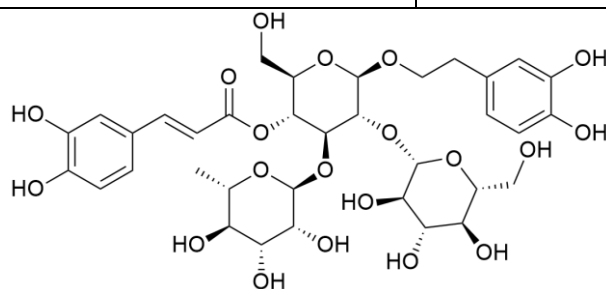

| Code   | Compound        | Reference            | Molecular Weight (Da) |
|--------|-----------------|----------------------|-----------------------|
| PG_224 | Isoangoroside C | (compound 68) – (28) | 784.758               |

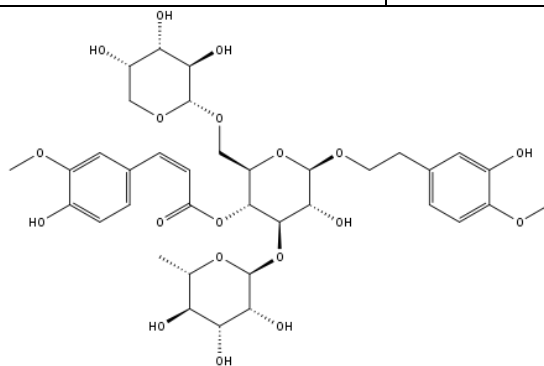

| Code   | Compound     | Reference            | Molecular Weight (Da) |
|--------|--------------|----------------------|-----------------------|
| PG_225 | Incanoside C | (compound 69) – (28) | 800.757               |

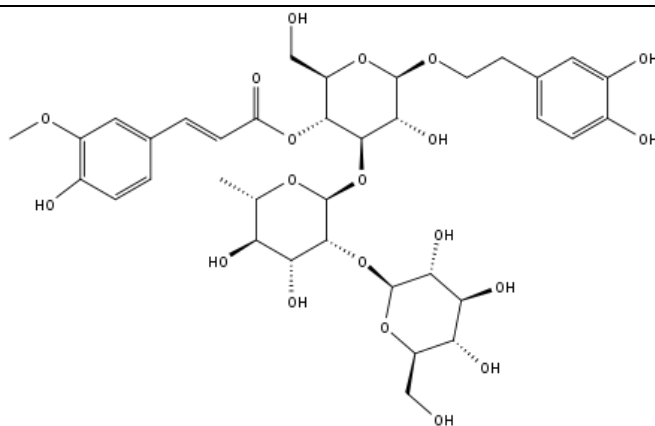

| Code   | Compound     | Reference            | Molecular Weight (Da) |
|--------|--------------|----------------------|-----------------------|
| PG_226 | Incanoside D | (compound 70) – (28) | 814.784               |

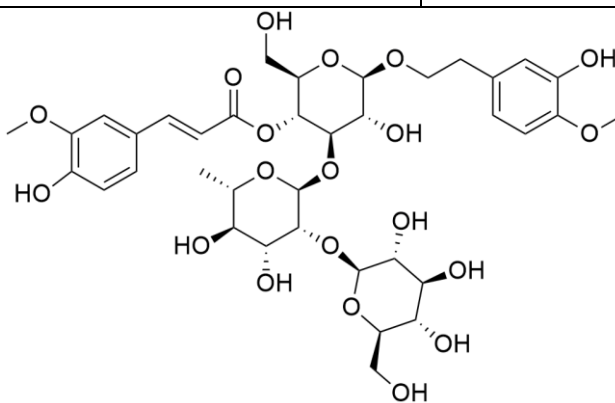

| Code   | Compound     | Reference            | Molecular Weight (Da) |
|--------|--------------|----------------------|-----------------------|
| PG_227 | Incanoside E | (compound 71) – (28) | 814.784               |

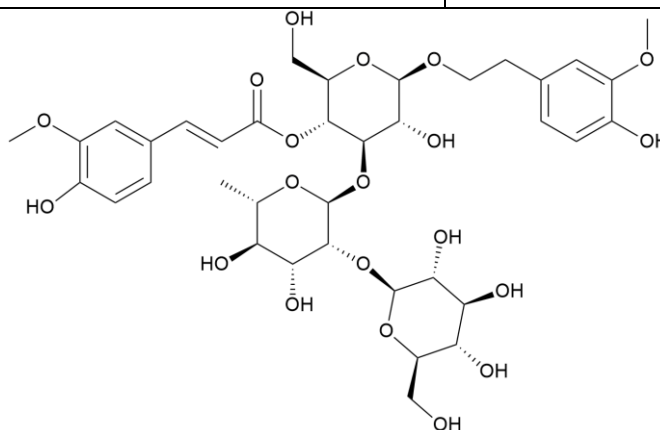

| Code | Compound | Reference | Molecular Weight (Da) |
|------|----------|-----------|-----------------------|
|      |          |           |                       |

| PG_228 | $\beta$ -(3,4-dihydroxyphenyl)-ethyl-O- $\alpha$ -L-rhamnopyranosyl(1 $\rightarrow$ 3)- $\beta$ -D-[ $\beta$ -D-xylopyranosyl(1 $\rightarrow$ 6)]-(4-O-isoferulyl)glucopyranoside             | (compound 72) – (28) | 770.731               |
|--------|-----------------------------------------------------------------------------------------------------------------------------------------------------------------------------------------------|----------------------|-----------------------|
|        |                                                                                                                                                                                               |                      |                       |
| Code   | Compound                                                                                                                                                                                      | Reference            | Molecular Weight (Da) |
| PG_229 | $\beta$ -(3-hydroxy-4-methoxyphenyl)-ethyl- O- $\alpha$ -L-rhamnopyranosyl( 1 $\rightarrow$ 3)- $\beta$ -D-[ $\beta$ - D-glucopyranosyl(1 $\rightarrow$ 6)]- (4-O-isoferulyl) glucopyranoside | (compound 73) – (28) | 814.784               |
|        |                                                                                                                                                                                               |                      |                       |
| Code   | Compound                                                                                                                                                                                      | Reference            | Molecular Weight (Da) |
| PG_230 | Scrophuloside B1                                                                                                                                                                              | (compound 75) – (28) | 770.731               |

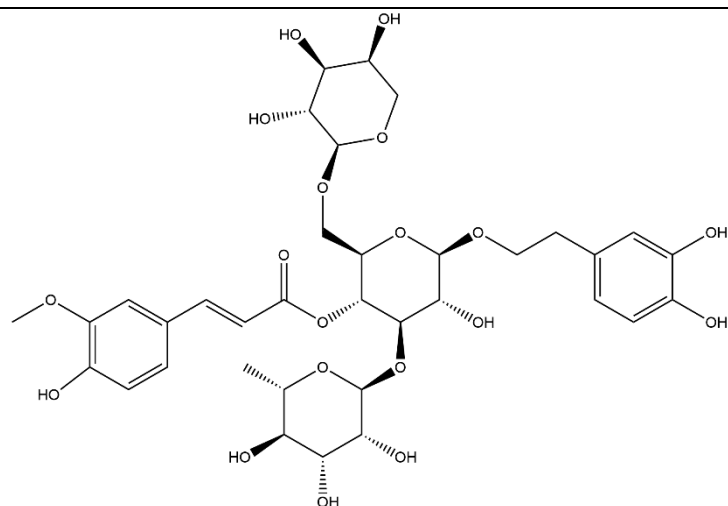

| Code   | Compound         | Reference            | Molecular Weight (Da) |
|--------|------------------|----------------------|-----------------------|
| PG_231 | Scrophuloside B2 | (compound 76) – (28) | 770.731               |

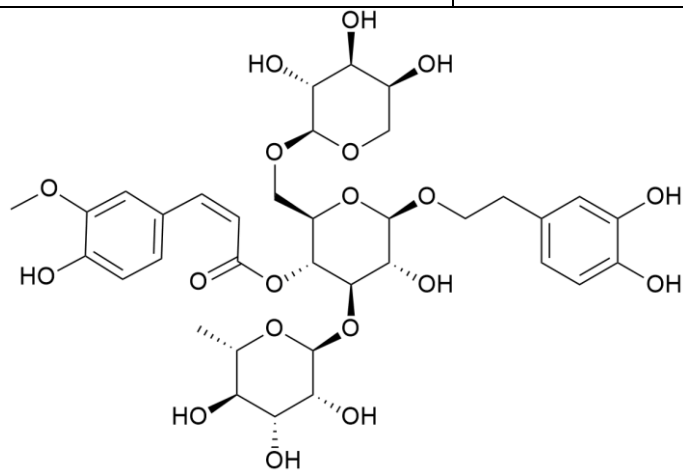

| Code   | Compound           | Reference            | Molecular Weight (Da) |
|--------|--------------------|----------------------|-----------------------|
| PG_232 | Trichosanthiside A | (compound 77) – (28) | 756.704               |

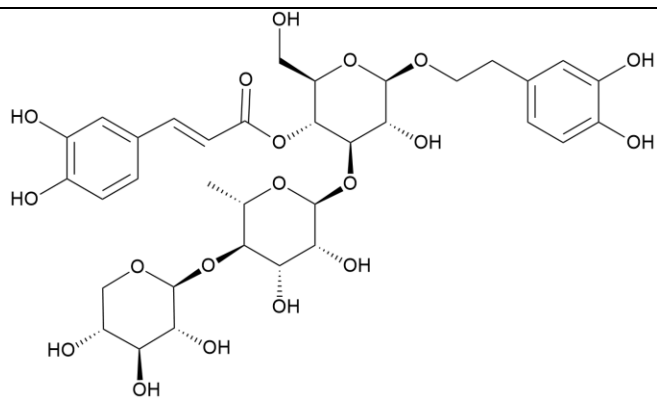

| Code   | Compound           | Reference            | Molecular Weight (Da) |
|--------|--------------------|----------------------|-----------------------|
| PG_233 | Trichosanthiside B | (compound 78) – (28) | 888.819               |

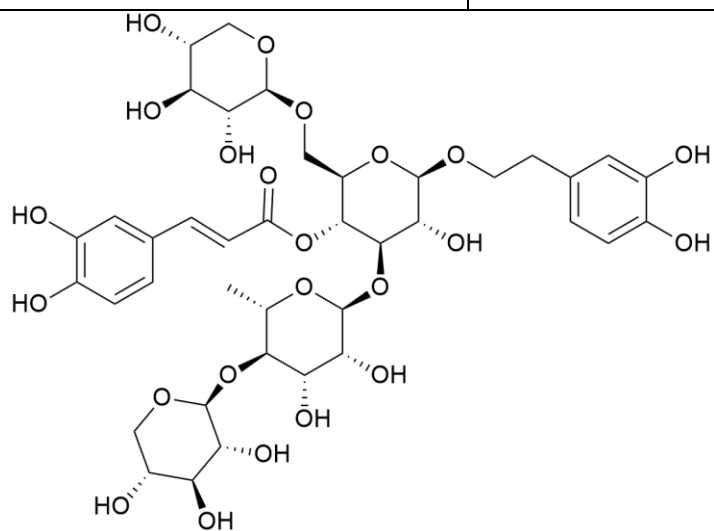

| Code   | Compound         | Reference            | Molecular Weight (Da) |
|--------|------------------|----------------------|-----------------------|
| PG_234 | Isobetonyoside F | (compound 79) – (28) | 756.704               |

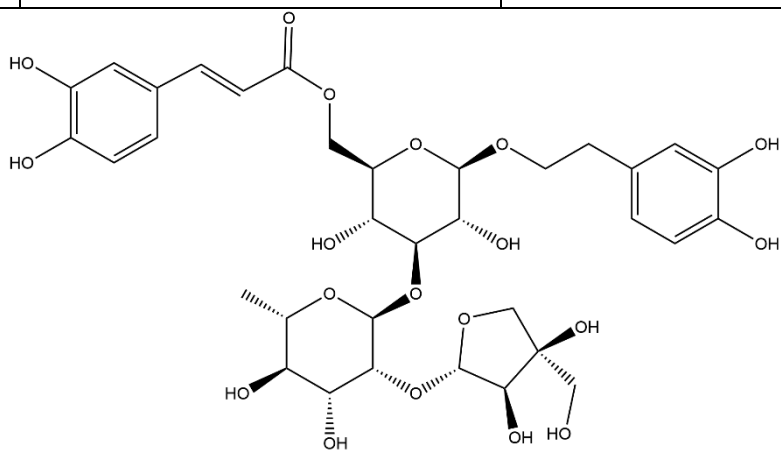

| Code   | Compound                                   | Reference            | Molecular Weight (Da) |
|--------|--------------------------------------------|----------------------|-----------------------|
| PG_235 | 6'- $\beta$ -D-Apiofuranosyl cistanoside C | (compound 80) – (28) | 770.731               |
|        |                                            |                      |                       |
| Code   | Compound                                   | Reference            | Molecular Weight (Da) |
| PG_236 | Cis-lamiophlomiside A                      | (compound 81) – (28) | 784.758               |
|        |                                            |                      |                       |
| Code   | Compound                                   | Reference            | Molecular Weight (Da) |
| PG_237 | Cis-martynoside                            | (compound 82) – (28) | 652.644               |



| 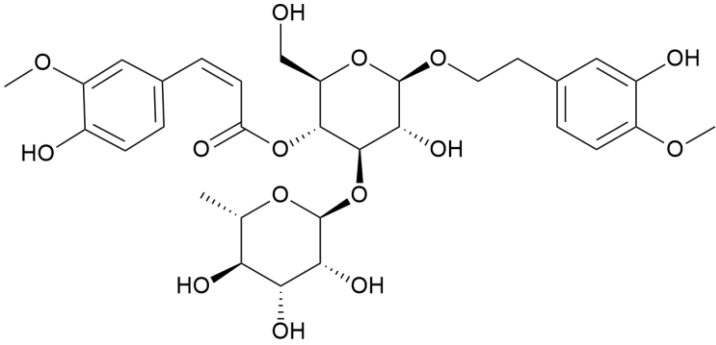   |                       |                      |                       |
|--------------------------------------------------------------------------------------|-----------------------|----------------------|-----------------------|
| Code                                                                                 | Compound              | Reference            | Molecular Weight (Da) |
| PG_238                                                                               | Cis-leucosceptoside A | (compound 83) – (28) | 638.617               |
|   |                       |                      |                       |
| Code                                                                                 | Compound              | Reference            | Molecular Weight (Da) |
| PG_239                                                                               | Ferruginoside C       | (compound 84) – (28) | 798.785               |
|  |                       |                      |                       |
| Code                                                                                 | Compound              | Reference            | Molecular Weight (Da) |
| PG_240                                                                               | Incanoside            | (compound 85) – (28) | 786.73                |

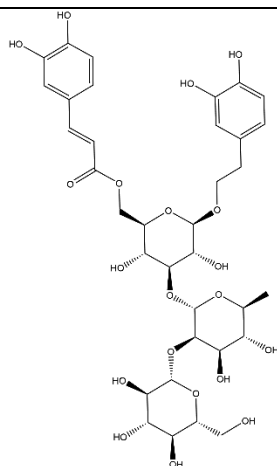

| Code   | Compound    | Reference            | Molecular Weight (Da) |
|--------|-------------|----------------------|-----------------------|
| PG_241 | Luteoside A | (compound 86) – (28) | 798.741               |

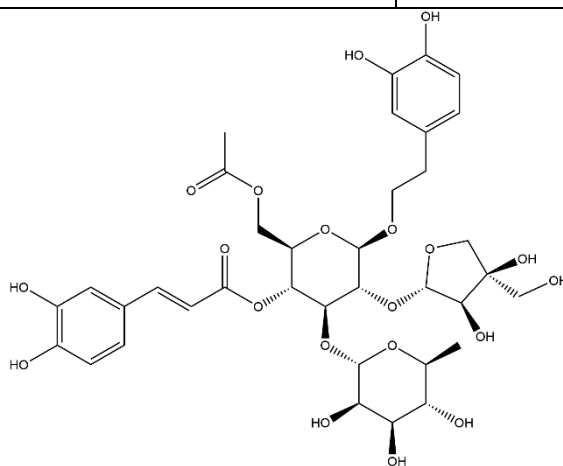

| Code   | Compound    | Reference            | Molecular Weight (Da) |
|--------|-------------|----------------------|-----------------------|
| PG_242 | Luteoside B | (compound 87) – (28) | 756.704               |

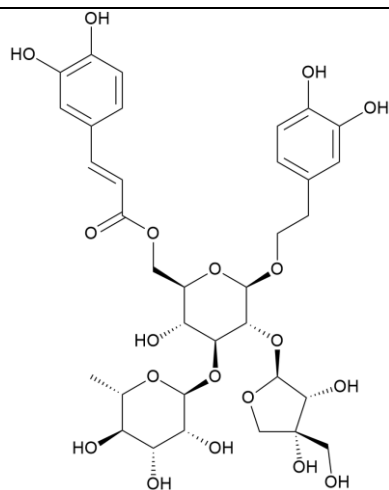

| Code   | Compound                       | Reference            | Molecular Weight (Da) |
|--------|--------------------------------|----------------------|-----------------------|
| PG_243 | Luteoside C                    | (compound 88) – (28) | 770.731               |
|        |                                |                      |                       |
| Code   | Compound                       | Reference            | Molecular Weight (Da) |
| PG_244 | 6'-O-(E)-Cinnamoylverbascoside | (compound 89) – (28) | 754.735               |
|        |                                |                      |                       |
| Code   | Compound                       | Reference            | Molecular Weight (Da) |
| PG_245 | Galactosylmartynoside          | (compound 90) – (28) | 814.784               |

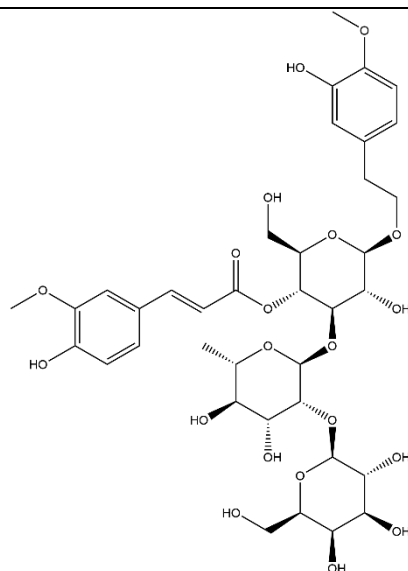

| Code   | Compound                                                                                                                                           | Reference            | Molecular Weight (Da) |
|--------|----------------------------------------------------------------------------------------------------------------------------------------------------|----------------------|-----------------------|
| PG_246 | 2-(3-Hydroxy-4-methoxyphenyl)-ethyl-O-( $\alpha$ -L-rhamnosyl)-(1->3)-O-( $\alpha$ -L-rhamnosyl)-(1->6)-4-O-E-feruloyl- $\beta$ -D-glucopyranoside | (compound 91) – (28) | 798.785               |

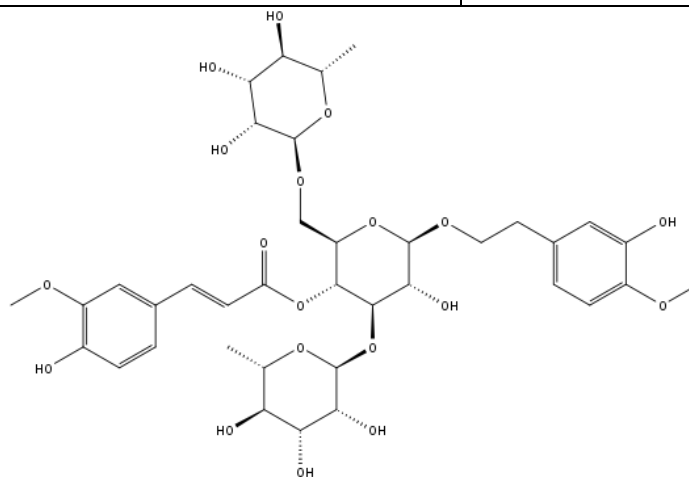

| Code   | Compound     | Reference            | Molecular Weight (Da) |
|--------|--------------|----------------------|-----------------------|
| PG_247 | Incanoside A | (compound 92) – (28) | 814.784               |

| Code   | Compound                | Reference            | Molecular Weight (Da) |
|--------|-------------------------|----------------------|-----------------------|
| PG_248 | Incanoside B            | (compound 93) – (28) | 638.613               |
|        |                         |                      |                       |
| Code   | Compound                | Reference            | Molecular Weight (Da) |
| PG_249 | 6'-O-Acetyl-martynoside | (compound 94) – (28) | 694.68                |
|        |                         |                      |                       |
| Code   | Compound                | Reference            | Molecular             |

|                                                                                      |                            |                      |                       |
|--------------------------------------------------------------------------------------|----------------------------|----------------------|-----------------------|
|                                                                                      |                            |                      | Weight (Da)           |
| PG_250                                                                               | Ballotetroside             | (compound 95) – (28) | 890.835               |
| 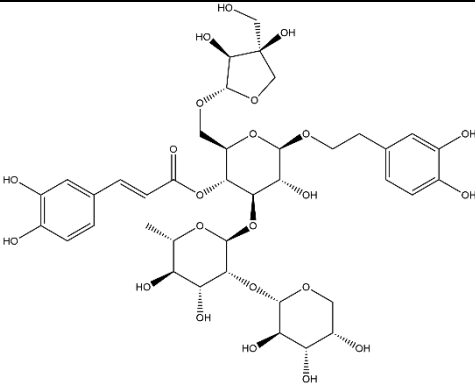   |                            |                      |                       |
| Code                                                                                 | Compound                   | Reference            | Molecular Weight (Da) |
| PG_251                                                                               | Newbouldioside             | (compound 96) – (28) | 772.747               |
|   |                            |                      |                       |
| Code                                                                                 | Compound                   | Reference            | Molecular Weight (Da) |
| PG_252                                                                               | Premnethanosides A (trans) | (compound 97) – (28) | 898.858               |
|  |                            |                      |                       |
| Code                                                                                 | Compound                   | Reference            | Molecular             |

|        |                                                                                                                                 |                       | Weight (Da)           |
|--------|---------------------------------------------------------------------------------------------------------------------------------|-----------------------|-----------------------|
| PG_253 | Premnethanosides A (cis)                                                                                                        | (compound 98) – (28)  | 900.874               |
|        |                                                                                                                                 |                       |                       |
| Code   | Compound                                                                                                                        | Reference             | Molecular Weight (Da) |
| PG_254 | cis-isoverbascoside                                                                                                             | (compound 99) – (28)  | 624.59                |
|        |                                                                                                                                 |                       |                       |
| Code   | Compound                                                                                                                        | Reference             | Molecular Weight (Da) |
| PG_255 | 2-(4-Hydroxy-3-methoxyphenyl) ethanol 1- <i>O</i> -[ $\beta$ -D-apiofuranosyl-(1 $\rightarrow$ 6)- $\beta$ -D- glucopyranoside] | (compound 100) – (28) | 462.446               |
|        |                                                                                                                                 |                       |                       |

| Code                                                                                 | Compound                                                                                                                    | Reference                | Molecular Weight (Da) |
|--------------------------------------------------------------------------------------|-----------------------------------------------------------------------------------------------------------------------------|--------------------------|-----------------------|
| PG_256                                                                               | 2-(3,4-Dihydroxyphenyl) ethanol<br>1- <i>O</i> -[ $\beta$ -D-apiofuranosyl-(1 $\rightarrow$ 6)- $\beta$ -D-glucopyranoside] | (compound 101) –<br>(28) | 448.419               |
| 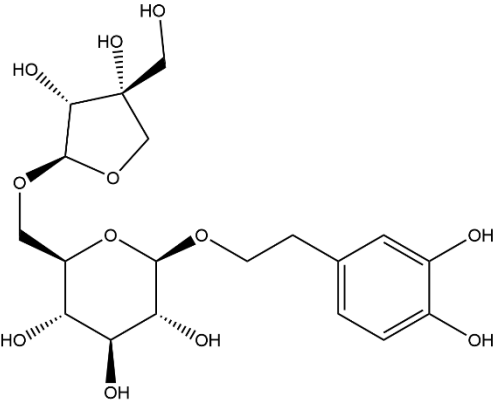   |                                                                                                                             |                          |                       |
| Code                                                                                 | Compound                                                                                                                    | Reference                | Molecular Weight (Da) |
| PG_257                                                                               | Turrilliosides A                                                                                                            | (compound 102) –<br>(28) | 786.73                |
|  |                                                                                                                             |                          |                       |
| Code                                                                                 | Compound                                                                                                                    | Reference                | Molecular Weight (Da) |
| PG_258                                                                               | Turrilliosides B                                                                                                            | (compound 103) –<br>(28) | 962.901               |



|        |                       |                       |                       |
|--------|-----------------------|-----------------------|-----------------------|
|        |                       |                       |                       |
| Code   | Compound              | Reference             | Molecular Weight (Da) |
| PG_259 | Mongrhoside           | (compound 104) – (28) | 446.447               |
|        |                       |                       |                       |
| Code   | Compound              | Reference             | Molecular Weight (Da) |
| PG_260 | 3-O-Methylpoliumoside | (compound 105) – (28) | 784.758               |
|        |                       |                       |                       |
| Code   | Compound              | Reference             | Molecular Weight (Da) |

|        |                 |                          |                       |
|--------|-----------------|--------------------------|-----------------------|
| PG_261 | Ternstrosides A | (compound 106) –<br>(28) | 466.437               |
|        |                 |                          |                       |
| Code   | Compound        | Reference                | Molecular Weight (Da) |
| PG_262 | Ternstrosides B | (compound 107) –<br>(28) | 450.43                |
|        |                 |                          |                       |
| Code   | Compound        | Reference                | Molecular Weight (Da) |
| PG_263 | Ternstrosides C | (compound 108) –<br>(28) | 466.437               |
|        |                 |                          |                       |
| Code   | Compound        | Reference                | Molecular Weight (Da) |

|        |                   |                          |                       |
|--------|-------------------|--------------------------|-----------------------|
| PG_264 | Ternstrosides D   | (compound 109) –<br>(28) | 466.437               |
|        |                   |                          |                       |
| Code   | Compound          | Reference                | Molecular Weight (Da) |
| PG_265 | Ternstrosides E   | (compound 110) –<br>(28) | 450.438               |
|        |                   |                          |                       |
| Code   | Compound          | Reference                | Molecular Weight (Da) |
| PG_266 | Parviflorosides A | (compound 111) –<br>(28) | 624.59                |
|        |                   |                          |                       |
| Code   | Compound          | Reference                | Molecular Weight (Da) |
| PG_267 | Parviflorosides B | (compound 112) –<br>(28) | 462.446               |

| 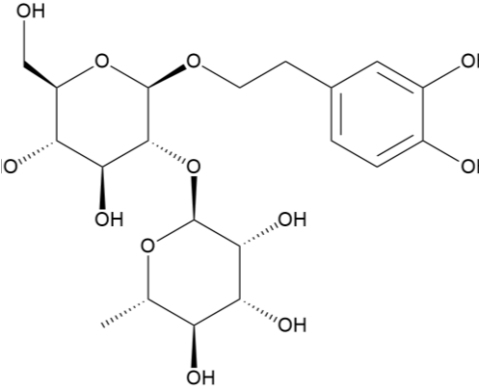   |                                                          |                       |                       |
|--------------------------------------------------------------------------------------|----------------------------------------------------------|-----------------------|-----------------------|
| Code                                                                                 | Compound                                                 | Reference             | Molecular Weight (Da) |
| PG_268                                                                               | Heterodontoside                                          | (compound 113) – (28) | 446.447               |
|   |                                                          |                       |                       |
| Code                                                                                 | Compound                                                 | Reference             | Molecular Weight (Da) |
| PG_269                                                                               | Newbouldioside C                                         | (compound 114) – (28) | 982.932               |
|  |                                                          |                       |                       |
| Code                                                                                 | Compound                                                 | Reference             | Molecular Weight (Da) |
| PG_270                                                                               | 6'-O-Coumaroyl-1'-O-[2-(3,4-dihydroxy phenyl)ethyl]-β-D- | (compound 115) –      | 462.449               |

|        | glucopyranoside                                                                                 | (28)                  |                       |
|--------|-------------------------------------------------------------------------------------------------|-----------------------|-----------------------|
|        |                                                                                                 |                       |                       |
| Code   | Compound                                                                                        | Reference             | Molecular Weight (Da) |
| PG_271 | 2-(4-Hydroxyphenyl)ethyl-O-β-D-[5-O-(4-hydroxybenzoyl)]-apiofuranosyl-(1-6)-β-D-glucopyranoside | (compound 116) – (28) | 552.527               |
|        |                                                                                                 |                       |                       |
| Code   | Compound                                                                                        | Reference             | Molecular Weight (Da) |
| PG_273 | Cuneatasides C                                                                                  | (compound 118) – (28) | 448.419               |
|        |                                                                                                 |                       |                       |
| Code   | Compound                                                                                        | Reference             | Molecular Weight (Da) |
| PG_274 | Clerodendronoside                                                                               | (compound 119) – (28) | 608.591               |

| 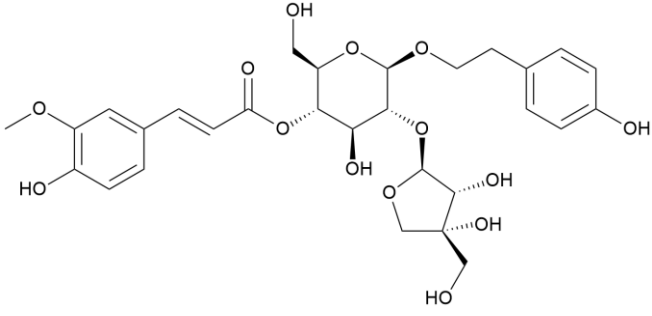   |               |                       |                       |
|--------------------------------------------------------------------------------------|---------------|-----------------------|-----------------------|
| Code                                                                                 | Compound      | Reference             | Molecular Weight (Da) |
| PG_275                                                                               | Cusianoside A | (compound 120) – (28) | 610.563               |
|    |               |                       |                       |
| Code                                                                                 | Compound      | Reference             | Molecular Weight (Da) |
| PG_276                                                                               | Cusianoside B | (compound 121) – (28) | 610.563               |
|  |               |                       |                       |
| Code                                                                                 | Compound      | Reference             | Molecular Weight (Da) |
| PG_277                                                                               | Scroside D    | (compound 122) – (28) | 478.445               |
|  |               |                       |                       |

| Code   | Compound                                                                                              | Reference             | Molecular Weight (Da) |
|--------|-------------------------------------------------------------------------------------------------------|-----------------------|-----------------------|
| PG_278 | 2-(4-Hydroxyphenyl)ethyl 1-O-β-D-[5-O-(3,4-dimethoxybenzoyl)]-apiofuranosyl-(1→6)-β-D-glucopyranoside | (compound 123) – (28) | 596.58                |
|        |                                                                                                       |                       |                       |
| Code   | Compound                                                                                              | Reference             | Molecular Weight (Da) |
| PG_279 | 2-(4-Hydroxyphenyl)ethyl 1-O-β-D-[5-O-(4-methoxybenzoyl)]-apiofuranosyl-(1→6)-β-D-glucopyranoside     | (compound 124) – (28) | 566.554               |
|        |                                                                                                       |                       |                       |
| Code   | Compound                                                                                              | Reference             | Molecular Weight (Da) |
| PG_280 | 2-(4-Hydroxyphenyl)ethyl 1-O-β-D-[5-O-(3,4,5-trimethoxybenzoyl)]-apiofuranosyl-(1→6)-β-D-             | (compound 125) – (28) | 626.606               |

| glucopyranoside                                                                      |                                                                                |                       |                       |
|--------------------------------------------------------------------------------------|--------------------------------------------------------------------------------|-----------------------|-----------------------|
| 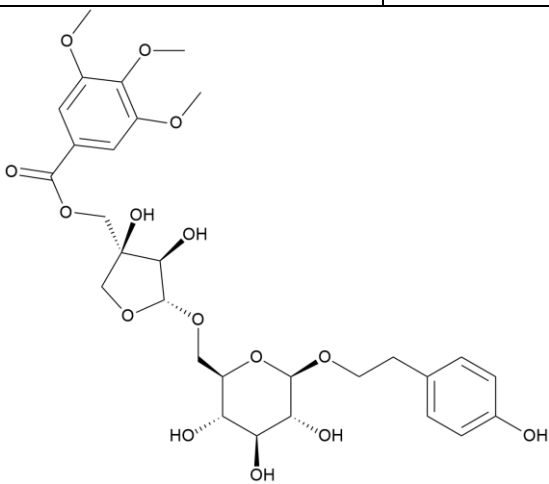   |                                                                                |                       |                       |
| Code                                                                                 | Compound                                                                       | Reference             | Molecular Weight (Da) |
| PG_281                                                                               | 1- O-3,4-Dimethoxyphenylethyl-4- O-3,4- dimethoxy cinnamoyl-β-D-glucopyranose  | (compound 126) – (28) | 666.717               |
|   |                                                                                |                       |                       |
| Code                                                                                 | Compound                                                                       | Reference             | Molecular Weight (Da) |
| PG_282                                                                               | 1- O-3, 4-Dimethoxyphenylethyl-4- O-3,4- dimethoxy cinnamoyl-β-D-glucopyranose | (compound 127) – (28) | 534.556               |
|  |                                                                                |                       |                       |
| Code                                                                                 | Compound                                                                       | Reference             | Molecular             |



|                                                                                      |                                                           |                       |                       |
|--------------------------------------------------------------------------------------|-----------------------------------------------------------|-----------------------|-----------------------|
|                                                                                      |                                                           |                       | Weight (Da)           |
| PG_283                                                                               | 2-(4-Hydroxy-3-methoxyphenyl)-ethyl-O-β-D-glucopyranoside | (compound 128) – (28) | 330.332               |
| 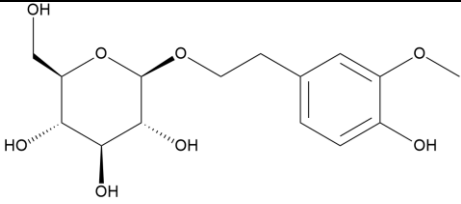   |                                                           |                       |                       |
| Code                                                                                 | Compound                                                  | Reference             | Molecular Weight (Da) |
| PG_284                                                                               | Scroside D                                                | (compound 129) – (28) | 654.616               |
|   |                                                           |                       |                       |
| Code                                                                                 | Compound                                                  | Reference             | Molecular Weight (Da) |
| PG_285                                                                               | Scroside E                                                | (compound 130) – (28) | 654.616               |
|  |                                                           |                       |                       |
| Code                                                                                 | Compound                                                  | Reference             | Molecular Weight (Da) |

| PG_286                                                                               | 1'- O-β-D-(3,4-Dihydroxyphenyl)-ethyl-6'- O-vanilloyl-glucopyranoside               | (compound 131) – (28) | 466.437               |
|--------------------------------------------------------------------------------------|-------------------------------------------------------------------------------------|-----------------------|-----------------------|
| 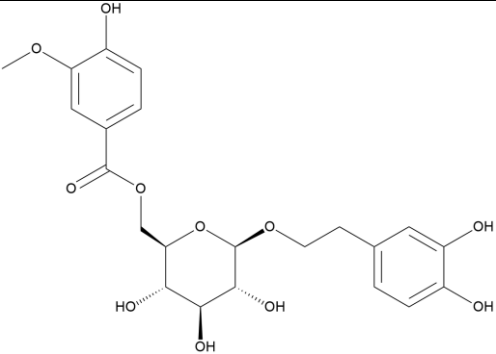   |                                                                                     |                       |                       |
| Code                                                                                 | Compound                                                                            | Reference             | Molecular Weight (Da) |
| PG_287-1                                                                             | Lancetoside (cis)                                                                   | (compound 132) – (28) | 608.591               |
|   |                                                                                     |                       |                       |
| Code                                                                                 | Compound                                                                            | Reference             | Molecular Weight (Da) |
| PG_287-2                                                                             | Lancetoside (trans)                                                                 | (compound 132) – (28) | 608.591               |
|  |                                                                                     |                       |                       |
| Code                                                                                 | Compound                                                                            | Reference             | Molecular Weight (Da) |
| PG_288                                                                               | 2-(3-Hydroxy-4-methoxyphenyl)-ethyl-O-β-D-glucopyranosyl (1->3) β-D-glucopyranoside | (compound 133) – (28) | 492.472               |

| 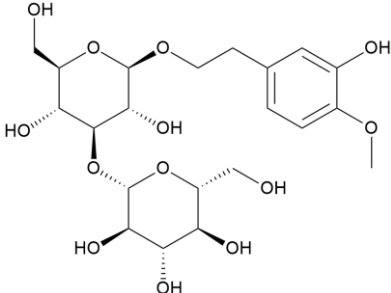   |                                                                                                       |                       |                       |
|--------------------------------------------------------------------------------------|-------------------------------------------------------------------------------------------------------|-----------------------|-----------------------|
| Code                                                                                 | Compound                                                                                              | Reference             | Molecular Weight (Da) |
| PG_289                                                                               | Hemiphroside C                                                                                        | (compound 134) – (28) | 668.643               |
|   |                                                                                                       |                       |                       |
| Code                                                                                 | Compound                                                                                              | Reference             | Molecular Weight (Da) |
| PG_290                                                                               | Aragoside                                                                                             | (compound 135) – (28) | 772.703               |
|  |                                                                                                       |                       |                       |
| Code                                                                                 | Compound                                                                                              | Reference             | Molecular Weight (Da) |
| PG_291                                                                               | 3,4-Dihydroxyphenylethanol-[8-O- $\beta$ -D-apiofuranosyl(1 $\square$ 2)]- $\beta$ -D-glucopyranoside | (compound 136) – (28) | 448.419               |

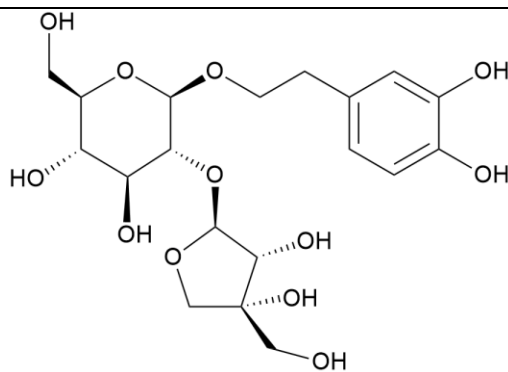

| Code   | Compound                                                                                     | Reference             | Molecular Weight (Da) |
|--------|----------------------------------------------------------------------------------------------|-----------------------|-----------------------|
| PG_292 | 3,4-Dihydroxyphenylethanol-8-O-[(5-O-vanilloyl)-β-D-apiofuranosyl (1→2)]-β-D-glucopyranoside | (compound 137) – (28) | 598.552               |

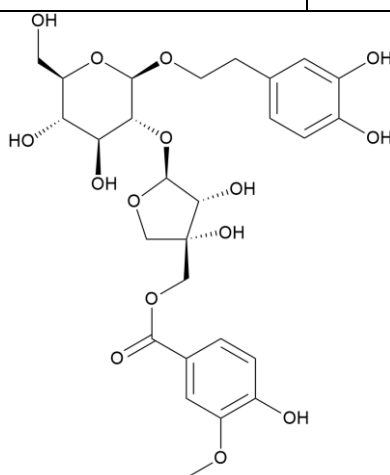

| Code   | Compound                                                                     | Reference             | Molecular Weight (Da) |
|--------|------------------------------------------------------------------------------|-----------------------|-----------------------|
| PG_293 | 3,4-Dihydroxyphenylethanol-8-O-[(β-D-apiofuranosyl(1→3))-β-D-glucopyranoside | (compound 138) – (28) | 448.419               |

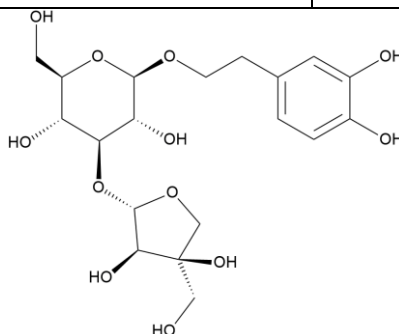

| Code | Compound | Reference | Molecular |
|------|----------|-----------|-----------|
|------|----------|-----------|-----------|

|        |                                                                                                                         |                       | Weight (Da)           |
|--------|-------------------------------------------------------------------------------------------------------------------------|-----------------------|-----------------------|
| PG_294 | 3,4-Dihydroxyphenylethanol-8-O-[4-O-transcaffeoyl-β-D-apiofuranosyl (1→3)-β-D-glucopyranosyl-(1→6)]-β-D-glucopyranoside | (compound 139) – (28) | 774.719               |
|        |                                                                                                                         |                       |                       |
| Code   | Compound                                                                                                                | Reference             | Molecular Weight (Da) |
| PG_295 | 3,4-Dihydroxyphenylethanol-8-O-[β-D-apiofuranosyl(1→3)-β-D-glucopyranosyl- (1→6)]-β-D-glucopyranoside                   | (compound 140) – (28) | 774.719               |
|        |                                                                                                                         |                       |                       |
| Code   | Compound                                                                                                                | Reference             | Molecular Weight (Da) |
| PG_296 | Bacopaside B                                                                                                            | (compound 141) – (28) | 492.475               |

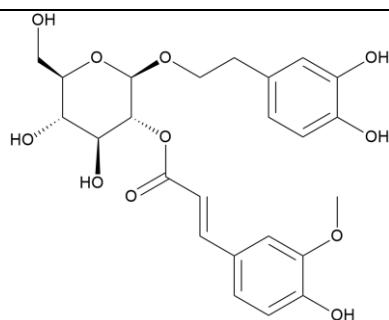

| Code   | Compound     | Reference             | Molecular Weight (Da) |
|--------|--------------|-----------------------|-----------------------|
| PG_297 | Bacopaside C | (compound 142) – (28) | 536.528               |

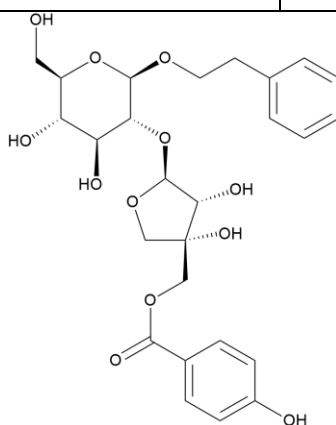

| Code   | Compound        | Reference             | Molecular Weight (Da) |
|--------|-----------------|-----------------------|-----------------------|
| PG_298 | Monnierasides I | (compound 143) – (28) | 420.413               |

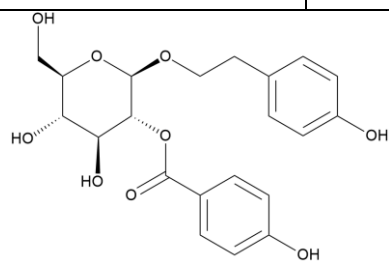

| Code   | Compound         | Reference             | Molecular Weight (Da) |
|--------|------------------|-----------------------|-----------------------|
| PG_299 | Monnierasides II | (compound 144) – (28) | 492.475               |

| 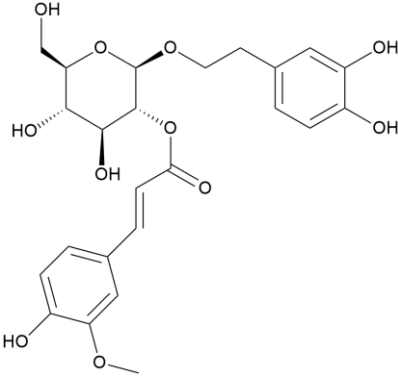   |                     |                       |                       |
|--------------------------------------------------------------------------------------|---------------------|-----------------------|-----------------------|
| Code                                                                                 | Compound            | Reference             | Molecular Weight (Da) |
| PG_300                                                                               | Monnierasides III   | (compound 145) – (28) | 436.412               |
|   |                     |                       |                       |
| Code                                                                                 | Compound            | Reference             | Molecular Weight (Da) |
| PG_301                                                                               | Persicoside         | (compound 146) – (28) | 802.729               |
|  |                     |                       |                       |
| Code                                                                                 | Compound            | Reference             | Molecular Weight (Da) |
| PG_302                                                                               | Dracunculifosides O | (compound 147) – (28) | 578.565               |

| 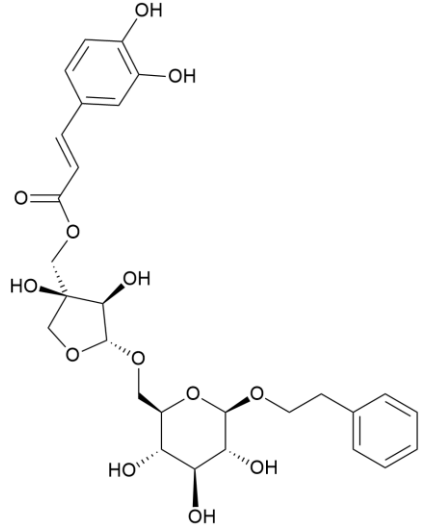   |                           |                       |                       |
|--------------------------------------------------------------------------------------|---------------------------|-----------------------|-----------------------|
| Code                                                                                 | Compound                  | Reference             | Molecular Weight (Da) |
| PG_303                                                                               | Echipuroside A            | (compound 148) – (28) | 446.447               |
|   |                           |                       |                       |
| Code                                                                                 | Compound                  | Reference             | Molecular Weight (Da) |
| PG_304                                                                               | 2'-O-Acetylplantamajoside | (compound 149) – (28) | 682.626               |
|  |                           |                       |                       |
| Code                                                                                 | Compound                  | Reference             | Molecular Weight (Da) |



|        |                                                                   |                          |                       |
|--------|-------------------------------------------------------------------|--------------------------|-----------------------|
| PG_305 | 2'- O, 6''- O-<br>Diacetylplantamajoside                          | (compound 150) –<br>(28) | 724.663               |
|        |                                                                   |                          |                       |
| Code   | Compound                                                          | Reference                | Molecular Weight (Da) |
| PG_306 | Sayaendoside                                                      | (compound 151) –<br>(28) | 416.421               |
|        |                                                                   |                          |                       |
| Code   | Compound                                                          | Reference                | Molecular Weight (Da) |
| PG_307 | Phenethyl alcohol-D-(2'-O-β-D-<br>glucopyranosyl) glucopyranoside | (compound 152) –<br>(28) | 446.447               |
|        |                                                                   |                          |                       |
| Code   | Compound                                                          | Reference                | Molecular Weight (Da) |
| PG_308 | Isolugrandoside                                                   | (compound 153) –<br>(28) | 640.589               |

| Code   | Compound                                                                                        | Reference             | Molecular Weight (Da) |
|--------|-------------------------------------------------------------------------------------------------|-----------------------|-----------------------|
| PG_309 | Phenethyl alcohol 8- O-β-D-glucopyranosyl- (1→2)- O-β-D-apiofuranosyl-(1→6)-β-D-glucopyranoside | (compound 154) – (28) | 578.562               |
|        |                                                                                                 |                       |                       |
| Code   | Compound                                                                                        | Reference             | Molecular Weight (Da) |
| PG_310 | Phenethyl alcohol 8-O-β-D-glucopyranosyl- (1→2)-β-D-glucopyranoside                             | (compound 155) – (28) | 446.447               |
|        |                                                                                                 |                       |                       |
| Code   | Compound                                                                                        | Reference             | Molecular Weight (Da) |

| PG_311                                                                                                                                                                                                                                                                                                                                                                                                                                   | Phlomisethanoside | (compound 156) – (28) | 582.553               |
|------------------------------------------------------------------------------------------------------------------------------------------------------------------------------------------------------------------------------------------------------------------------------------------------------------------------------------------------------------------------------------------------------------------------------------------|-------------------|-----------------------|-----------------------|
| 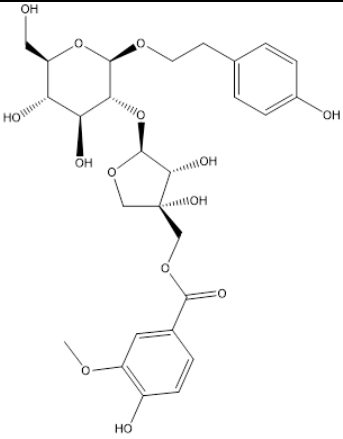 <p>The structure shows a central pyranose ring with a hydroxyl group at C4 and a hydroxymethyl group at C5. It is linked via an oxygen atom to a furanose ring. This furanose ring is further linked to a side chain containing a p-coumaroyl group (a propenoic acid derivative with a p-hydroxyphenyl ring) and a 3,4,5-trimethoxyphenyl group.</p> |                   |                       |                       |
| Code                                                                                                                                                                                                                                                                                                                                                                                                                                     | Compound          | Reference             | Molecular Weight (Da) |
| PG_312                                                                                                                                                                                                                                                                                                                                                                                                                                   | Ferruginoside A   | (compound 157) – (28) | 640.589               |
|  <p>The structure features a central pyranose ring with hydroxyl groups at C2, C3, and C6, and a hydroxymethyl group at C4. It is linked via an oxygen atom to another pyranose ring. This second pyranose ring is substituted with a p-coumaroyl group and a p-coumaroyl group (via a trans-alkene linkage).</p>                                     |                   |                       |                       |
| Code                                                                                                                                                                                                                                                                                                                                                                                                                                     | Compound          | Reference             | Molecular Weight (Da) |
| PG_313                                                                                                                                                                                                                                                                                                                                                                                                                                   | Ferruginoside B   | (compound 158) – (28) | 478.445               |

|                                                                                      |               |                       |                       |
|--------------------------------------------------------------------------------------|---------------|-----------------------|-----------------------|
| 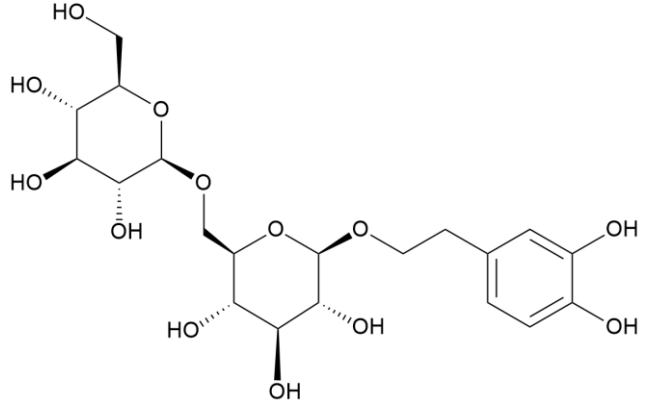   |               |                       |                       |
| Code                                                                                 | Compound      | Reference             | Molecular Weight (Da) |
| PG_314                                                                               | Fuhsioside    | (compound 159) – (28) | 452.411               |
|   |               |                       |                       |
| Code                                                                                 | Compound      | Reference             | Molecular Weight (Da) |
| PG_315                                                                               | Plantalloside | (compound 160) – (28) | 640.589               |
|  |               |                       |                       |
| Code                                                                                 | Compound      | Reference             | Molecular Weight (Da) |
| PG_316                                                                               | Lysionotoside | (compound 161) – (28) | 758.72                |

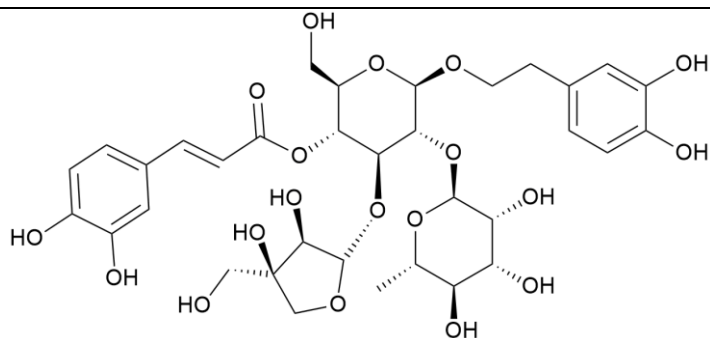

| Code   | Compound     | Reference             | Molecular Weight (Da) |
|--------|--------------|-----------------------|-----------------------|
| PG_317 | Hattushoside | (compound 162) – (28) | 628.578               |

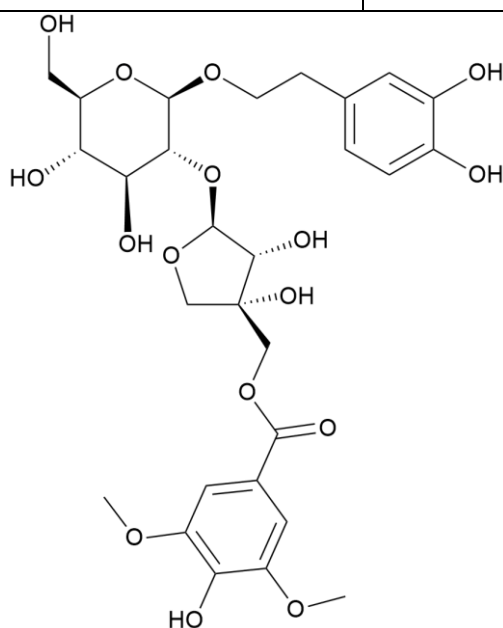

| Code   | Compound         | Reference             | Molecular Weight (Da) |
|--------|------------------|-----------------------|-----------------------|
| PG_318 | Artselaeroside A | (compound 163) – (28) | 416.421               |

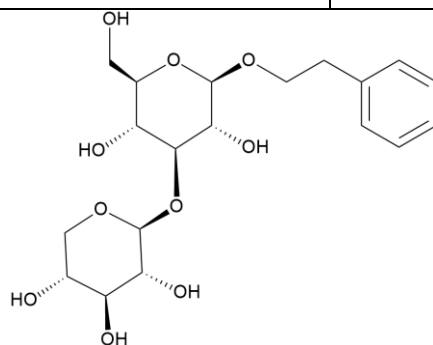

| Code | Compound | Reference | Molecular |
|------|----------|-----------|-----------|
|------|----------|-----------|-----------|

|                                                                                      |                  |                       | Weight (Da)           |
|--------------------------------------------------------------------------------------|------------------|-----------------------|-----------------------|
| PG_319                                                                               | Artselaeroside B | (compound 164) – (28) | 814.784               |
| 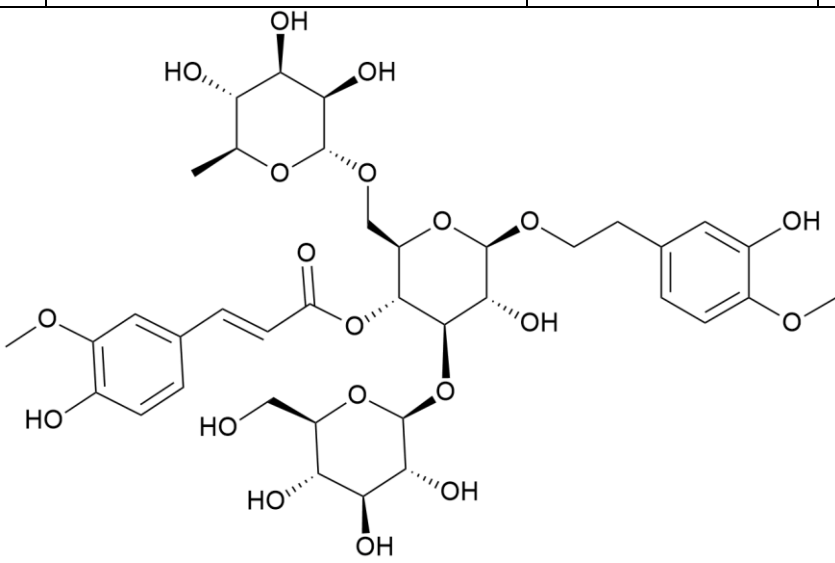   |                  |                       |                       |
| Code                                                                                 | Compound         | Reference             | Molecular Weight (Da) |
| PG_320                                                                               | Scroside A       | (compound 165) – (28) | 830.783               |
|  |                  |                       |                       |
| Code                                                                                 | Compound         | Reference             | Molecular Weight (Da) |
| PG_321                                                                               | Scroside B       | (compound 166) – (28) | 668.643               |

| 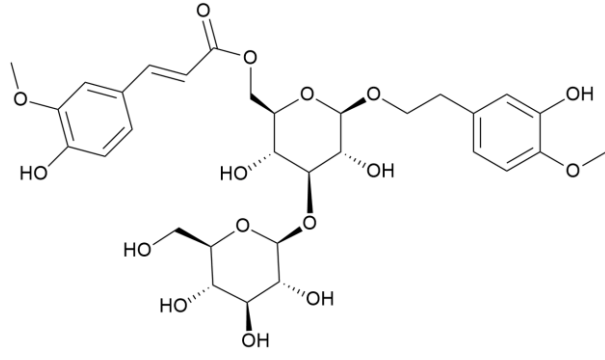   |                         |                       |                       |
|--------------------------------------------------------------------------------------|-------------------------|-----------------------|-----------------------|
| Code                                                                                 | Compound                | Reference             | Molecular Weight (Da) |
| PG_322                                                                               | Scroside C              | (compound 167) – (28) | 830.783               |
|   |                         |                       |                       |
| Code                                                                                 | Compound                | Reference             | Molecular Weight (Da) |
| PG_323-1                                                                             | Nyctoside A             | (compound 168) – (28) | 610.563               |
|  |                         |                       |                       |
| Code                                                                                 | Compound                | Reference             | Molecular Weight (Da) |
| PG_323                                                                               | Cistantubulosides C1/C2 | (compound 169) – (28) | 802.729               |

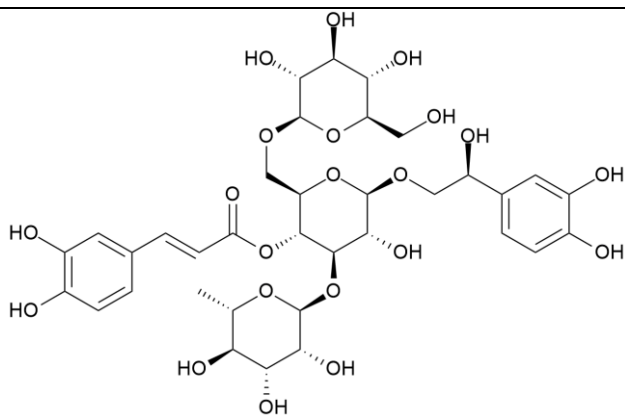

| Code   | Compound     | Reference             | Molecular Weight (Da) |
|--------|--------------|-----------------------|-----------------------|
| PG_324 | Lamiusides D | (compound 170) – (28) | 818.772               |

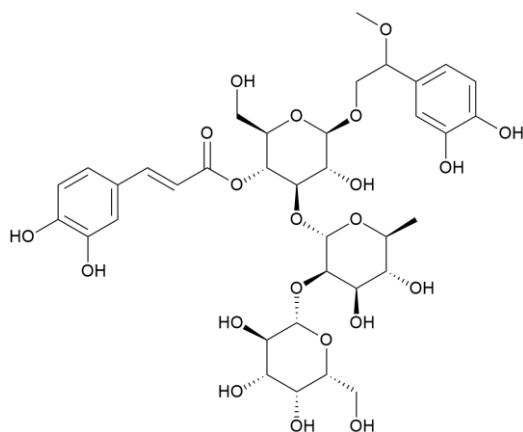

| Code   | Compound      | Reference             | Molecular Weight (Da) |
|--------|---------------|-----------------------|-----------------------|
| PG_325 | Rossicaside F | (compound 171) – (28) | 830.783               |

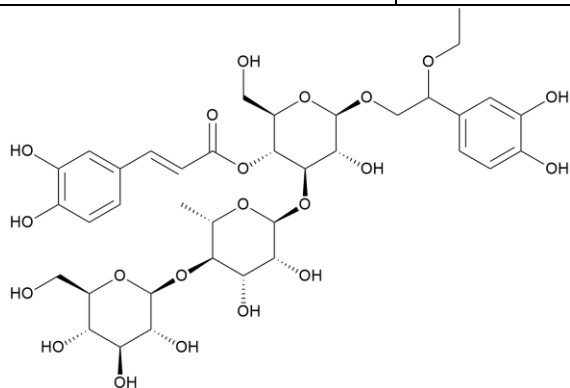

| Code | Compound | Reference | Molecular |
|------|----------|-----------|-----------|
|      |          |           |           |



|        |                                                                                          |                       | Weight (Da)           |
|--------|------------------------------------------------------------------------------------------|-----------------------|-----------------------|
| PG_326 | Ilicifolioside A                                                                         | (compound 172) – (28) | 668.643               |
|        |                                                                                          |                       |                       |
| Code   | Compound                                                                                 | Reference             | Molecular Weight (Da) |
| PG_327 | 1'-(4-Hydroxyphenyl)ethane-1',2'-diol 2'-O-β-D-apiofuranosyl - (1→6)-β-D-glucopyranoside | (compound 173) – (28) | 448.419               |
|        |                                                                                          |                       |                       |
| Code   | Compound                                                                                 | Reference             | Molecular Weight (Da) |
| PG_328 | Wedelosin                                                                                | (compound 174) – (28) | 772.703               |
|        |                                                                                          |                       |                       |

| Code                                                                                 | Compound                  | Reference             | Molecular Weight (Da) |
|--------------------------------------------------------------------------------------|---------------------------|-----------------------|-----------------------|
| PG_329                                                                               | Suspensaside B            | (compound 175) – (28) | 696.696               |
| 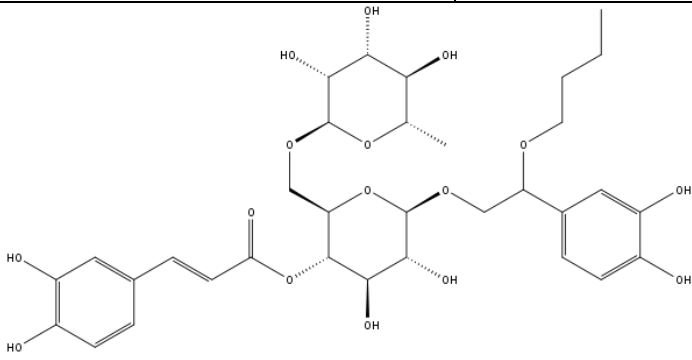   |                           |                       |                       |
| Code                                                                                 | Compound                  | Reference             | Molecular Weight (Da) |
| PG_330                                                                               | Cuneataside A             | (compound 176) – (28) | 314.289               |
|   |                           |                       |                       |
| Code                                                                                 | Compound                  | Reference             | Molecular Weight (Da) |
| PG_331                                                                               | Cuneataside B             | (compound 177) – (28) | 314.289               |
|  |                           |                       |                       |
| Code                                                                                 | Compound                  | Reference             | Molecular Weight (Da) |
| PG_332                                                                               | 3'''-O-Methyl crenatoside | (compound 178) – (28) | 636.601               |

| 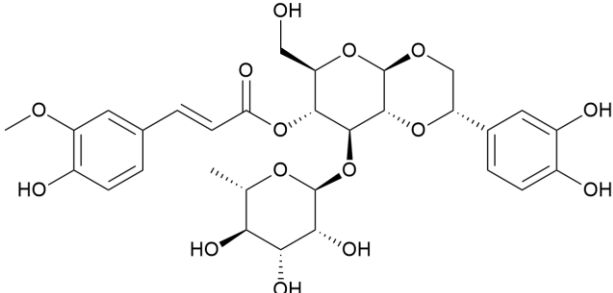   |                 |                       |                       |
|--------------------------------------------------------------------------------------|-----------------|-----------------------|-----------------------|
| Code                                                                                 | Compound        | Reference             | Molecular Weight (Da) |
| PG_333                                                                               | Suspensaside A  | (compound 179) – (28) | 622.574               |
|   |                 |                       |                       |
| Code                                                                                 | Compound        | Reference             | Molecular Weight (Da) |
| PG_334                                                                               | Isocrenatoside  | (compound 180) – (28) | 622.574               |
|  |                 |                       |                       |
| Code                                                                                 | Compound        | Reference             | Molecular Weight (Da) |
| PG_335                                                                               | Isoleoacteoside | (compound 181) –      | 1012.96               |

|                                                                                      |                | (28)                  |                       |
|--------------------------------------------------------------------------------------|----------------|-----------------------|-----------------------|
| 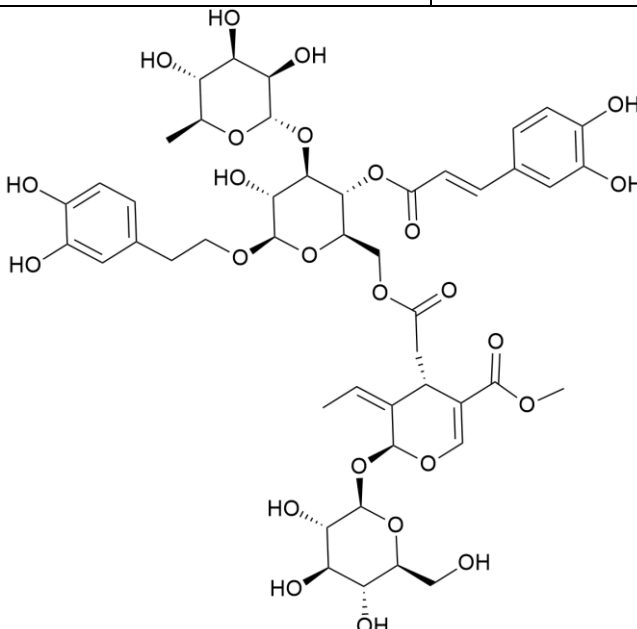   |                |                       |                       |
| Code                                                                                 | Compound       | Reference             | Molecular Weight (Da) |
| PG_336                                                                               | Safghanoside E | (compound 182) – (28) | 796.769               |
|  |                |                       |                       |
| Code                                                                                 | Compound       | Reference             | Molecular Weight (Da) |
| PG_337                                                                               | Safghanoside F | (compound 183) – (28) | 796.813               |



| 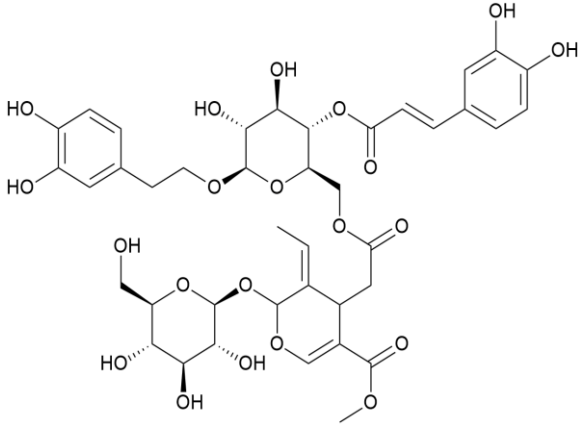   |                                   |                       |                       |
|--------------------------------------------------------------------------------------|-----------------------------------|-----------------------|-----------------------|
| Code                                                                                 | Compound                          | Reference             | Molecular Weight (Da) |
| PG_340                                                                               | Specneuzhenide                    | (compound 186) – (28) | 690.689               |
|   |                                   |                       |                       |
| Code                                                                                 | Compound                          | Reference             | Molecular Weight (Da) |
| PG_341                                                                               | 6'-O-β-D-Glucopyranosyloleuropein | (compound 187) – (28) | 690.645               |
|  |                                   |                       |                       |
| Code                                                                                 | Compound                          | Reference             | Molecular Weight (Da) |
| PG_342                                                                               | Neopolyanoside                    | (compound 188) – (28) | 1091.07               |

| Code     | Compound                                                                                                                    | Reference             | Molecular Weight (Da) |
|----------|-----------------------------------------------------------------------------------------------------------------------------|-----------------------|-----------------------|
| PG_343-1 | (1,2-Dihydroxyethyl)-2-methoxyphenyl 1-O-β-D-[5-O-(3,4-dimethoxybenzoyl)]-apiofuranosyl-(1 → 6)-β-D-glucopyranoside (trans) | (compound 189) – (28) | 642.605               |
|          |                                                                                                                             |                       |                       |
| Code     | Compound                                                                                                                    | Reference             | Molecular Weight (Da) |
| PG_343-2 | (1,2-Dihydroxyethyl)-2-methoxyphenyl 1-O-β-D-[5-O-(3,4-dimethoxybenzoyl)]-apiofuranosyl-(1 → 6)-β-D-glucopyranoside (cis)   | (compound 189) – (28) | 642.605               |
|          |                                                                                                                             |                       |                       |

| Code                                                                                 | Compound                                                                                                                          | Reference             | Molecular Weight (Da) |
|--------------------------------------------------------------------------------------|-----------------------------------------------------------------------------------------------------------------------------------|-----------------------|-----------------------|
| PG_344                                                                               | 3,4-Dihydroxyphenethoxy-O- $\beta$ -L-rhamnopyranosyl-(1 $\rightarrow$ 3)- $\beta$ -D-(2-O-acetyl-4-O-caffeoyl)-galactopyranoside | (compound 190) – (28) | 682.669               |
| 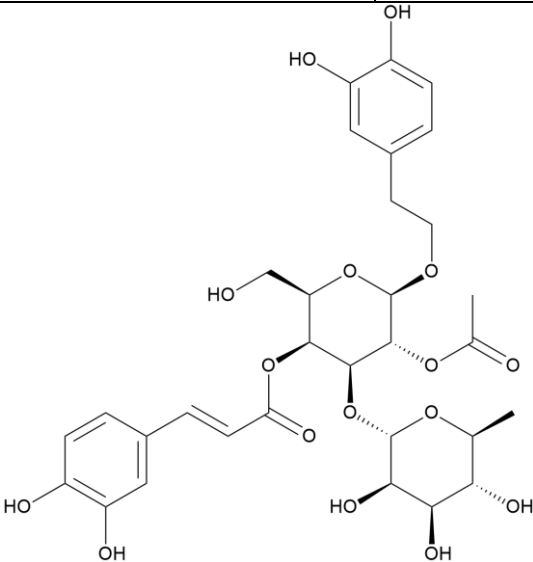  |                                                                                                                                   |                       |                       |
| Code                                                                                 | Compound                                                                                                                          | Reference             | Molecular Weight (Da) |
| PG_345                                                                               | Acanmontanoside                                                                                                                   | (compound 1) – (31)   | 804.748               |
|  |                                                                                                                                   |                       |                       |
| Code                                                                                 | Compound                                                                                                                          | Reference             | Molecular Weight (Da) |
| PG_346                                                                               | Kansanoside A                                                                                                                     | (compound 2) – (31)   | 578.562               |



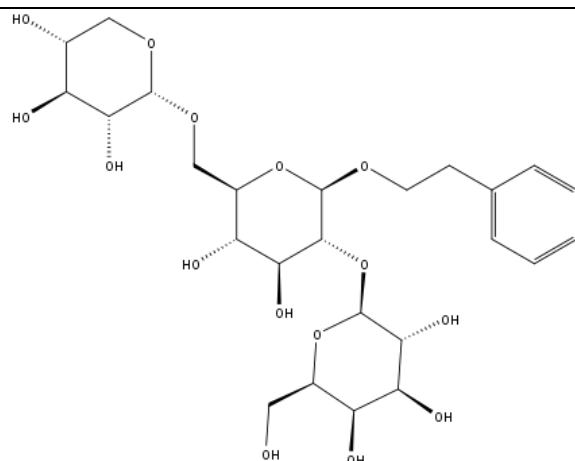

| Code   | Compound    | Reference           | Molecular Weight (Da) |
|--------|-------------|---------------------|-----------------------|
| PG_347 | Bacomside A | (compound 3) – (31) | 450.395               |

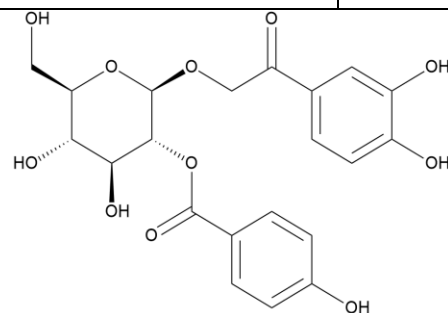

| Code   | Compound        | Reference           | Molecular Weight (Da) |
|--------|-----------------|---------------------|-----------------------|
| PG_348 | Bacomside B1/B2 | (compound 4) – (31) | 508.474               |

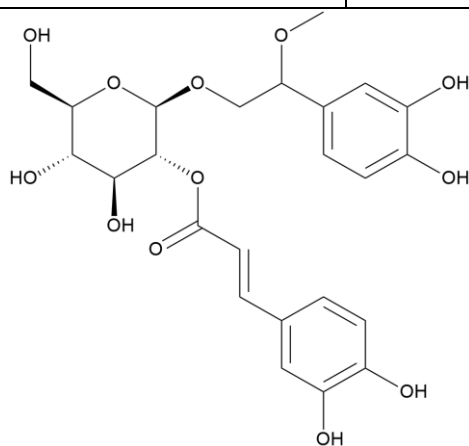

| Code   | Compound     | Reference      | Molecular Weight (Da) |
|--------|--------------|----------------|-----------------------|
| PG_349 | Himaloside A | (compound 5) – | 844.81                |

|        |                | (31)                |                       |
|--------|----------------|---------------------|-----------------------|
|        |                |                     |                       |
| Code   | Compound       | Reference           | Molecular Weight (Da) |
| PG_350 | Himaloside B   | (compound 6) – (31) | 478.448               |
|        |                |                     |                       |
| Code   | Compound       | Reference           | Molecular Weight (Da) |
| PG_351 | Z-Tubuloside D | (compound 7) – (31) | 938.879               |

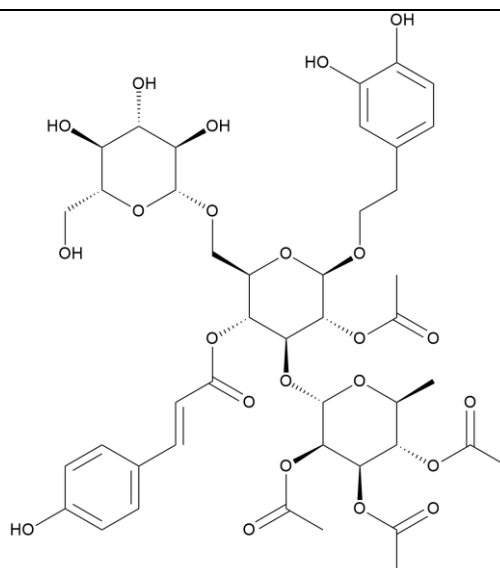

| Code   | Compound      | Reference           | Molecular Weight (Da) |
|--------|---------------|---------------------|-----------------------|
| PG_352 | Cistanoside J | (compound 8) – (31) | 694.68                |

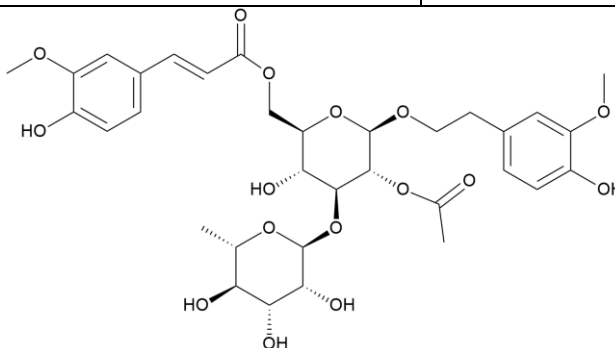

| Code   | Compound      | Reference           | Molecular Weight (Da) |
|--------|---------------|---------------------|-----------------------|
| PG_353 | Cistanoside K | (compound 9) – (31) | 680.654               |

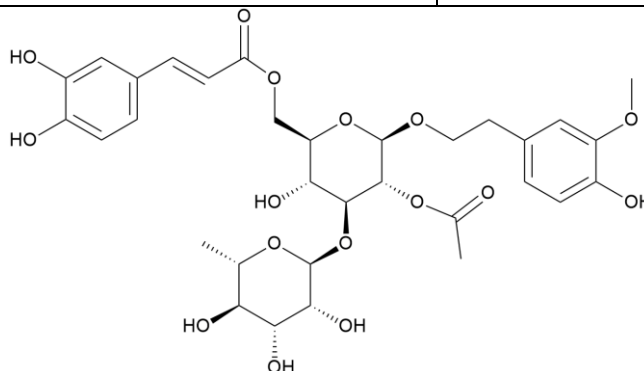

| Code | Compound | Reference | Molecular |
|------|----------|-----------|-----------|
|      |          |           |           |

|                                                                                      |               |                      | Weight (Da)           |
|--------------------------------------------------------------------------------------|---------------|----------------------|-----------------------|
| PG_354                                                                               | Cistanoside L | (compound 10) – (31) | 666.67                |
| 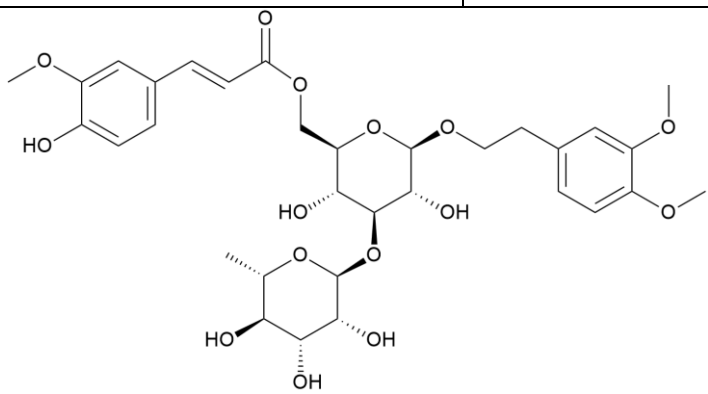   |               |                      |                       |
| Code                                                                                 | Compound      | Reference            | Molecular Weight (Da) |
| PG_355                                                                               | Cistanoside M | (compound 11) – (31) | 622.618               |
|   |               |                      |                       |
| Code                                                                                 | Compound      | Reference            | Molecular Weight (Da) |
| PG_356                                                                               | Cistanoside N | (compound 12) – (31) | 842.794               |
|  |               |                      |                       |

| Code                                                                                                                                                                                                                                                                                                                                                                                      | Compound                | Reference            | Molecular Weight (Da) |
|-------------------------------------------------------------------------------------------------------------------------------------------------------------------------------------------------------------------------------------------------------------------------------------------------------------------------------------------------------------------------------------------|-------------------------|----------------------|-----------------------|
| PG_357                                                                                                                                                                                                                                                                                                                                                                                    | Kankanoside J1/J2       | (compound 13) – (31) | 696.653               |
| 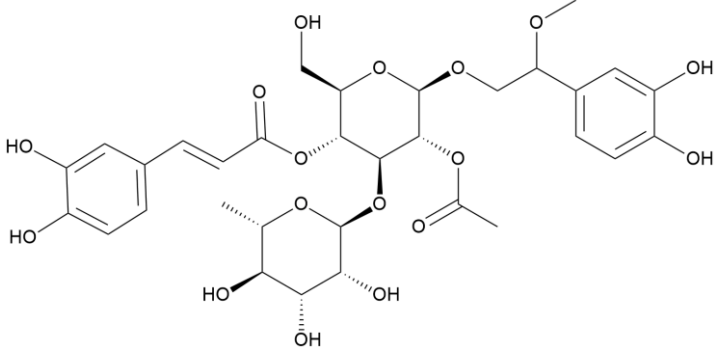 <p>The structure shows a central glucose unit linked to a galactose unit at C1. The galactose unit is substituted at C2 with a p-coumaroyl group and at C3 with an acetyl group. The glucose unit is substituted at C4 with a 3,4,5-trihydroxybenzyl group.</p>                                        |                         |                      |                       |
| Code                                                                                                                                                                                                                                                                                                                                                                                      | Compound                | Reference            | Molecular Weight (Da) |
| PG_358                                                                                                                                                                                                                                                                                                                                                                                    | Kankanoside K1/K2       | (compound 14) – (31) | 816.756               |
|  <p>The structure shows a central glucose unit linked to a galactose unit at C1. The galactose unit is substituted at C2 with a p-coumaroyl group and at C3 with an acetyl group. The glucose unit is substituted at C4 with a 3,4,5-trihydroxybenzyl group and at C6 with a hydroxymethyl group.</p>  |                         |                      |                       |
| Code                                                                                                                                                                                                                                                                                                                                                                                      | Compound                | Reference            | Molecular Weight (Da) |
| PG_359-1                                                                                                                                                                                                                                                                                                                                                                                  | Kankanoside H1/H2 (cis) | (compound 15) – (31) | 812.768               |
|  <p>The structure shows a central glucose unit linked to a galactose unit at C1. The galactose unit is substituted at C2 with a p-coumaroyl group and at C3 with an acetyl group. The glucose unit is substituted at C4 with a 3,4,5-trihydroxybenzyl group and at C6 with a hydroxymethyl group.</p> |                         |                      |                       |

| Code     | Compound                  | Reference            | Molecular Weight (Da) |
|----------|---------------------------|----------------------|-----------------------|
| PG_359-2 | Kankanoside H1/H2 (trans) | (compound 15) – (31) | 814.784               |
|          |                           |                      |                       |
| Code     | Compound                  | Reference            | Molecular Weight (Da) |
| PG_360   | Kankanoside I             | (compound 16) – (31) | 754.732               |
|          |                           |                      |                       |
| Code     | Compound                  | Reference            | Molecular Weight (Da) |
| PG_361   | Cistansinenside B         | (compound 17) – (31) | 826.795               |



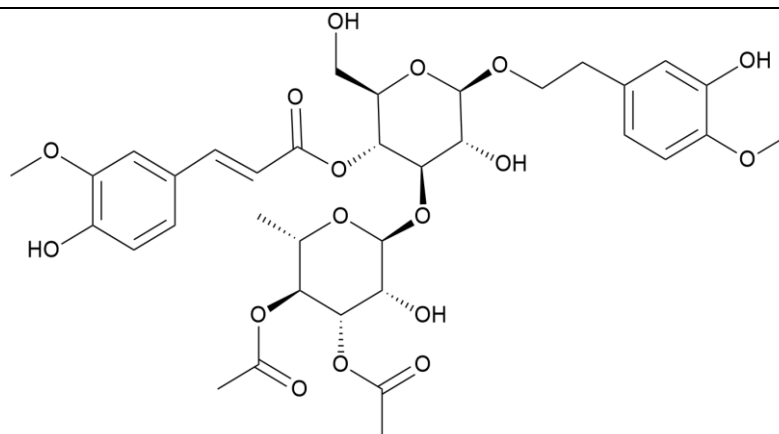

| Code   | Compound                                                                                                                                                           | Reference            | Molecular Weight (Da) |
|--------|--------------------------------------------------------------------------------------------------------------------------------------------------------------------|----------------------|-----------------------|
| PG_364 | $\beta$ -D-Glucopyranoside, 1''-O-(7S)-7-(3-methoxy-4-hydroxy-phenyl)-7-methoxyethyl-3''- $\alpha$ -L-rhamnopyranosyl-4''-[(8E)-7-(3-hydroxy-phenyl)-8-propenoate] | (compound 20) – (31) | 684.685               |

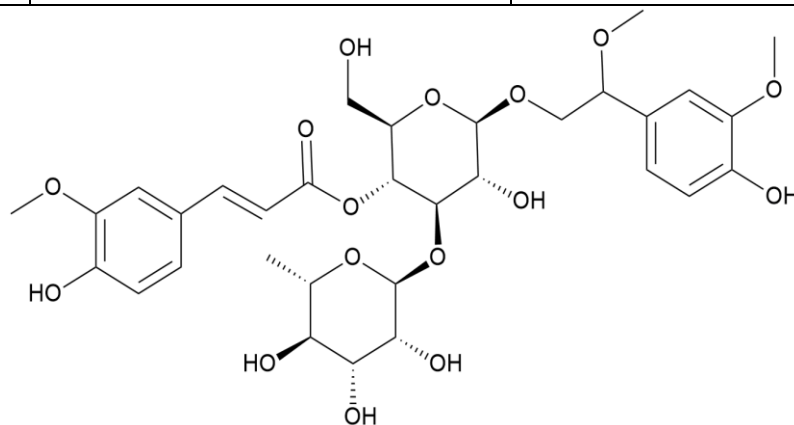

| Code   | Compound                                                                                                                                                           | Reference            | Molecular Weight (Da) |
|--------|--------------------------------------------------------------------------------------------------------------------------------------------------------------------|----------------------|-----------------------|
| PG_365 | $\beta$ -D-Glucopyranoside, 1''-O-(7S)-7-(3-methoxy-4-hydroxy-phenyl)-7-methoxyethyl-3''- $\alpha$ -L-rhamnopyranosyl-4''-[(8E)-7-(4-hydroxy-phenyl)-8-propenoate] | (compound 21) – (31) | 654.659               |



| 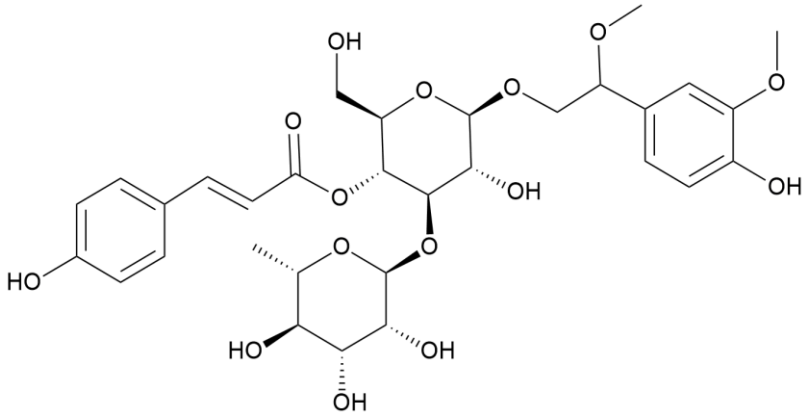   |                |                      |                       |
|--------------------------------------------------------------------------------------|----------------|----------------------|-----------------------|
| Code                                                                                 | Compound       | Reference            | Molecular Weight (Da) |
| PG_366                                                                               | Peioside B     | (compound 22) – (31) | 594.561               |
|   |                |                      |                       |
| Code                                                                                 | Compound       | Reference            | Molecular Weight (Da) |
| PG_367                                                                               | Purpureaside D | (compound 23) – (31) | 638.617               |
|  |                |                      |                       |
| Code                                                                                 | Compound       | Reference            | Molecular Weight (Da) |
| PG_368                                                                               | Purpureaside E | (compound 24) – (31) | 800.757               |

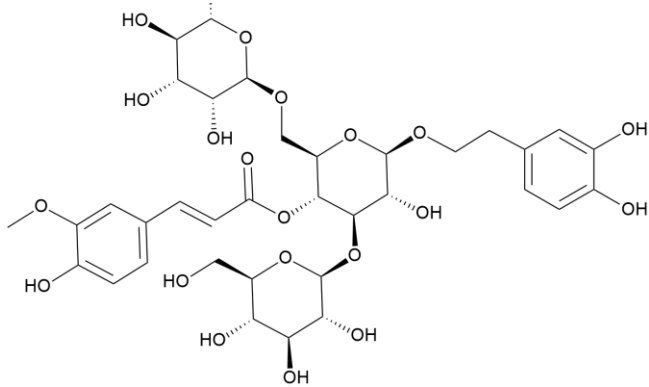

| Code   | Compound        | Reference            | Molecular Weight (Da) |
|--------|-----------------|----------------------|-----------------------|
| PG_369 | Forsythenside K | (compound 25) – (31) | 608.591               |

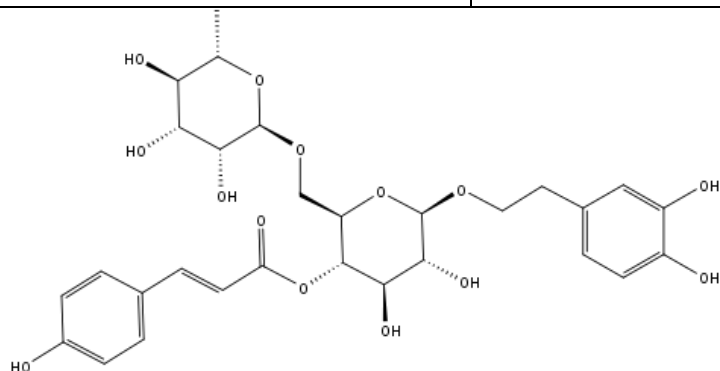

| Code   | Compound          | Reference            | Molecular Weight (Da) |
|--------|-------------------|----------------------|-----------------------|
| PG_370 | Lianqiaoxinside A | (compound 26) – (31) | 624.59                |

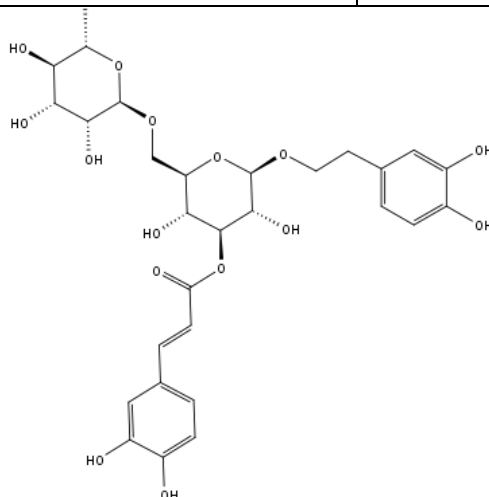

| Code                                                                                 | Compound                                                                                                                           | Reference            | Molecular Weight (Da) |
|--------------------------------------------------------------------------------------|------------------------------------------------------------------------------------------------------------------------------------|----------------------|-----------------------|
| PG_371                                                                               | 2-(3,4-Dihydroxyphenyl)-2-oxoethyl- O- $\alpha$ -L-rhamnopyranosyl- (1 $\rightarrow$ 6)-(4-O-caffeoyl)- $\beta$ -D-glucopyranoside | (compound 27) – (31) | 624.589               |
| 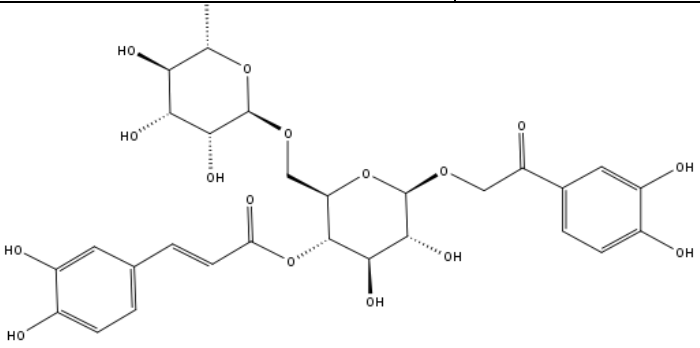   |                                                                                                                                    |                      |                       |
| Code                                                                                 | Compound                                                                                                                           | Reference            | Molecular Weight (Da) |
| PG_372                                                                               | Forsythoside A 4'-O- $\beta$ -D-glucopyranoside                                                                                    | (compound 28) – (31) | 786.73                |
|  |                                                                                                                                    |                      |                       |
| Code                                                                                 | Compound                                                                                                                           | Reference            | Molecular Weight (Da) |
| PG_373                                                                               | Isoforythoside                                                                                                                     | (compound 29) – (31) | 624.59                |

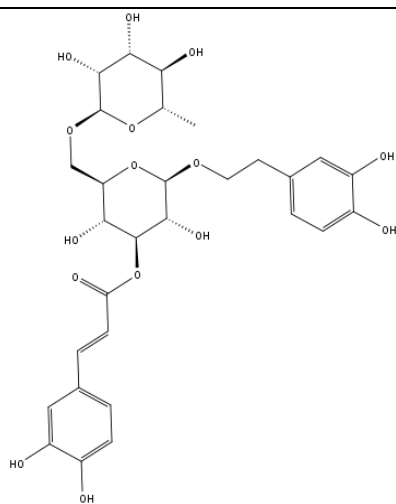

| Code   | Compound       | Reference            | Molecular Weight (Da) |
|--------|----------------|----------------------|-----------------------|
| PG_374 | Forsythoside H | (compound 30) – (31) | 624.59                |

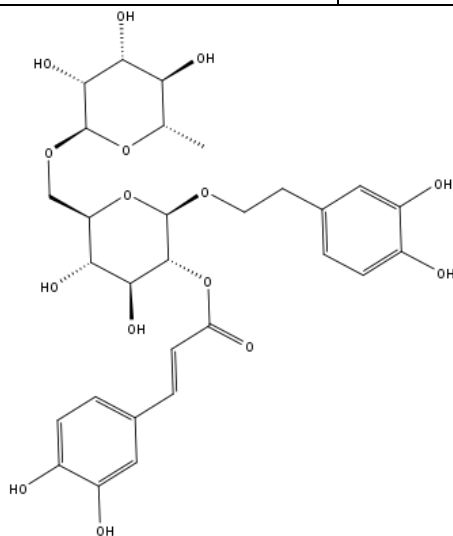

| Code   | Compound       | Reference            | Molecular Weight (Da) |
|--------|----------------|----------------------|-----------------------|
| PG_375 | Forsythoside I | (compound 31) – (31) | 624.59                |

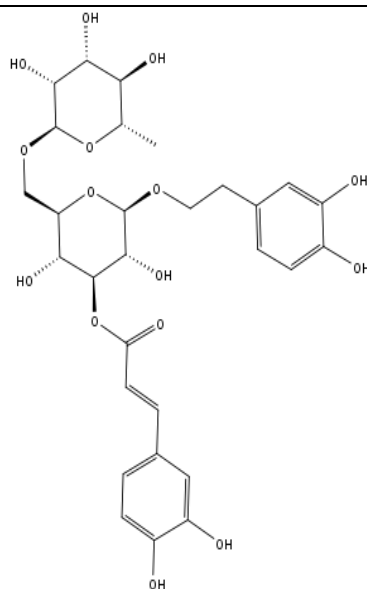

| Code   | Compound       | Reference            | Molecular Weight (Da) |
|--------|----------------|----------------------|-----------------------|
| PG_376 | Forsythoside J | (compound 32) – (31) | 610.563               |

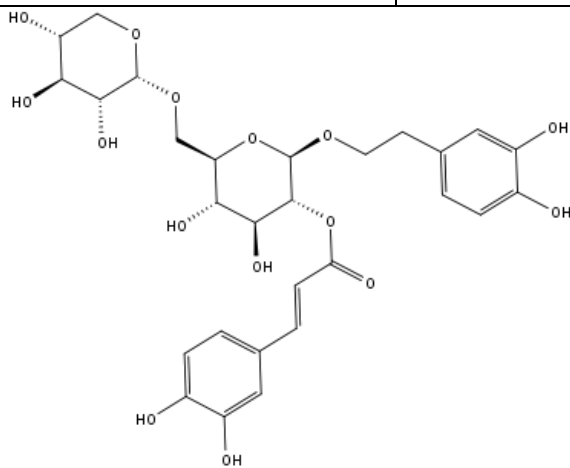

| Code   | Compound                                           | Reference            | Molecular Weight (Da) |
|--------|----------------------------------------------------|----------------------|-----------------------|
| PG_377 | Calceolarioside A 2'- $\alpha$ -L-rhamnopyranoside | (compound 33) – (31) | 624.59                |

| 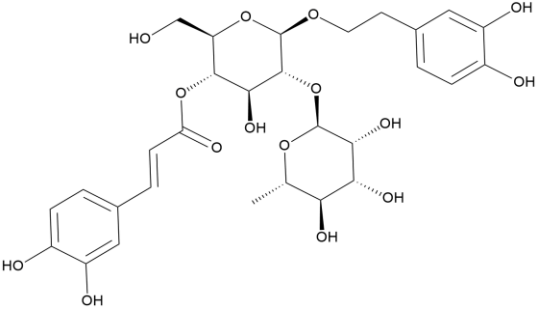   |                                                    |                      |                       |
|--------------------------------------------------------------------------------------|----------------------------------------------------|----------------------|-----------------------|
| Code                                                                                 | Compound                                           | Reference            | Molecular Weight (Da) |
| PG_378                                                                               | 3'''-O-methylcampneoside I                         | (compound 34) – (31) | 668.643               |
|   |                                                    |                      |                       |
| Code                                                                                 | Compound                                           | Reference            | Molecular Weight (Da) |
| PG_379                                                                               | 6'-O-(cis-1,4-Dihydroxycyclohexanacetyl) acteoside | (compound 35) – (31) | 780.77                |
|  |                                                    |                      |                       |
| Code                                                                                 | Compound                                           | Reference            | Molecular Weight (Da) |
| PG_380                                                                               | 6'-O-(1-Hydroxy-4-oxocyclohexanacetyl) acteoside   | (compound 36) – (31) | 778.754               |

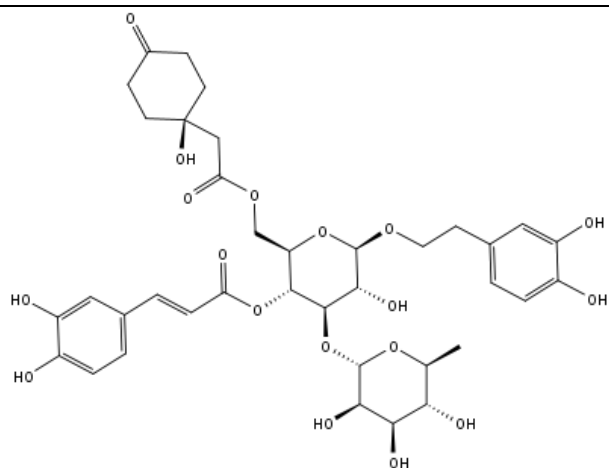

| Code   | Compound     | Reference            | Molecular Weight (Da) |
|--------|--------------|----------------------|-----------------------|
| PG_381 | Fucatoside A | (compound 37) – (31) | 610.563               |
|        |              |                      |                       |
| Code   | Compound     | Reference            | Molecular Weight (Da) |
| PG_382 | Fucatoside B | (compound 38) – (31) | 742.667               |
|        |              |                      |                       |
| Code   | Compound     | Reference            | Molecular Weight (Da) |
| PG_383 | Fucatoside C | (compound 39) – (31) | 744.693               |

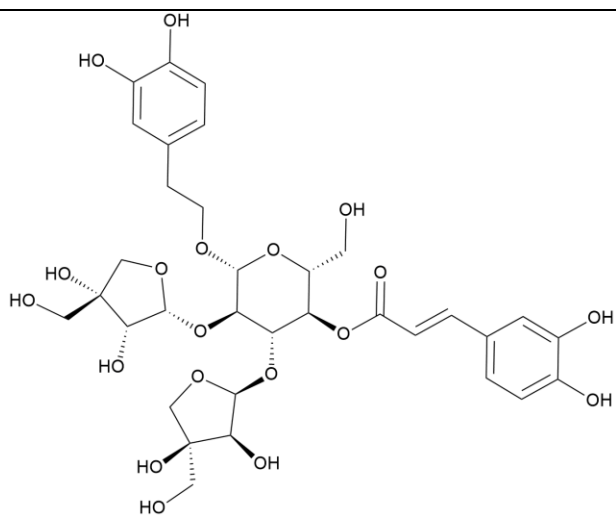

| Code   | Compound   | Reference            | Molecular Weight (Da) |
|--------|------------|----------------------|-----------------------|
| PG_384 | Raduloside | (compound 40) – (31) | 874.792               |

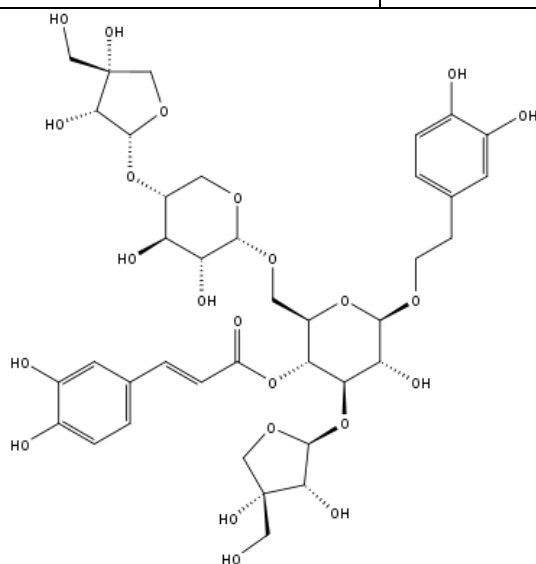

| Code   | Compound    | Reference            | Molecular Weight (Da) |
|--------|-------------|----------------------|-----------------------|
| PG_385 | Leonoside E | (compound 41) – (31) | 608.588               |



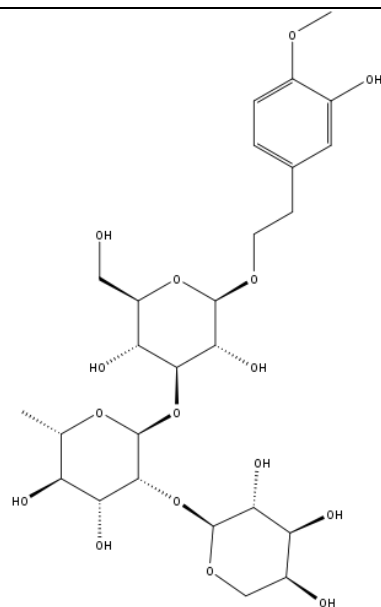

| Code   | Compound    | Reference            | Molecular Weight (Da) |
|--------|-------------|----------------------|-----------------------|
| PG_386 | Leonoside F | (compound 42) – (31) | 638.613               |

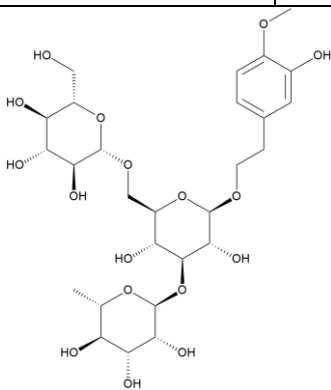

| Code   | Compound                                                                                                                      | Reference            | Molecular Weight (Da) |
|--------|-------------------------------------------------------------------------------------------------------------------------------|----------------------|-----------------------|
| PG_387 | $\beta$ -(4-Hydroxyphenyl) ethyl-4-O-E-caffeoyl-O-[ $\beta$ -D-apiofuranosyl-(1 $\rightarrow$ 2)]- $\beta$ -D-glucopyranoside | (compound 43) – (31) | 594.564               |

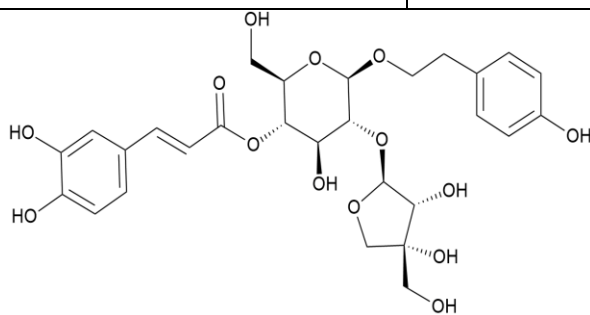

| Code                                                                                 | Compound                                                                                                                          | Reference            | Molecular Weight (Da) |
|--------------------------------------------------------------------------------------|-----------------------------------------------------------------------------------------------------------------------------------|----------------------|-----------------------|
| PG_388                                                                               | $\beta$ -(3,4-Dihydroxyphenyl) ethyl-6-O-E-caffeoyl-O-[ $\beta$ -D-apiofuranosyl-(1 $\rightarrow$ 2)]- $\beta$ -D-glucopyranoside | (compound 44) – (31) | 610.563               |
| 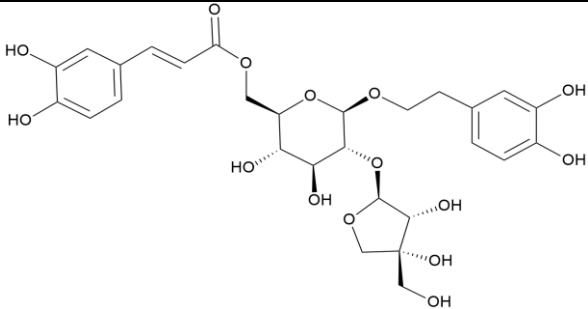   |                                                                                                                                   |                      |                       |
| Code                                                                                 | Compound                                                                                                                          | Reference            | Molecular Weight (Da) |
| PG_389                                                                               | $\beta$ -(3,4-Dihydroxyphenyl) ethyl-4-O-E-caffeoyl-O-[ $\beta$ -D-apiofuranosyl-(1 $\rightarrow$ 2)]- $\beta$ -D-glucopyranoside | (compound 45) – (31) | 610.563               |
|  |                                                                                                                                   |                      |                       |
| Code                                                                                 | Compound                                                                                                                          | Reference            | Molecular Weight (Da) |
| PG_390                                                                               | $\beta$ -(3,4-Dihydroxyphenyl) ethyl-3-O-E-caffeoyl-O-[ $\beta$ -D-apiofuranosyl-(1 $\rightarrow$ 2)]- $\beta$ -D-glucopyranoside | (compound 46) – (31) | 610.563               |

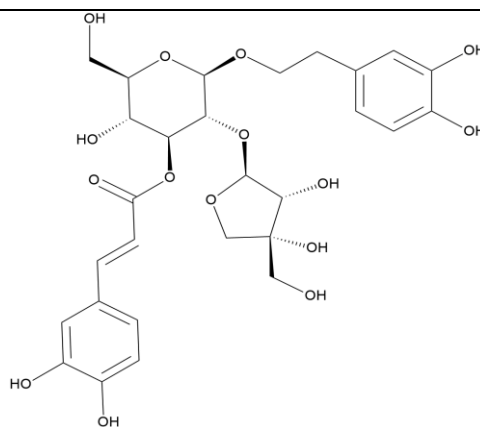

| Code   | Compound                                                                                                                      | Reference            | Molecular Weight (Da) |
|--------|-------------------------------------------------------------------------------------------------------------------------------|----------------------|-----------------------|
| PG_391 | $\beta$ -(4-Hydroxyphenyl) ethyl-3-O-E-caffeoyl-O-[ $\beta$ -D-apiofuranosyl-(1 $\rightarrow$ 2)]- $\beta$ -D-glucopyranoside | (compound 47) – (31) | 596.58                |

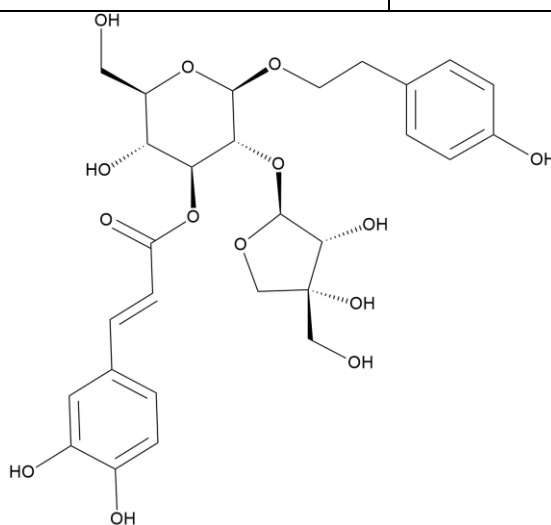

| Code   | Compound     | Reference            | Molecular Weight (Da) |
|--------|--------------|----------------------|-----------------------|
| PG_392 | Lagotiside A | (compound 48) – (31) | 624.59                |

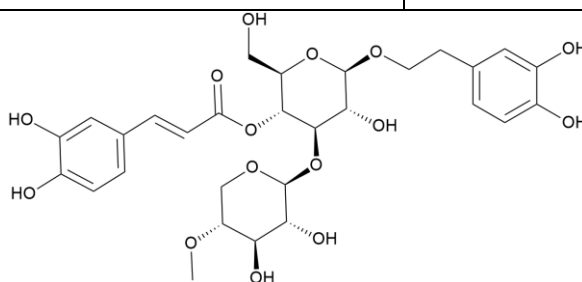

| Code | Compound | Reference | Molecular Weight (Da) |
|------|----------|-----------|-----------------------|
|      |          |           |                       |

| PG_393                                                                              | Yulanoside A          | (compound 49) – (31) | 1097.03               |
|-------------------------------------------------------------------------------------|-----------------------|----------------------|-----------------------|
| 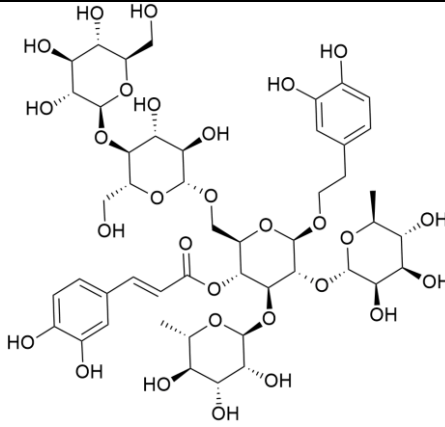  |                       |                      |                       |
| Code                                                                                | Compound              | Reference            | Molecular Weight (Da) |
| PG_394                                                                              | Yulanoside B          | (compound 50) – (31) | 948.871               |
|  |                       |                      |                       |
| Code                                                                                | Compound              | Reference            | Molecular Weight (Da) |
| PG_395                                                                              | 2'-Rhamnoechinacoside | (compound 51) – (31) | 934.888               |

| 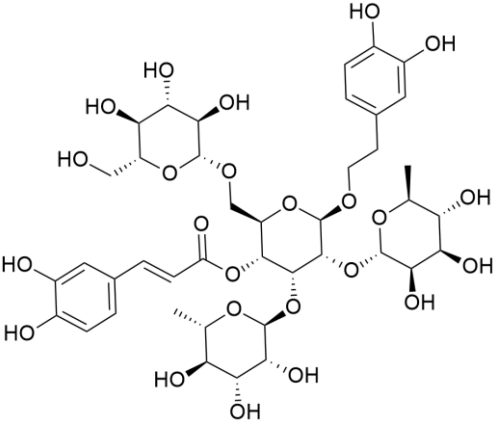   |               |                      |                       |
|--------------------------------------------------------------------------------------|---------------|----------------------|-----------------------|
| Code                                                                                 | Compound      | Reference            | Molecular Weight (Da) |
| PG_396                                                                               | Magnoloside D | (compound 52) – (31) | 624.596               |
|   |               |                      |                       |
| Code                                                                                 | Compound      | Reference            | Molecular Weight (Da) |
| PG_397                                                                               | Magnoloside E | (compound 53) – (31) | 610.563               |
|  |               |                      |                       |
| Code                                                                                 | Compound      | Reference            | Molecular Weight (Da) |
| PG_398                                                                               | Magnoloside F | (compound 54) – (31) | 786.73                |

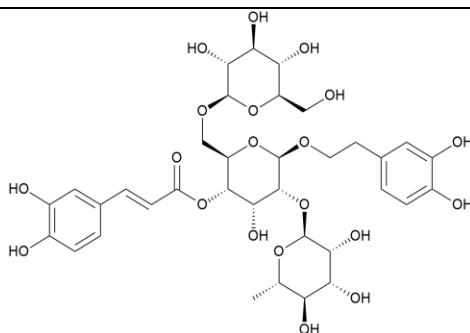

| Code   | Compound       | Reference            | Molecular Weight (Da) |
|--------|----------------|----------------------|-----------------------|
| PG_399 | Magnolioside G | (compound 55) – (31) | 772.703               |

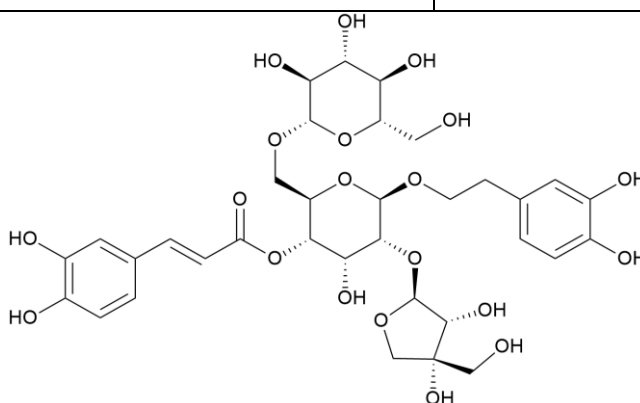

| Code   | Compound       | Reference            | Molecular Weight (Da) |
|--------|----------------|----------------------|-----------------------|
| PG_400 | Magnolioside H | (compound 56) – (31) | 774.719               |

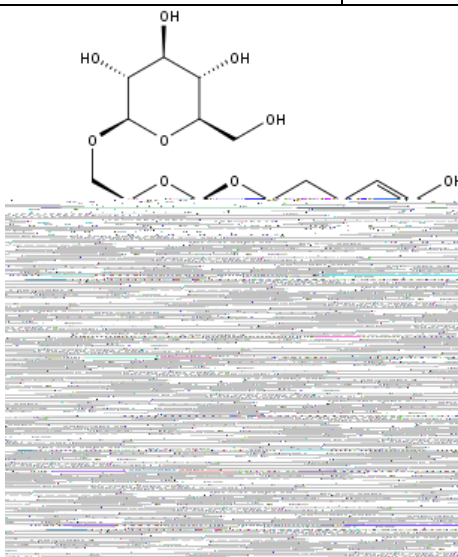

| Code                                                                                                                                                                                                                                                                                                                                                                                                                                                                                                                                                                                                                     | Compound      | Reference            | Molecular Weight (Da) |
|--------------------------------------------------------------------------------------------------------------------------------------------------------------------------------------------------------------------------------------------------------------------------------------------------------------------------------------------------------------------------------------------------------------------------------------------------------------------------------------------------------------------------------------------------------------------------------------------------------------------------|---------------|----------------------|-----------------------|
| PG_401                                                                                                                                                                                                                                                                                                                                                                                                                                                                                                                                                                                                                   | Magnoloside I | (compound 57) – (31) | 756.704               |
| 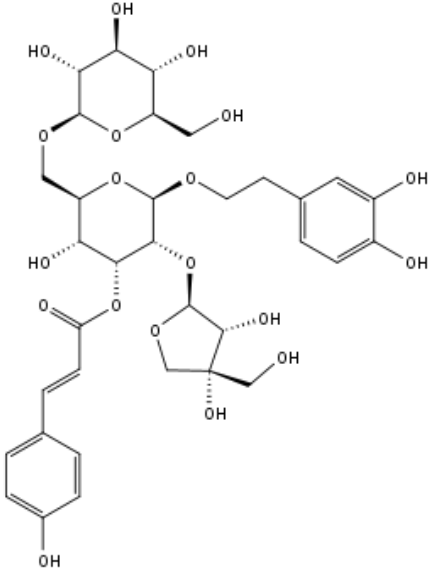 <p>The structure of Magnoloside I is a complex polyphenolic glycoside. It features a central aglycone core consisting of a 4-hydroxyphenyl ring connected via a propenoic acid chain to a furanose ring. This furanose ring is further substituted with a 2,4,6-trihydroxyphenyl ring. The aglycone is linked to a disaccharide moiety (a glucose unit linked to a galactose unit) through an ether linkage at the C-6 position of the furanose ring. The disaccharide is further substituted with a 3,4,5-trihydroxyphenyl ring.</p> |               |                      |                       |
| Code                                                                                                                                                                                                                                                                                                                                                                                                                                                                                                                                                                                                                     | Compound      | Reference            | Molecular Weight (Da) |
| PG_402                                                                                                                                                                                                                                                                                                                                                                                                                                                                                                                                                                                                                   | Magnoloside J | (compound 58) – (31) | 800.757               |
|  <p>The structure of Magnoloside J is similar to Magnoloside I but with a different aglycone core. It features a 3,4,5-trihydroxyphenyl ring connected via a propenoic acid chain to a furanose ring. This furanose ring is further substituted with a 2,4,6-trihydroxyphenyl ring. The aglycone is linked to a disaccharide moiety (a glucose unit linked to a galactose unit) through an ether linkage at the C-6 position of the furanose ring. The disaccharide is further substituted with a 3,4,5-trihydroxyphenyl ring.</p>   |               |                      |                       |
| Code                                                                                                                                                                                                                                                                                                                                                                                                                                                                                                                                                                                                                     | Compound      | Reference            | Molecular Weight (Da) |
| PG_403                                                                                                                                                                                                                                                                                                                                                                                                                                                                                                                                                                                                                   | Magnoloside K | (compound 59) – (31) | 800.757               |





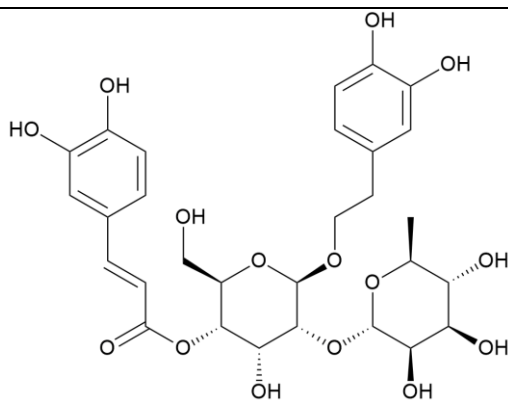

| Code   | Compound      | Reference            | Molecular Weight (Da) |
|--------|---------------|----------------------|-----------------------|
| PG_406 | Magnoloside N | (compound 62) – (31) | 948.871               |

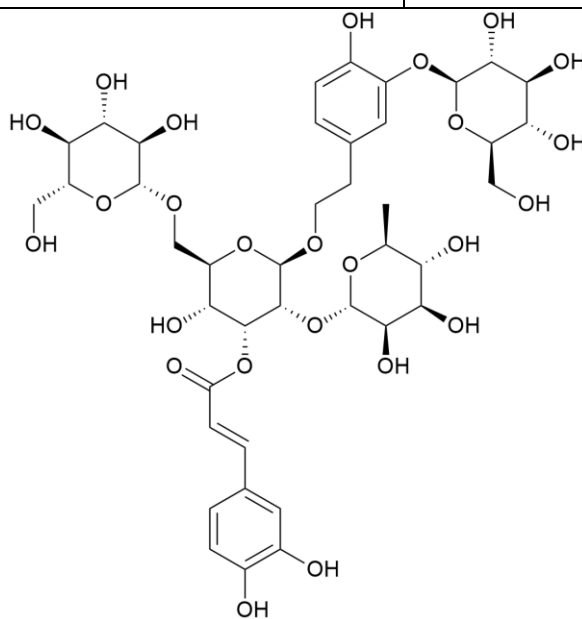

| Code   | Compound      | Reference            | Molecular Weight (Da) |
|--------|---------------|----------------------|-----------------------|
| PG_407 | Magnoloside O | (compound 63) – (31) | 804.745               |

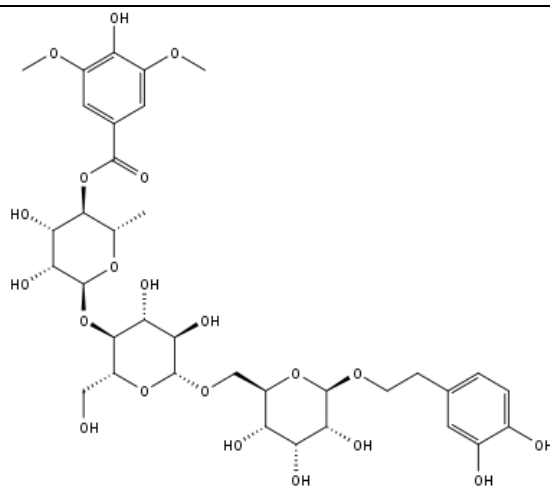

| Code   | Compound      | Reference            | Molecular Weight (Da) |
|--------|---------------|----------------------|-----------------------|
| PG_408 | Magnololide P | (compound 64) – (31) | 774.719               |

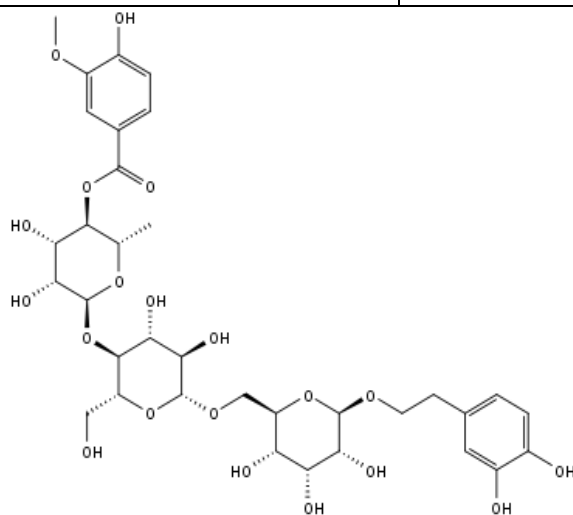

| Code   | Compound   | Reference            | Molecular Weight (Da) |
|--------|------------|----------------------|-----------------------|
| PG_409 | Savaside A | (compound 65) – (31) | 640.589               |

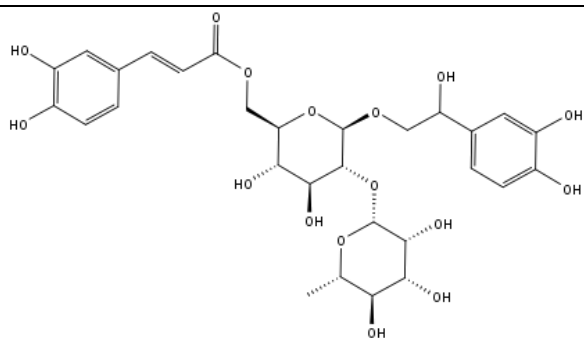

| Code   | Compound   | Reference            | Molecular Weight (Da) |
|--------|------------|----------------------|-----------------------|
| PG_410 | Savaside B | (compound 66) – (31) | 640.589               |

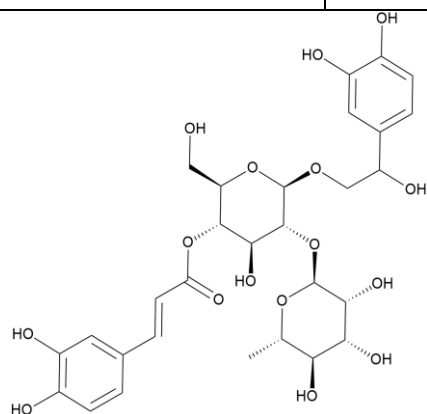

| Code   | Compound   | Reference            | Molecular Weight (Da) |
|--------|------------|----------------------|-----------------------|
| PG_411 | Savaside C | (compound 67) – (31) | 654.616               |

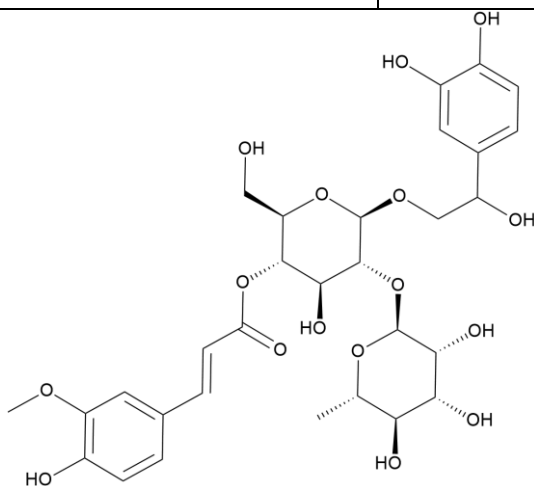

| Code | Compound | Reference | Molecular |
|------|----------|-----------|-----------|
|      |          |           |           |

|        |              |                      | Weight (Da)           |
|--------|--------------|----------------------|-----------------------|
| PG_412 | Savaside D   | (compound 68) – (31) | 624.59                |
|        |              |                      |                       |
| Code   | Compound     | Reference            | Molecular Weight (Da) |
| PG_413 | Savaside E   | (compound 69) – (31) | 656.632               |
|        |              |                      |                       |
| Code   | Compound     | Reference            | Molecular Weight (Da) |
| PG_414 | Rashomside A | (compound 71) – (31) | 772.703               |
|        |              |                      |                       |

| Code                                                                                 | Compound                                                                                                                                         | Reference                                | Molecular Weight (Da) |
|--------------------------------------------------------------------------------------|--------------------------------------------------------------------------------------------------------------------------------------------------|------------------------------------------|-----------------------|
| PG_415                                                                               | Tazettoside D (or tazettosides d)                                                                                                                | (compound 71) – (31) (compound 22) –(26) | 476.473               |
| 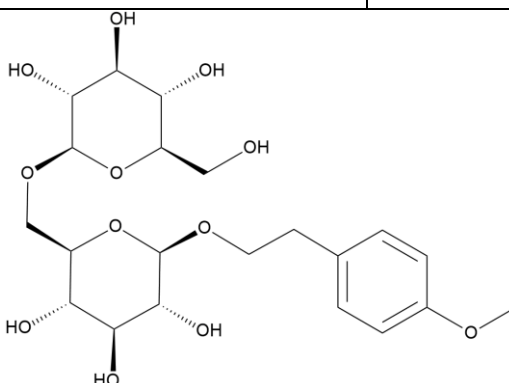   |                                                                                                                                                  |                                          |                       |
| Code                                                                                 | Compound                                                                                                                                         | Reference                                | Molecular Weight (Da) |
| PG_416                                                                               | 3-Hydroxy-4-methoxy- β-phenylethoxy-O-[2,3-di-acetyl-α-L-rhamnopyranosyl-(1→3)]-4-O-cisferuloyl-[β -D-apiofuranosyl-(1->6)]-β -D-glucopyranoside | (compound 72) – (31)                     | 868.832               |
|  |                                                                                                                                                  |                                          |                       |
| Code                                                                                 | Compound                                                                                                                                         | Reference                                | Molecular Weight (Da) |
| PG_417                                                                               | 3'''-Acetyl-O-betonyoside D                                                                                                                      | (compound 73) – (31)                     | 656.632               |

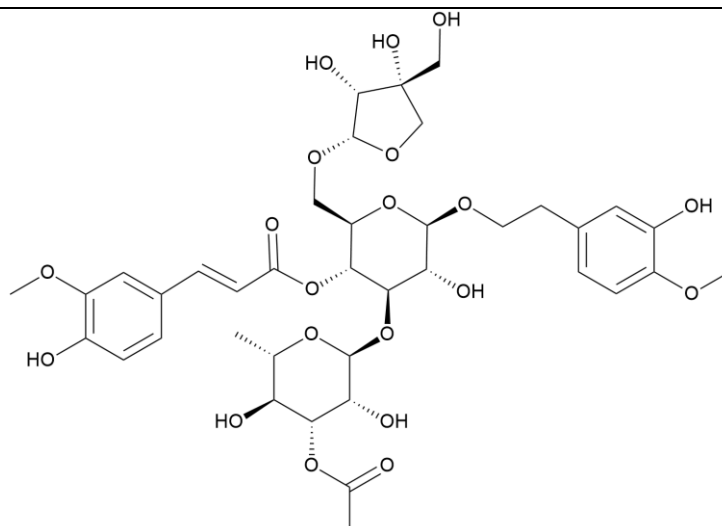

| Code   | Compound                         | Reference                                       | Molecular Weight (Da) |
|--------|----------------------------------|-------------------------------------------------|-----------------------|
| PG_418 | 2'',3''-Diacetyl-O-betonyoside D | (compound 74) –<br>(31) (compound 72)<br>– (26) | 772.703               |

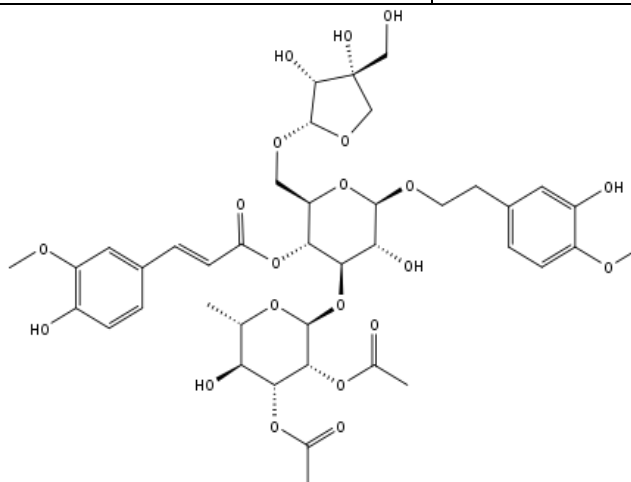

| Code   | Compound                         | Reference                                       | Molecular Weight (Da) |
|--------|----------------------------------|-------------------------------------------------|-----------------------|
| PG_419 | 3'',4''-diacetyl-O-betonyoside D | (compound 75) –<br>(31) (compound 73)<br>– (26) | 868.832               |

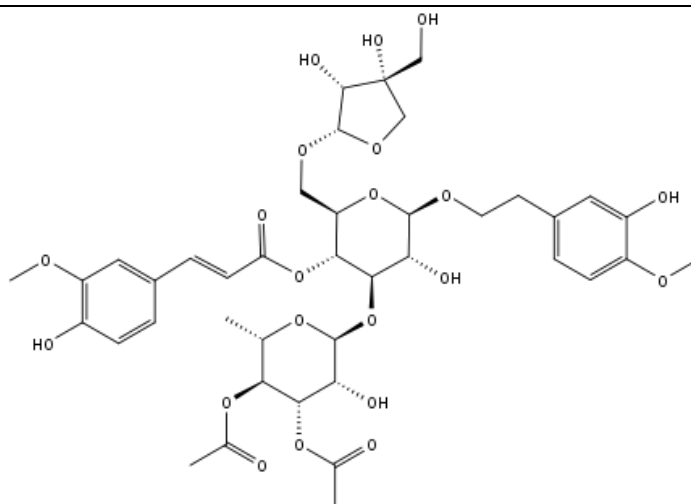

| Code   | Compound      | Reference            | Molecular Weight (Da) |
|--------|---------------|----------------------|-----------------------|
| PG_420 | Stewartiiside | (compound 76) – (31) | 904.862               |

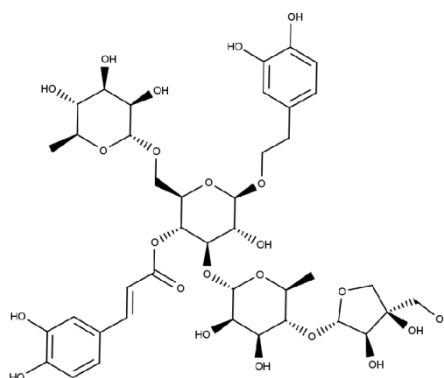

| Code   | Compound                                                                                                                 | Reference            | Molecular Weight (Da) |
|--------|--------------------------------------------------------------------------------------------------------------------------|----------------------|-----------------------|
| PG_421 | 2-(3-Hydroxy-4-methoxyphenyl) ethanol 1-O-[ $\alpha$ -L-rhamnopyranosyl-(1 $\rightarrow$ 2)- $\beta$ -D-glucopyranoside] | (compound 77) – (31) | 476.473               |

| 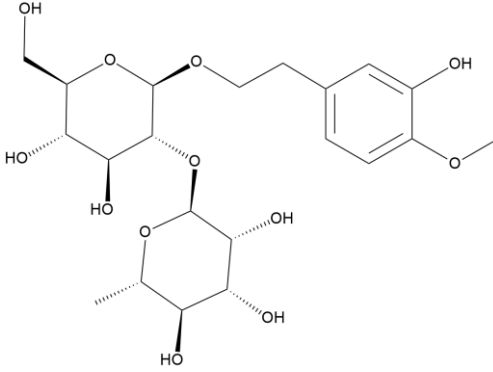   |                                                                                                       |                      |                       |
|--------------------------------------------------------------------------------------|-------------------------------------------------------------------------------------------------------|----------------------|-----------------------|
| Code                                                                                 | Compound                                                                                              | Reference            | Molecular Weight (Da) |
| PG_422                                                                               | 2-(3,4-Dihydroxyphenyl) ethyl 3-O- $\beta$ -D-allopyranosyl-6-O-caffeoyl- $\beta$ - D-glucopyranoside | (compound 78) – (31) | 640.589               |
|   |                                                                                                       |                      |                       |
| Code                                                                                 | Compound                                                                                              | Reference            | Molecular Weight (Da) |
| PG_423                                                                               | Isocassifolioside                                                                                     | (compound 79) – (31) | 770.731               |
|  |                                                                                                       |                      |                       |
| Code                                                                                 | Compound                                                                                              | Reference            | Molecular Weight (Da) |



| PG_424 | Poliumoside B                                                                                                                                                             | (compound 81) – (31) | 902.846               |
|--------|---------------------------------------------------------------------------------------------------------------------------------------------------------------------------|----------------------|-----------------------|
|        |                                                                                                                                                                           |                      |                       |
| Code   | Compound                                                                                                                                                                  | Reference            | Molecular Weight (Da) |
| PG_425 | 1-(3,4-Dihydroxyphenylethyl)-O- $\alpha$ -L-lyxopyranosyl-(1 $\rightarrow$ 2)- $\alpha$ -L-hamnopyransyl-(1 $\rightarrow$ 3)-6-Otransferuloyl- $\beta$ -D-glucopyranoside | (compound 82) – (31) | 770.731               |
|        |                                                                                                                                                                           |                      |                       |
| Code   | Compound                                                                                                                                                                  | Reference            | Molecular Weight (Da) |
| PG_426 | Chionoside A                                                                                                                                                              | (compound 83) – (31) | 786.73                |

| Code   | Compound     | Reference            | Molecular Weight (Da) |
|--------|--------------|----------------------|-----------------------|
| PG_427 | Chionoside B | (compound 84) – (31) | 800.757               |
|        |              |                      |                       |
| Code   | Compound     | Reference            | Molecular Weight (Da) |
| PG_428 | Chionoside C | (compound 85) – (31) | 948.874               |
|        |              |                      |                       |
| Code   | Compound     | Reference            | Molecular Weight (Da) |
| PG_429 | Chionoside D | (compound 86) – (31) | 936.86                |

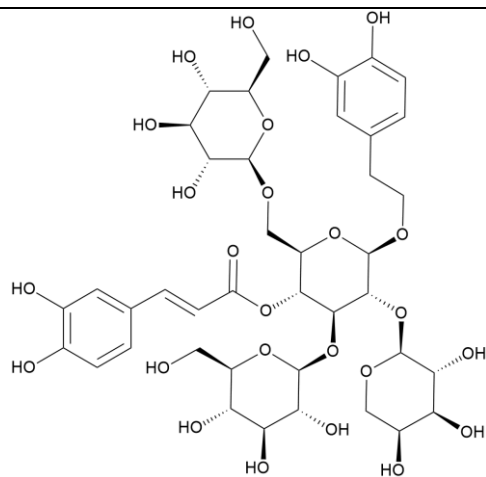

| Code   | Compound     | Reference            | Molecular Weight (Da) |
|--------|--------------|----------------------|-----------------------|
| PG_430 | Chionoside E | (compound 87) – (31) | 950.887               |

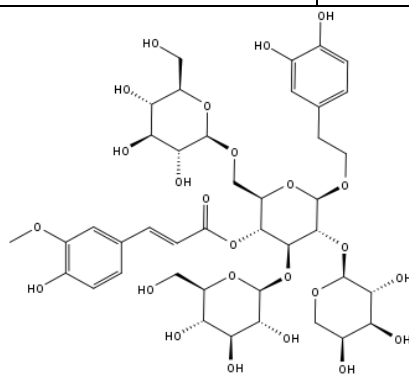

| Code   | Compound     | Reference            | Molecular Weight (Da) |
|--------|--------------|----------------------|-----------------------|
| PG_431 | Chionoside F | (compound 88) – (31) | 936.86                |

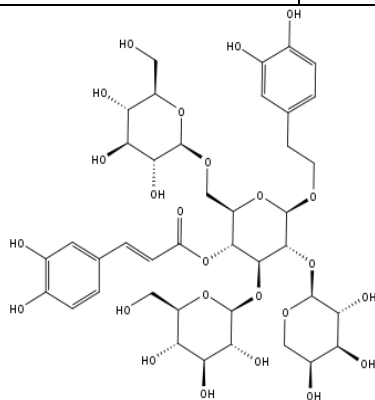

| Code | Compound | Reference | Molecular |
|------|----------|-----------|-----------|
|------|----------|-----------|-----------|

|                                                                                     |                 |                      | Weight (Da)           |
|-------------------------------------------------------------------------------------|-----------------|----------------------|-----------------------|
| PG_432                                                                              | Chionoside G    | (compound 89) – (31) | 818.772               |
| 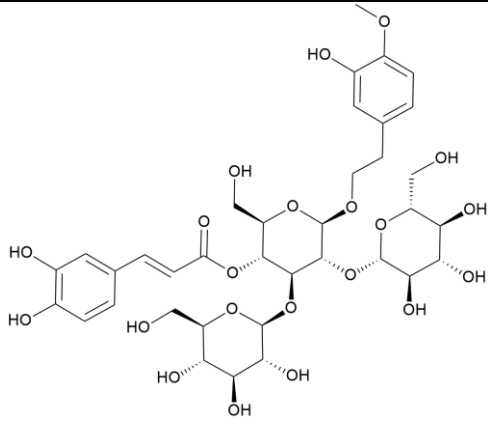  |                 |                      |                       |
| Code                                                                                | Compound        | Reference            | Molecular Weight (Da) |
| PG_433                                                                              | Chionoside I    | (compound 90) – (31) | 830.783               |
|  |                 |                      |                       |
| Code                                                                                | Compound        | Reference            | Molecular Weight (Da) |
| PG_434                                                                              | Isochionoside J | (compound 91) – (31) | 802.729               |

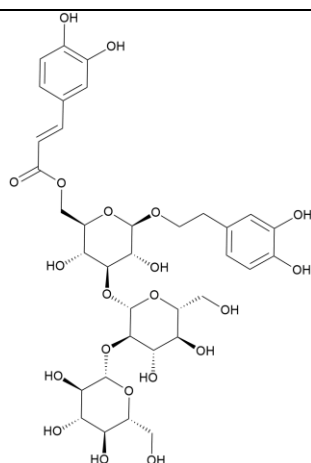

| Code   | Compound     | Reference            | Molecular Weight (Da) |
|--------|--------------|----------------------|-----------------------|
| PG_435 | Isoaragoside | (compound 92) – (31) | 774.719               |

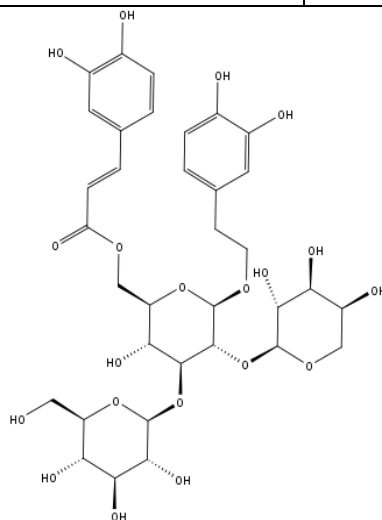

| Code   | Compound        | Reference            | Molecular Weight (Da) |
|--------|-----------------|----------------------|-----------------------|
| PG_436 | Isochionoside K | (compound 93) – (31) | 788.746               |

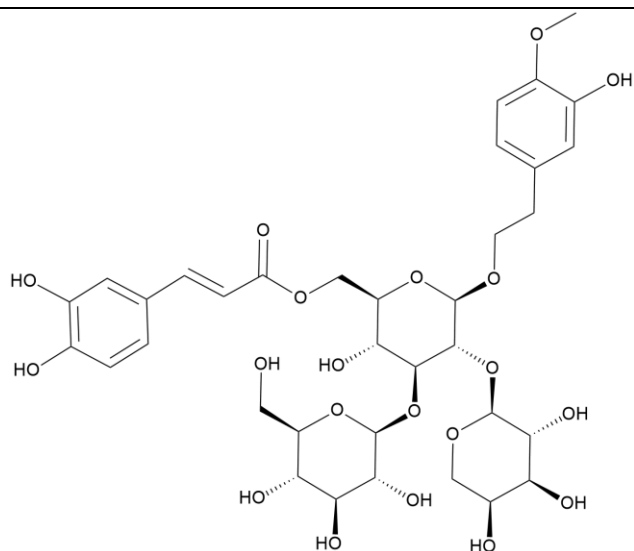

| Code   | Compound        | Reference            | Molecular Weight (Da) |
|--------|-----------------|----------------------|-----------------------|
| PG_437 | Isochionoside A | (compound 94) – (31) | 786.73                |

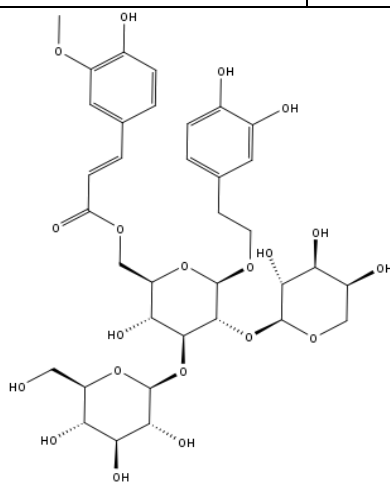

| Code   | Compound        | Reference            | Molecular Weight (Da) |
|--------|-----------------|----------------------|-----------------------|
| PG_438 | Isochionoside G | (compound 95) – (31) | 816.756               |

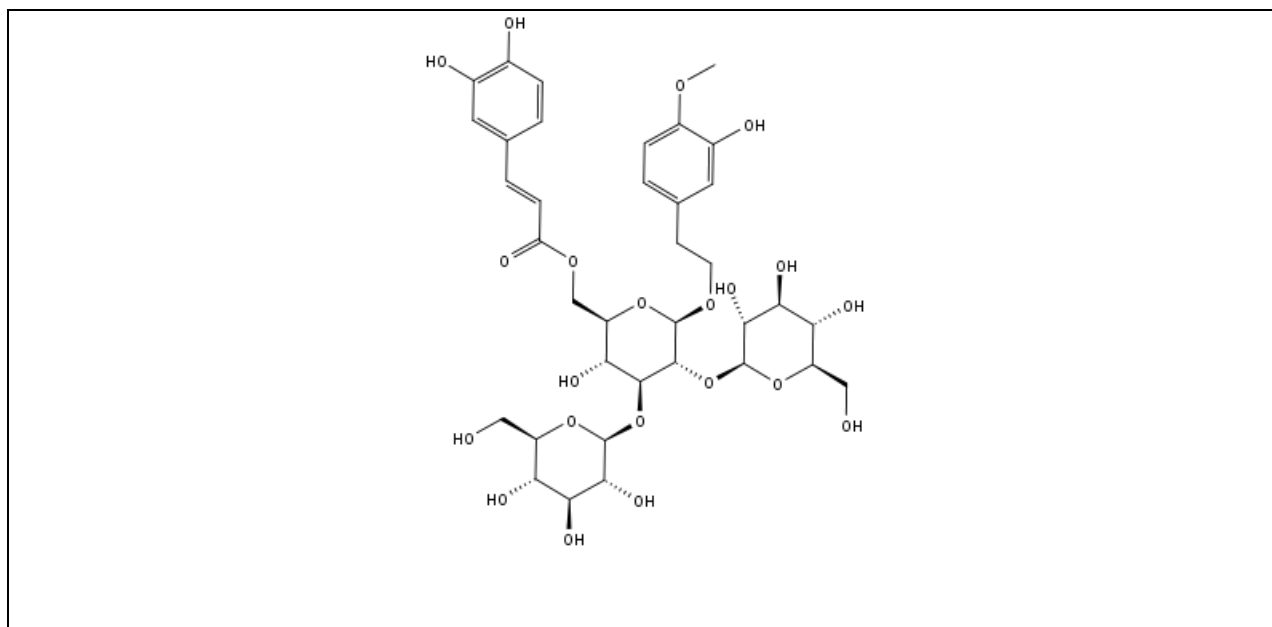

| Code   | Compound        | Reference            | Molecular Weight (Da) |
|--------|-----------------|----------------------|-----------------------|
| PG_439 | Isochionoside I | (compound 96) – (31) | 830.783               |

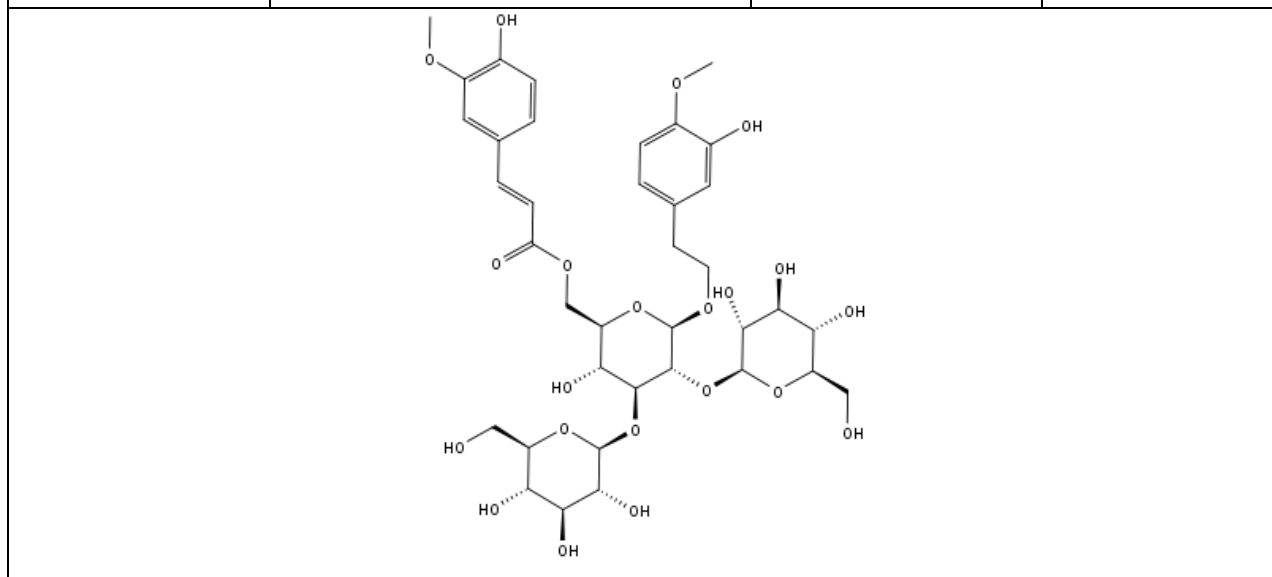

| Code   | Compound    | Reference            | Molecular Weight (Da) |
|--------|-------------|----------------------|-----------------------|
| PG_440 | Helioside A | (compound 97) – (31) | 904.818               |

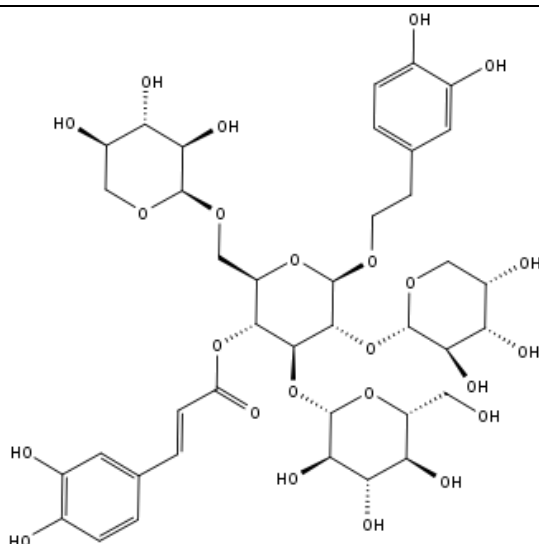

| Code   | Compound    | Reference            | Molecular Weight (Da) |
|--------|-------------|----------------------|-----------------------|
| PG_441 | Helioside B | (compound 98) – (31) | 1068.98               |

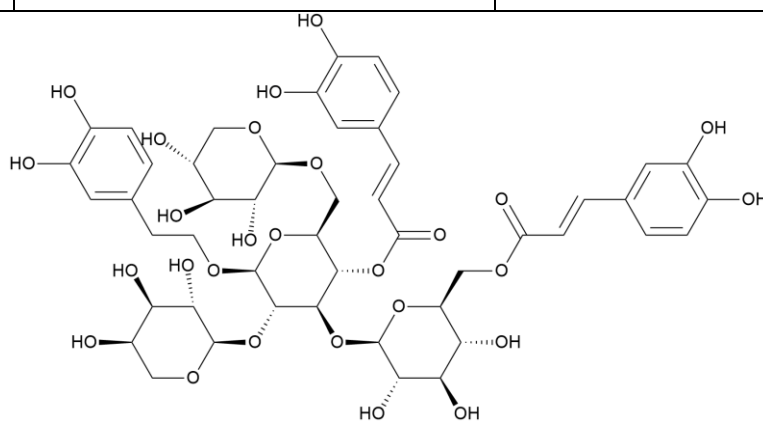

| Code   | Compound    | Reference            | Molecular Weight (Da) |
|--------|-------------|----------------------|-----------------------|
| PG_442 | Helioside C | (compound 99) – (31) | 978.845               |



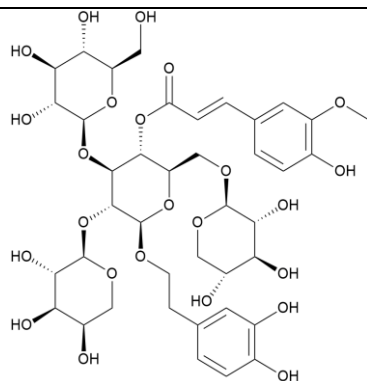

| Code   | Compound    | Reference             | Molecular Weight (Da) |
|--------|-------------|-----------------------|-----------------------|
| PG_443 | Helioside D | (compound 100) – (31) | 920.864               |

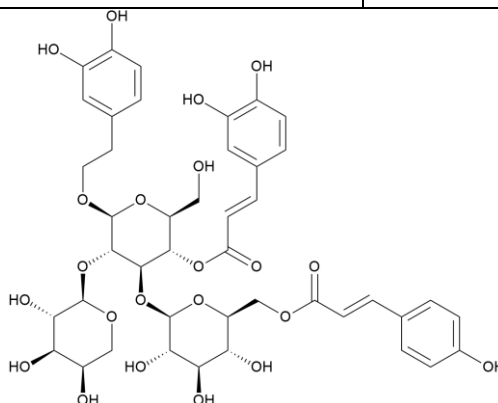

| Code   | Compound    | Reference             | Molecular Weight (Da) |
|--------|-------------|-----------------------|-----------------------|
| PG_444 | Helioside E | (compound 101) – (31) | 934.847               |

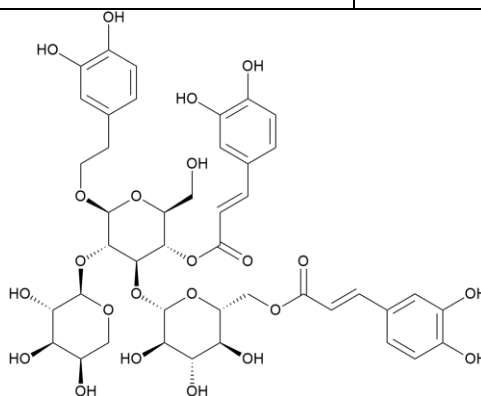

| Code   | Compound    | Reference             | Molecular Weight (Da) |
|--------|-------------|-----------------------|-----------------------|
| PG_445 | Helioside F | (compound 102) – (31) | 934.844               |

| 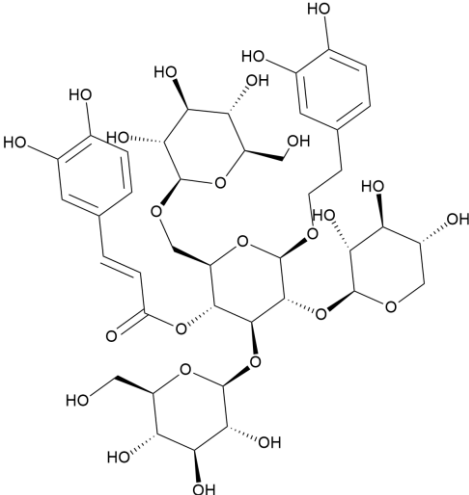   |                                                                                                       |                       |                       |
|--------------------------------------------------------------------------------------|-------------------------------------------------------------------------------------------------------|-----------------------|-----------------------|
| Code                                                                                 | Compound                                                                                              | Reference             | Molecular Weight (Da) |
| PG_446                                                                               | Lianqiaoxinoside B                                                                                    | (compound 103) – (31) | 622.574               |
|   |                                                                                                       |                       |                       |
| Code                                                                                 | Compound                                                                                              | Reference             | Molecular Weight (Da) |
| PG_447                                                                               | 1,6-bis (1-hydroxy-4-oxo-2,5-cyclohexadiene-1-acetyl)-3- (para-hydroxybenzeneacetyl)-β-glucopyraoside | (compound 105) – (31) | 614.554               |
|  |                                                                                                       |                       |                       |
| Code                                                                                 | Compound                                                                                              | Reference             | Molecular Weight (Da) |

|                                                                                      |                                   |                                            |                       |
|--------------------------------------------------------------------------------------|-----------------------------------|--------------------------------------------|-----------------------|
| PG_448                                                                               | Taraffinisoside A                 | (compound 104) – (31)                      | 446.403               |
| 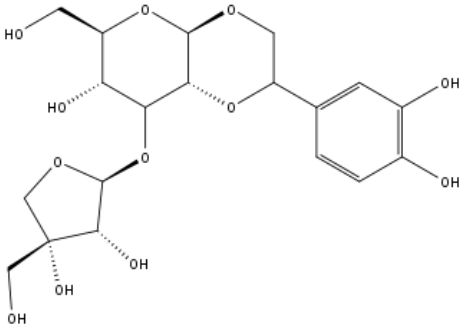   |                                   |                                            |                       |
| Code                                                                                 | Compound                          | Reference                                  | Molecular Weight (Da) |
| PG_449                                                                               | Tazettoside A (or Tazettosides A) | (compound 106) – (31)                      | 300.306               |
|   |                                   |                                            |                       |
| Code                                                                                 | Compound                          | Reference                                  | Molecular Weight (Da) |
| PG_450                                                                               | Tazettoside B (or Tazettosides B) | (compound 107) – (31) (compound 86) – (26) | 314.333               |
|  |                                   |                                            |                       |
| Code                                                                                 | Compound                          | Reference                                  | Molecular Weight (Da) |
| PG_451                                                                               | Tazettoside C (or Tazettosides C) | (compound 108) – (31) (compound 87) – (26) | 476.473               |

| 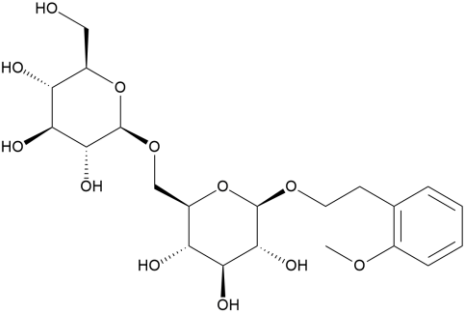   |                                                                          |                                            |                       |
|--------------------------------------------------------------------------------------|--------------------------------------------------------------------------|--------------------------------------------|-----------------------|
| Code                                                                                 | Compound                                                                 | Reference                                  | Molecular Weight (Da) |
| PG_452                                                                               | 2-(2,5-dihydroxyphenyl)-ethyl-O-(6-O-p-hydroxybenzoyl)-β-D-glucopyranose | (compound 109) – (31) (compound 88) – (26) | 436.412               |
|   |                                                                          |                                            |                       |
| Code                                                                                 | Compound                                                                 | Reference                                  | Molecular Weight (Da) |
| PG_453                                                                               | 2-(2,5-dihydroxyphenyl)-ethyl-O-(6-O-vanilloyl)-β-D-glucopyranose        | (compound 110) – (31)                      | 466.437               |
|  |                                                                          |                                            |                       |
| Code                                                                                 | Compound                                                                 | Reference                                  | Molecular Weight (Da) |
| PG_454                                                                               | Forsythoneosides A 7'R                                                   | (compound 111) – (31)                      | 1216.13               |

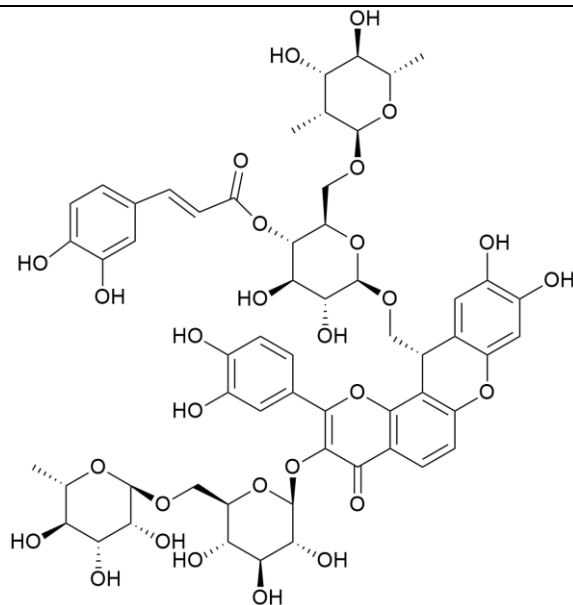

| Code   | Compound               | Reference             | Molecular Weight (Da) |
|--------|------------------------|-----------------------|-----------------------|
| PG_455 | Forsythoneosides B 7'S | (compound 112) – (31) | 1214.11               |

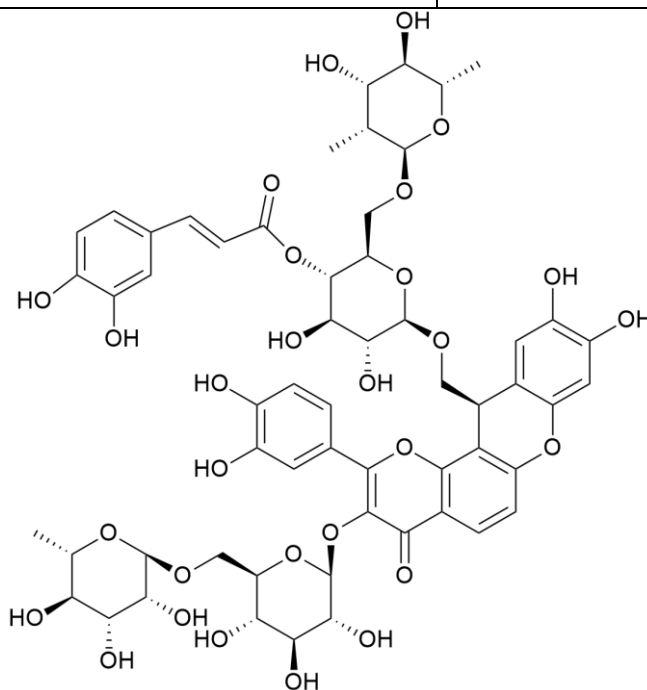

| Code   | Compound                                     | Reference             | Molecular Weight (Da) |
|--------|----------------------------------------------|-----------------------|-----------------------|
| PG_456 | Forsythoneosides C ( <i>M</i> CONFIGURATION) | (compound 113) – (31) | 1235.11               |

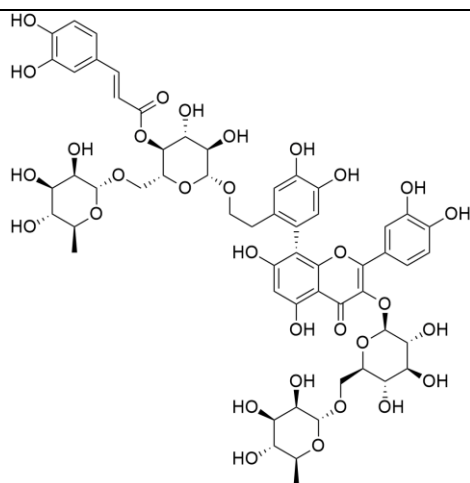

| Code   | Compound                                     | Reference             | Molecular Weight (Da) |
|--------|----------------------------------------------|-----------------------|-----------------------|
| PG_457 | Forsythoneosides D ( <i>P</i> CONFIGURATION) | (compound 114) – (31) | 1235.11               |

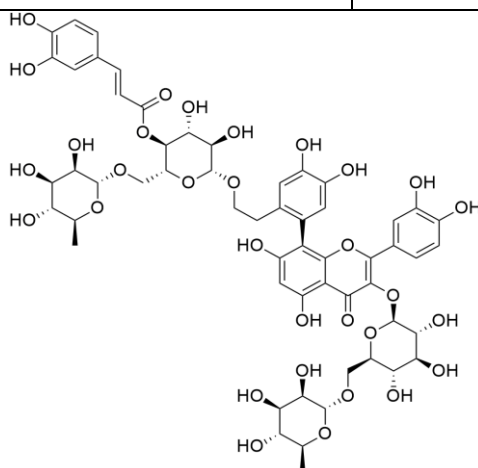

| Code   | Compound        | Reference             | Molecular Weight (Da) |
|--------|-----------------|-----------------------|-----------------------|
| PG_458 | NO TRIVIAL NAME | (compound 115) – (31) | 884.841               |

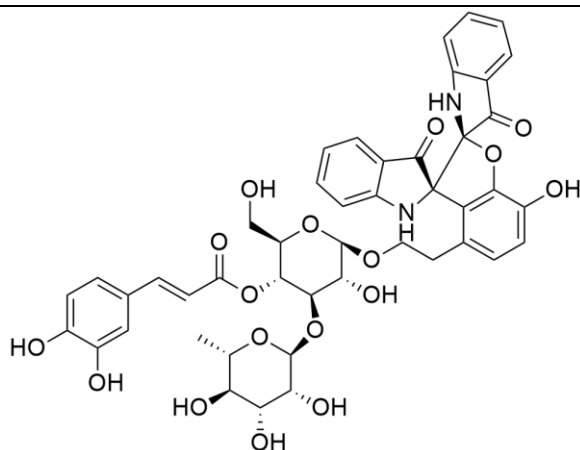

| Code   | Compound        | Reference             | Molecular Weight (Da) |
|--------|-----------------|-----------------------|-----------------------|
| PG_459 | NO TRIVIAL NAME | (compound 116) – (31) | 884.841               |

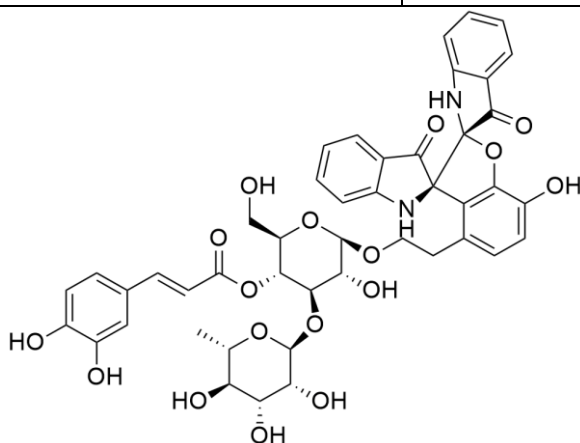

| Code   | Compound          | Reference             | Molecular Weight (Da) |
|--------|-------------------|-----------------------|-----------------------|
| PG_460 | Isocampneoside II | (compound 131) – (31) | 640.589               |

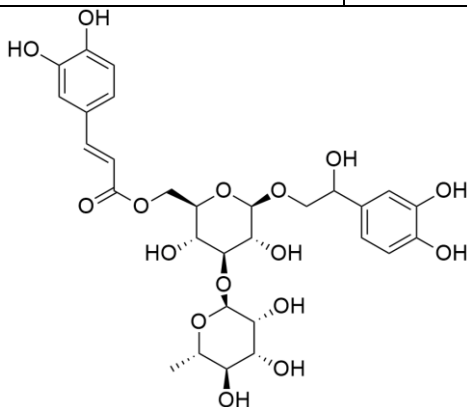

| Code                                                                                                                                                                                                                                                                                                                                                                                                                                                                     | Compound            | Reference             | Molecular Weight (Da) |
|--------------------------------------------------------------------------------------------------------------------------------------------------------------------------------------------------------------------------------------------------------------------------------------------------------------------------------------------------------------------------------------------------------------------------------------------------------------------------|---------------------|-----------------------|-----------------------|
| PG_462                                                                                                                                                                                                                                                                                                                                                                                                                                                                   | 2'-acetylacteoside  | (compound 137) – (31) | 666.627               |
| 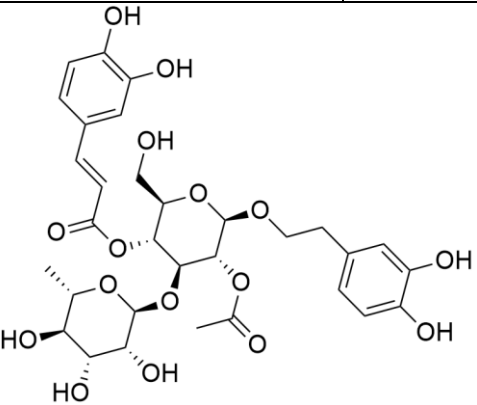 <p>The structure shows a central galactose molecule linked to a tyrosol unit and an acetylacteoside moiety. The tyrosol unit consists of a benzene ring with two hydroxyl groups at the 3 and 4 positions, connected via a propyl chain to the 2' position of the galactose. The acetylacteoside moiety is a complex structure with multiple hydroxyl groups and an acetyl group.</p> |                     |                       |                       |
| Code                                                                                                                                                                                                                                                                                                                                                                                                                                                                     | Compound            | Reference             | Molecular Weight (Da) |
| PG_463                                                                                                                                                                                                                                                                                                                                                                                                                                                                   | Tyrosol galactoside | (compound 140) – (31) | 300.306               |
|  <p>The structure shows a galactose molecule linked to a tyrosol unit. The tyrosol unit consists of a benzene ring with two hydroxyl groups at the 3 and 4 positions, connected via a propyl chain to the 2' position of the galactose.</p>                                                                                                                                          |                     |                       |                       |
| Code                                                                                                                                                                                                                                                                                                                                                                                                                                                                     | Compound            | Reference             | Molecular Weight (Da) |
| PG_464                                                                                                                                                                                                                                                                                                                                                                                                                                                                   | Osmanthuside H      | (compound 1) – (26)   | 432.42                |
|  <p>The structure shows a galactose molecule linked to a tyrosol unit and a glucose molecule. The tyrosol unit consists of a benzene ring with two hydroxyl groups at the 3 and 4 positions, connected via a propyl chain to the 2' position of the galactose. The glucose molecule is linked to the 4' position of the galactose.</p>                                               |                     |                       |                       |
| Code                                                                                                                                                                                                                                                                                                                                                                                                                                                                     | Compound            | Reference             | Molecular Weight (Da) |
| PG_465                                                                                                                                                                                                                                                                                                                                                                                                                                                                   | Osmanthuside I      | (compound 2) –        | 594.564               |



|                                                                                      |                     | (26)                |                       |
|--------------------------------------------------------------------------------------|---------------------|---------------------|-----------------------|
| 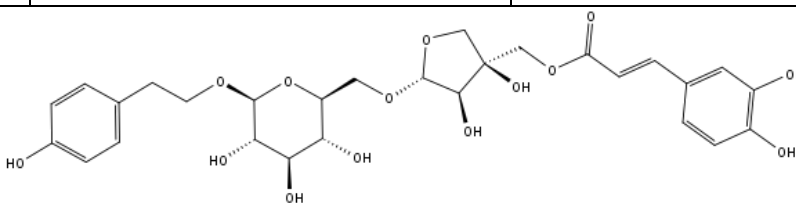   |                     |                     |                       |
| Code                                                                                 | Compound            | Reference           | Molecular Weight (Da) |
| PG_466                                                                               | Osmanthuside J      | (compound 3) – (26) | 608.591               |
|   |                     |                     |                       |
| Code                                                                                 | Compound            | Reference           | Molecular Weight (Da) |
| PG_467                                                                               | NO TRIVIAL NAME (4) | (compound 4) – (26) | 654.616               |
|  |                     |                     |                       |
| Code                                                                                 | Compound            | Reference           | Molecular Weight (Da) |
| PG_469                                                                               | Lipedosides A-II    | (compound 6) – (26) | 608.591               |

| 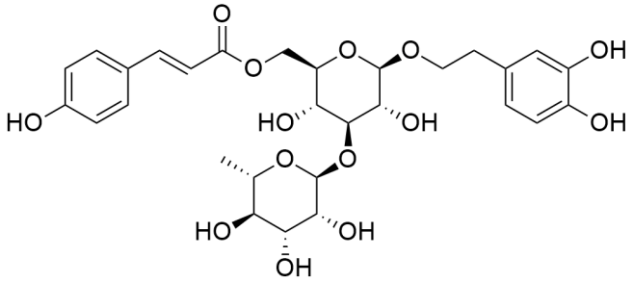   |                                             |                     |                       |
|--------------------------------------------------------------------------------------|---------------------------------------------|---------------------|-----------------------|
| Code                                                                                 | Compound                                    | Reference           | Molecular Weight (Da) |
| PG_470                                                                               | NO TRIVIAL NAME                             | (compound 7) – (26) | 772.747               |
|   |                                             |                     |                       |
| Code                                                                                 | Compound                                    | Reference           | Molecular Weight (Da) |
| PG_471                                                                               | 2-O-Acetyl-3'''-O-methylverbascoside        | (compound 8) – (26) | 654.616               |
|  |                                             |                     |                       |
| Code                                                                                 | Compound                                    | Reference           | Molecular Weight (Da) |
| PG_472                                                                               | 2,4''-Di-O-acetyl-3'''-O-methylverbascoside | (compound 9) – (26) | 696.653               |

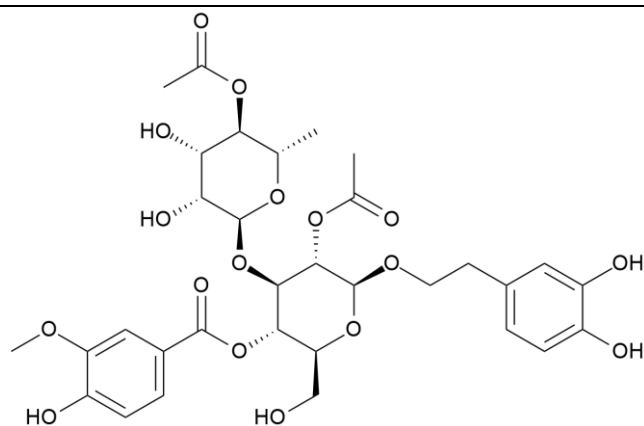

| Code   | Compound       | Reference            | Molecular Weight (Da) |
|--------|----------------|----------------------|-----------------------|
| PG_473 | Betonyosides A | (compound 10) – (26) | 654.616               |

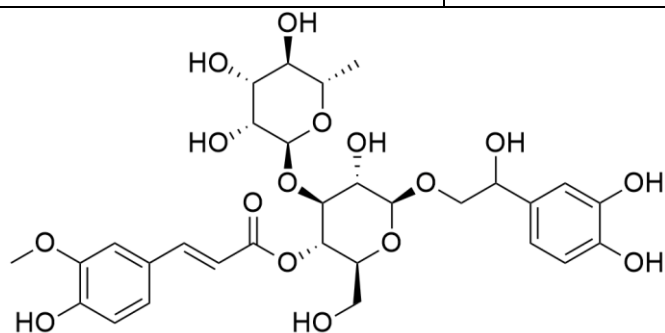

| Code   | Compound       | Reference            | Molecular Weight (Da) |
|--------|----------------|----------------------|-----------------------|
| PG_474 | Betonyosides D | (compound 11) – (26) | 784.758               |

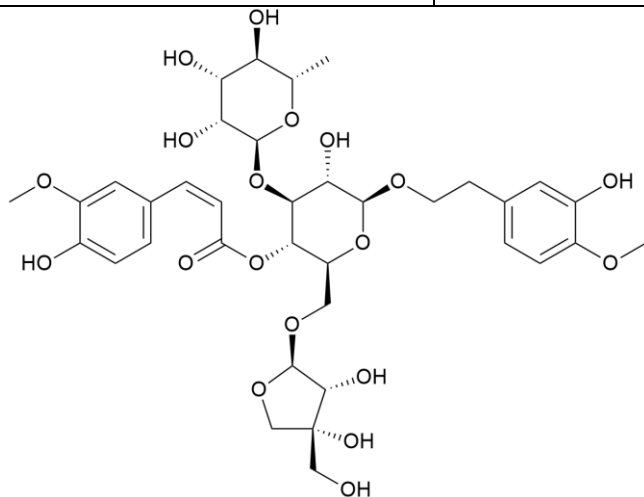

| Code | Compound | Reference | Molecular Weight (Da) |
|------|----------|-----------|-----------------------|
|      |          |           |                       |

| PG_475                                                                              | Betonyosides E                                                                                                                                                                | (compound 12) –<br>(26) | 770.731               |
|-------------------------------------------------------------------------------------|-------------------------------------------------------------------------------------------------------------------------------------------------------------------------------|-------------------------|-----------------------|
| 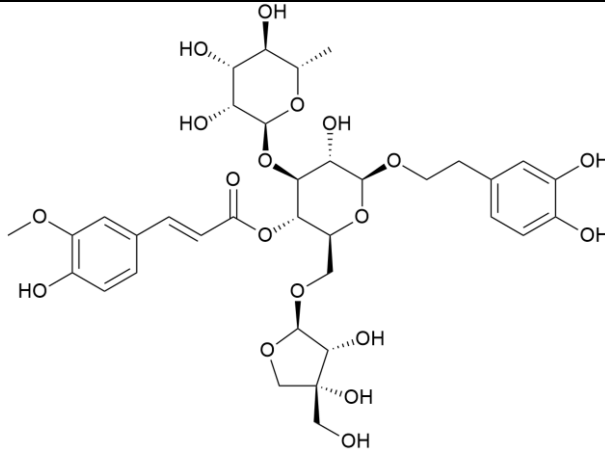  |                                                                                                                                                                               |                         |                       |
| Code                                                                                | Compound                                                                                                                                                                      | Reference               | Molecular Weight (Da) |
| PG_476                                                                              | Betonyosides F                                                                                                                                                                | (compound 13) –<br>(26) | 652.644               |
|  |                                                                                                                                                                               |                         |                       |
| Code                                                                                | Compound                                                                                                                                                                      | Reference               | Molecular Weight (Da) |
| PG_477                                                                              | 2-(3-Hydroxy-4-methoxy-phenyl)-ethyl-O-( $\alpha$ -L-rhamnosyl)-(1 $\rightarrow$ 3)-O-( $\alpha$ -L-rhamnosyl)-(1 $\rightarrow$ 6)-4-O-E-feruloyl- $\beta$ -D-glucopyranoside | (compound 14) –<br>(26) | 814.828               |

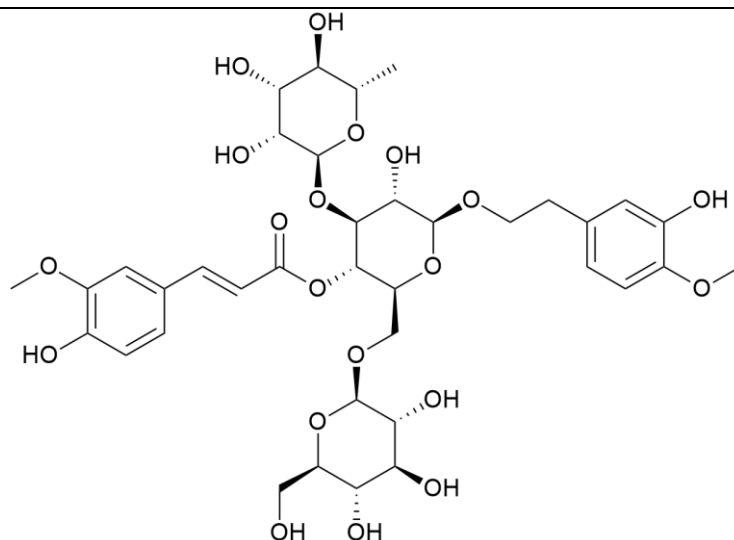

| Code   | Compound    | Reference            | Molecular Weight (Da) |
|--------|-------------|----------------------|-----------------------|
| PG_478 | Scrosides B | (compound 15) – (26) | 668.643               |

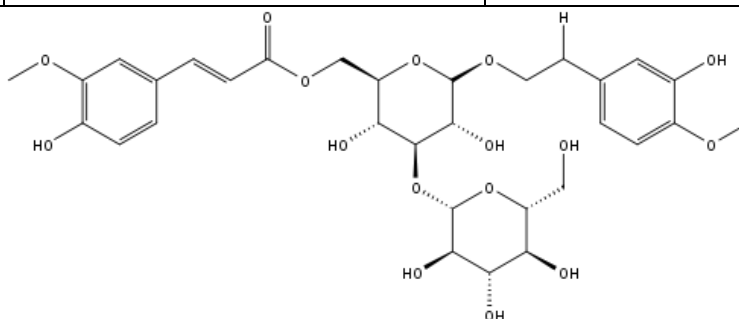

| Code   | Compound    | Reference            | Molecular Weight (Da) |
|--------|-------------|----------------------|-----------------------|
| PG_479 | Scrosides C | (compound 16) – (26) | 668.643               |

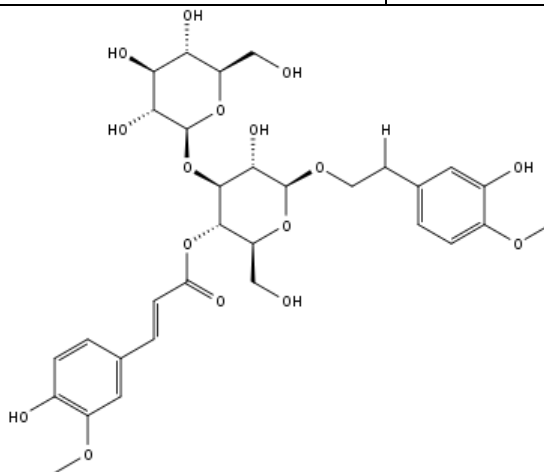

| Code                                                                                                                                                                                                                                                                                                           | Compound        | Reference            | Molecular Weight (Da) |
|----------------------------------------------------------------------------------------------------------------------------------------------------------------------------------------------------------------------------------------------------------------------------------------------------------------|-----------------|----------------------|-----------------------|
| PG_480                                                                                                                                                                                                                                                                                                         | NO TRIVIAL NAME | (compound 17) – (26) | 738.736               |
| 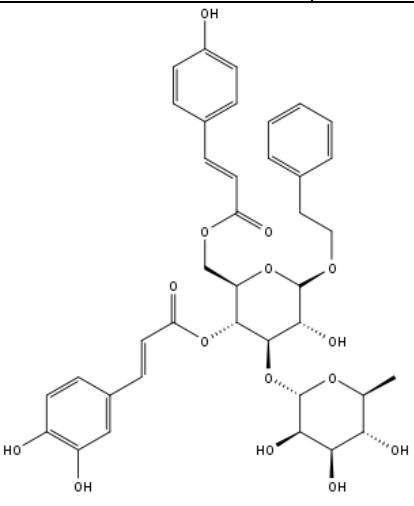 <p>The structure shows a central pyranose ring substituted with a p-coumaroyl group at C2, a p-coumaroyl group at C3, a benzyl group at C4, and a methyl group at C5. The C6 position is a CH2OH group.</p>                 |                 |                      |                       |
| Code                                                                                                                                                                                                                                                                                                           | Compound        | Reference            | Molecular Weight (Da) |
| PG_481                                                                                                                                                                                                                                                                                                         | Lophanthoside A | (compound 18) – (26) | 518.51                |
|  <p>The structure shows a central pyranose ring substituted with a methyl group at C2, a hydroxyl group at C3, an acetyl group at C4, and a 3,4,5-trimethoxyphenylethyl group at C6. The C1 position is a CH2OH group.</p> |                 |                      |                       |
| Code                                                                                                                                                                                                                                                                                                           | Compound        | Reference            | Molecular Weight (Da) |
| PG_482                                                                                                                                                                                                                                                                                                         | NO TRIVIAL NAME | (compound 19) – (26) | 794.797               |



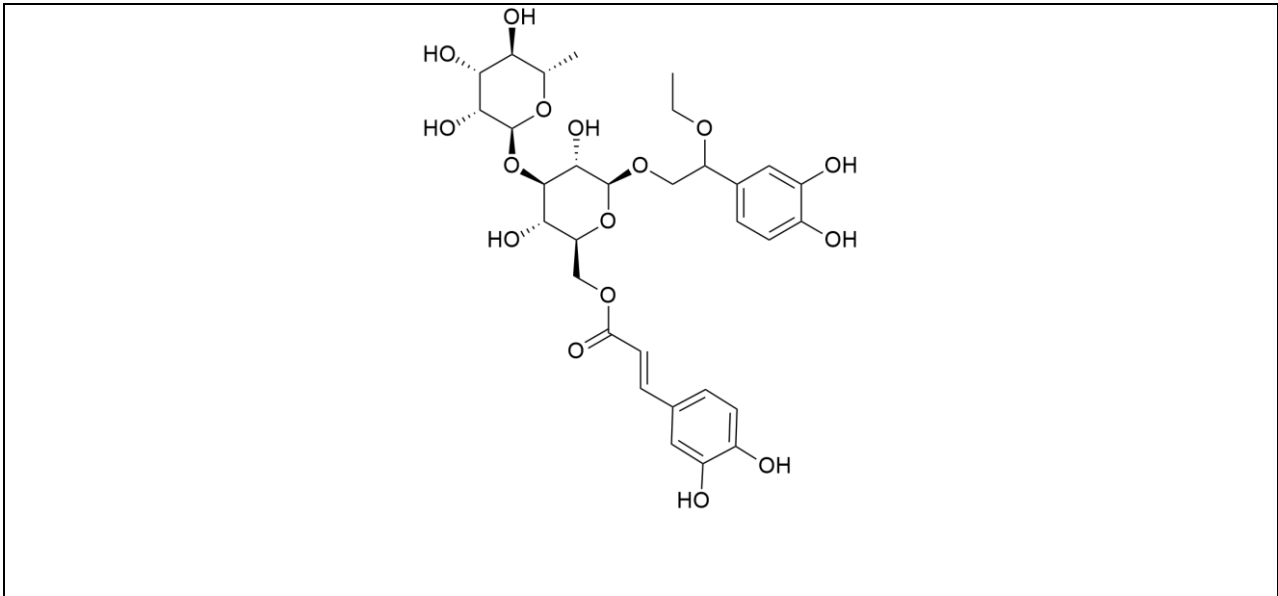

| Code   | Compound        | Reference            | Molecular Weight (Da) |
|--------|-----------------|----------------------|-----------------------|
| PG_485 | Digicilisides A | (compound 23) – (26) | 814.784               |

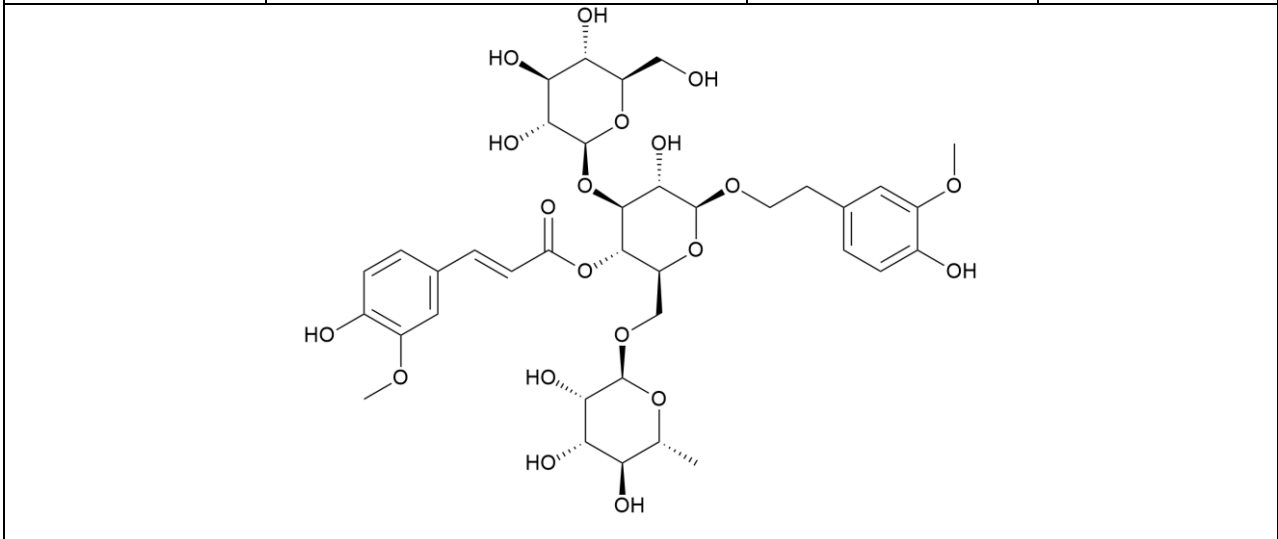

| Code   | Compound        | Reference            | Molecular Weight (Da) |
|--------|-----------------|----------------------|-----------------------|
| PG_486 | Digicilisides B | (compound 24) – (26) | 932.872               |



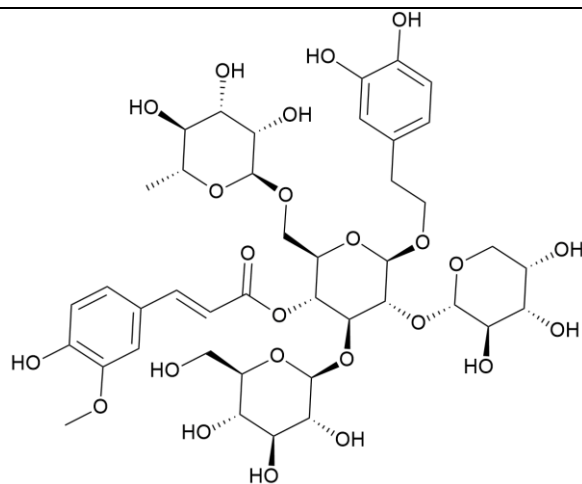

| Code   | Compound      | Reference            | Molecular Weight (Da) |
|--------|---------------|----------------------|-----------------------|
| PG_487 | Digicilides C | (compound 25) – (26) | 950.89                |

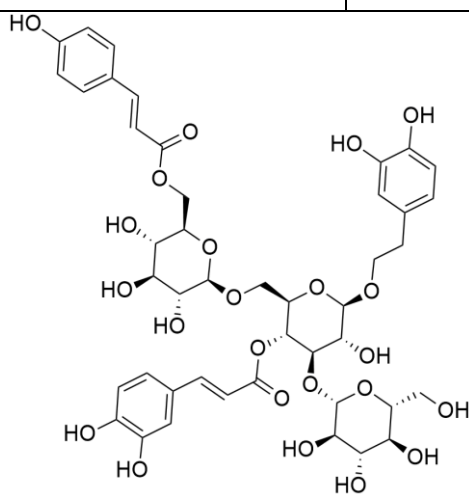

| Code   | Compound                                                                                                                                                                      | Reference            | Molecular Weight (Da) |
|--------|-------------------------------------------------------------------------------------------------------------------------------------------------------------------------------|----------------------|-----------------------|
| PG_488 | $\alpha$ -L-Rhamnopyranosyl-(1 $\rightarrow$ 2)- $\beta$ -D-[4''-(8E)-7-(3,4-dihydroxyphenyl)-8-propenoate,1''-O-(7S)-7-(3,4-dihydroxyphenyl)-7-methoxyethyl]-glucopyranoside | (compound 26) – (26) | 654.616               |

| 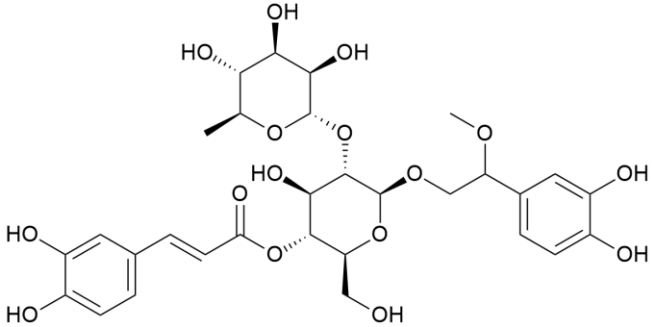   |                                                                                                         |                      |                       |
|--------------------------------------------------------------------------------------|---------------------------------------------------------------------------------------------------------|----------------------|-----------------------|
| Code                                                                                 | Compound                                                                                                | Reference            | Molecular Weight (Da) |
| PG_489                                                                               | Digiviridifloroside                                                                                     | (compound 27) – (26) | 816.759               |
|   |                                                                                                         |                      |                       |
| Code                                                                                 | Compound                                                                                                | Reference            | Molecular Weight (Da) |
| PG_490                                                                               | 2-(4-Hydroxyphenyl)ethanol-O- $\beta$ -Dglucopyranosyl-(1 $\rightarrow$ 2)-O- $\beta$ -Dglucopyranoside | (compound 28) – 29]  | 462.446               |
|  |                                                                                                         |                      |                       |
| Code                                                                                 | Compound                                                                                                | Reference            | Molecular Weight (Da) |
| PG_491                                                                               | Forsythoside M                                                                                          | (compound 29) – (26) | 450.438               |

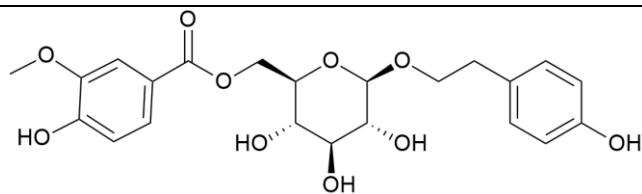

| Code   | Compound       | Reference            | Molecular Weight (Da) |
|--------|----------------|----------------------|-----------------------|
| PG_492 | Forsythoside N | (compound 30) – (26) | 450.438               |

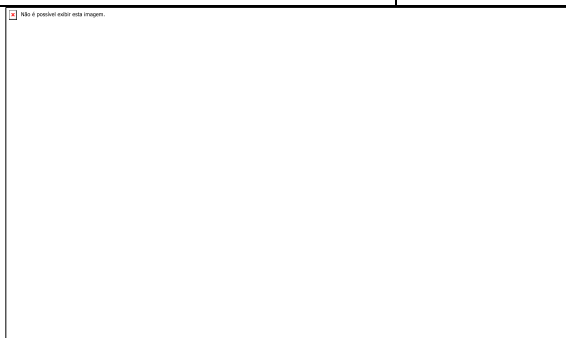

| Code   | Compound       | Reference            | Molecular Weight (Da) |
|--------|----------------|----------------------|-----------------------|
| PG_493 | Forsythoside P | (compound 31) – (26) | 608.591               |

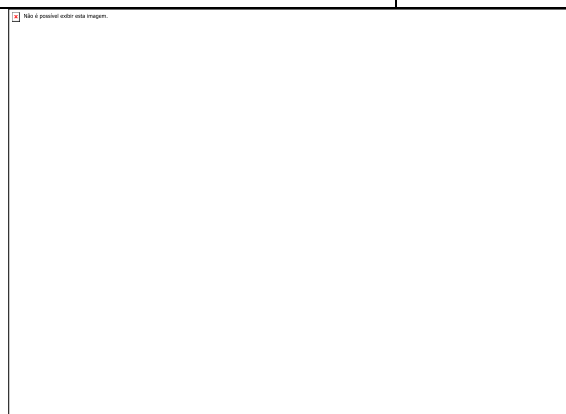

| Code   | Compound           | Reference            | Molecular Weight (Da) |
|--------|--------------------|----------------------|-----------------------|
| PG_494 | Hodgsonialloside A | (compound 32) – (26) | 330.332               |

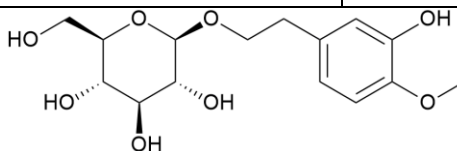

| Code | Compound | Reference | Molecular |
|------|----------|-----------|-----------|
|------|----------|-----------|-----------|

|                                                                                      |                                                                                     |                      | Weight (Da)           |
|--------------------------------------------------------------------------------------|-------------------------------------------------------------------------------------|----------------------|-----------------------|
| PG_495                                                                               | Hodgsonialloside B                                                                  | (compound 33) – (26) | 492.472               |
| 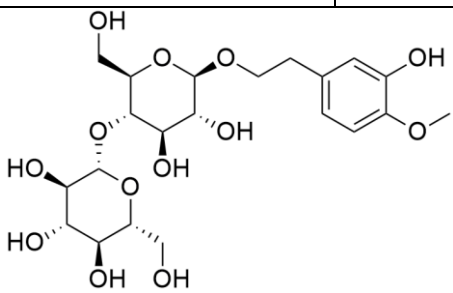   |                                                                                     |                      |                       |
| Code                                                                                 | Compound                                                                            | Reference            | Molecular Weight (Da) |
| PG_496                                                                               | Hodgsonialloside C                                                                  | (compound 34) – (26) | 330.332               |
|   |                                                                                     |                      |                       |
| Code                                                                                 | Compound                                                                            | Reference            | Molecular Weight (Da) |
| PG_497                                                                               | 1-β-p-Hydroxyphenyl-ethyl-2-O-acetyl-3,6-di-α-L-rhamnopyranosyl-β-D-glucopyranoside | (compound 35) – (26) | 634.625               |
|  |                                                                                     |                      |                       |
| Code                                                                                 | Compound                                                                            | Reference            | Molecular Weight (Da) |
| PG_498                                                                               | 1-β-p-Hydroxyphenyl-ethyl-3,6-O-di-α-L-rhamnopyranosyl-β-D-                         | (compound 36) –      | 592.589               |

|        | glucopyranoside                                                                                   | (26)                 |                       |
|--------|---------------------------------------------------------------------------------------------------|----------------------|-----------------------|
|        |                                                                                                   |                      |                       |
| Code   | Compound                                                                                          | Reference            | Molecular Weight (Da) |
| PG_499 | 1-β-p-Hydroxyphenyl-ethyl-2-O-acetyl-3,6-di-α-L-rhamnopyranosyl-4-p-coumaroyl-β-D-glucopyranoside | (compound 37) – (26) | 782.786               |
|        |                                                                                                   |                      |                       |
| Code   | Compound                                                                                          | Reference            | Molecular Weight (Da) |
| PG_500 | 1-β-p-hydroxyphenyl-ethyl-3,6-di-α-Lrhamnopyranosyl-4-p-coumaroyl-β-Dglucopyranoside              | (compound 38) – (26) | 738.733               |

| 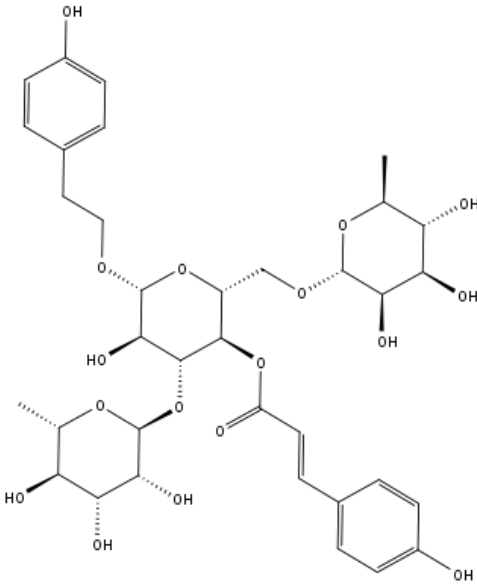 <p>The structure shows a central disaccharide core consisting of a glucose unit linked to a galactose unit. The glucose unit is substituted at C1 with a 4-hydroxyphenylethoxy group, at C2 with a hydroxyl group, and at C3 with a galactose unit. The galactose unit is substituted at C1 with a 2,3,4,6-tetrahydroxyphenylethoxy group, at C2 with a hydroxyl group, and at C3 with an acrylate group. The acrylate group is further substituted with a 4-hydroxyphenyl ring.</p>                       |                  |                      |                       |
|-----------------------------------------------------------------------------------------------------------------------------------------------------------------------------------------------------------------------------------------------------------------------------------------------------------------------------------------------------------------------------------------------------------------------------------------------------------------------------------------------------------------------------------------------------------------------------------------------|------------------|----------------------|-----------------------|
| Code                                                                                                                                                                                                                                                                                                                                                                                                                                                                                                                                                                                          | Compound         | Reference            | Molecular Weight (Da) |
| PG_501                                                                                                                                                                                                                                                                                                                                                                                                                                                                                                                                                                                        | Ternifolioside F | (compound 39) – (26) | 872.867               |
|  <p>The structure shows a central disaccharide core consisting of a glucose unit linked to a galactose unit. The glucose unit is substituted at C1 with a 4-hydroxy-3-methoxyphenylethoxy group, at C2 with a hydroxyl group, and at C3 with a galactose unit. The galactose unit is substituted at C1 with a 2,3,4,6-tetrahydroxyphenylethoxy group, at C2 with a hydroxyl group, and at C3 with an acrylate group. The acrylate group is further substituted with a 4-hydroxy-3-methoxyphenyl ring.</p> |                  |                      |                       |
| Code                                                                                                                                                                                                                                                                                                                                                                                                                                                                                                                                                                                          | Compound         | Reference            | Molecular Weight (Da) |
| PG_502                                                                                                                                                                                                                                                                                                                                                                                                                                                                                                                                                                                        | Ternifolioside G | (compound 40) – (26) | 874.883               |

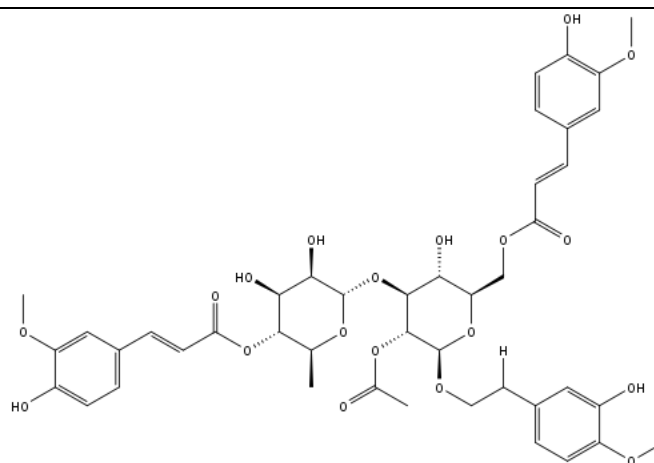

| Code   | Compound         | Reference            | Molecular Weight (Da) |
|--------|------------------|----------------------|-----------------------|
| PG_503 | Ternifolioside H | (compound 41) – (26) | 694.68                |

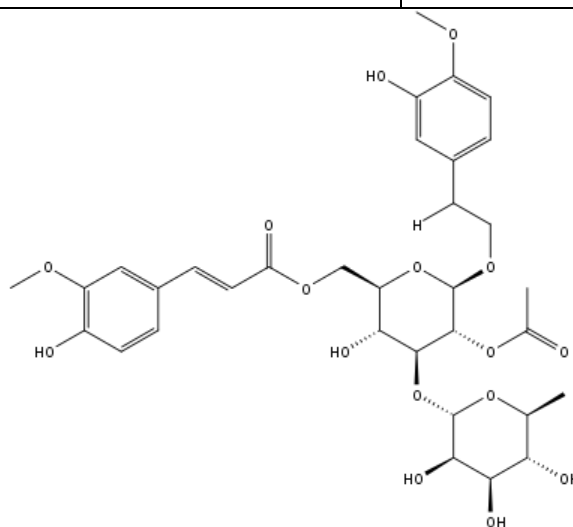

| Code   | Compound         | Reference            | Molecular Weight (Da) |
|--------|------------------|----------------------|-----------------------|
| PG_504 | Digidavisoside A | (compound 44) – (26) | 816.756               |

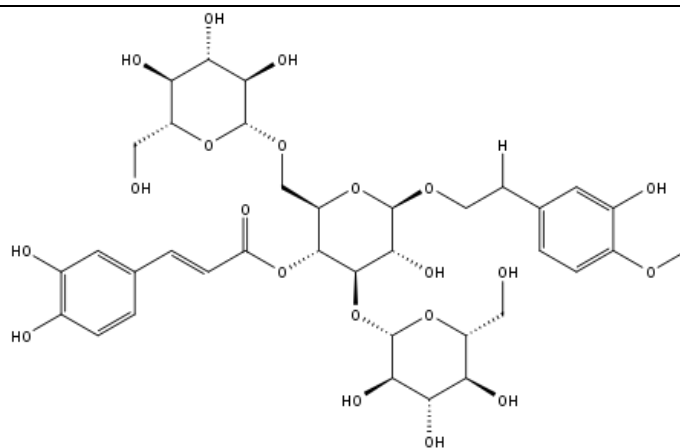

| Code   | Compound         | Reference            | Molecular Weight (Da) |
|--------|------------------|----------------------|-----------------------|
| PG_505 | Digidavisoside B | (compound 45) – (26) | 830.783               |

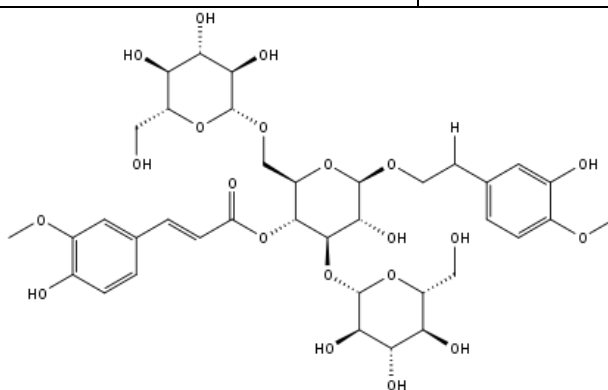

| Code   | Compound   | Reference            | Molecular Weight (Da) |
|--------|------------|----------------------|-----------------------|
| PG_506 | Davisoside | (compound 46) – (26) | 800.757               |

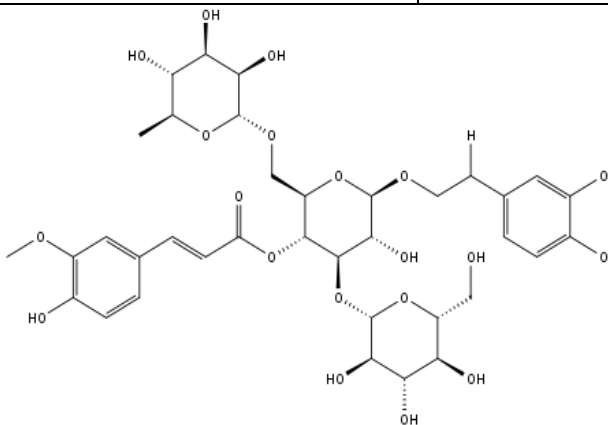



| Code   | Compound                                                                                                                   | Reference            | Molecular Weight (Da) |
|--------|----------------------------------------------------------------------------------------------------------------------------|----------------------|-----------------------|
| PG_507 | 3,4-Dihydroxyphenyl)ethyl 2-O-[5-O-(4-hydroxy-3,5-dimethoxybenzoyl)- $\beta$ -D-apiofuranosyl]- $\beta$ -D-glucopyranoside | (compound 47) – (26) | 626.578               |

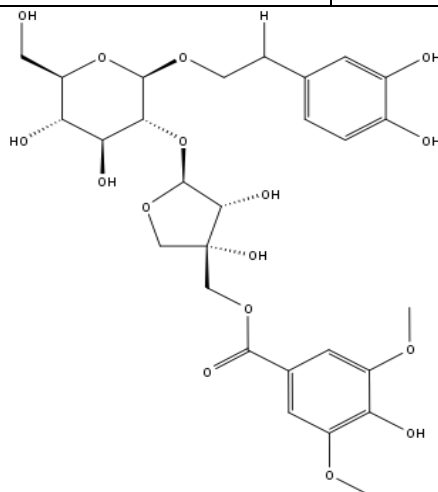

| Code   | Compound                                                                                                         | Reference            | Molecular Weight (Da) |
|--------|------------------------------------------------------------------------------------------------------------------|----------------------|-----------------------|
| PG_508 | 3,4-Dihydroxyphenyl)ethyl 2-O-[5-O-(3,4-Dihydroxybenzoyl)- $\beta$ -D-apiofuranosyl]- $\beta$ -D-glucopyranoside | (compound 48) – (26) | 584.525               |

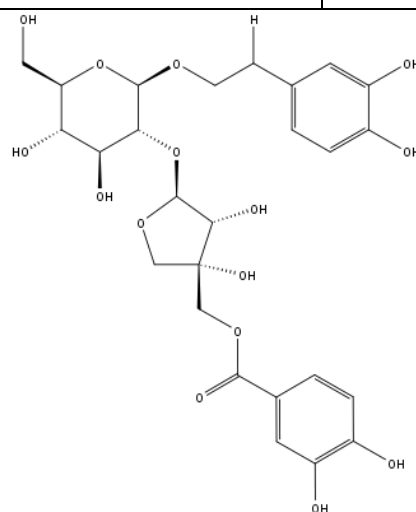

| Code | Compound | Reference | Molecular |
|------|----------|-----------|-----------|
|------|----------|-----------|-----------|

|        |                                                                                                                                                |                      |             |
|--------|------------------------------------------------------------------------------------------------------------------------------------------------|----------------------|-------------|
|        |                                                                                                                                                |                      | Weight (Da) |
| PG_509 | 2-(3,4-Dihydroxyphenyl)-ethyl 1-O-[4-O-feruloyl-2-O- $\alpha$ -L-rhamnopyranosyl-3-O- $\alpha$ -L-rhamnopyranosyl]- $\beta$ -D-glucopyranoside | (compound 49) – (26) | 786.774     |

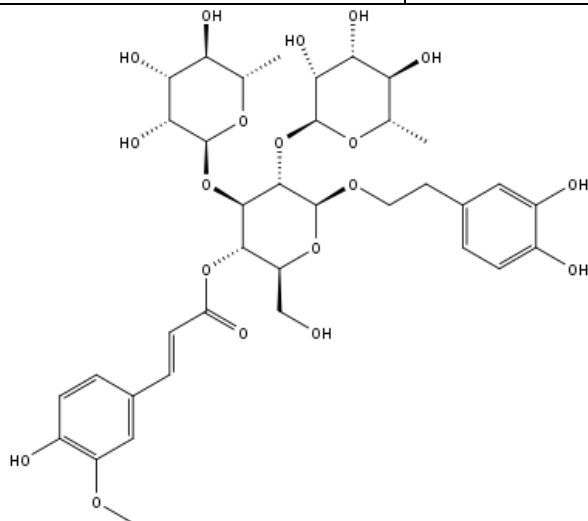

| Code   | Compound                                                                                                                                        | Reference            | Molecular Weight (Da) |
|--------|-------------------------------------------------------------------------------------------------------------------------------------------------|----------------------|-----------------------|
| PG_510 | 2-(3,4-Dihydroxyphenyl)-ethyl 1-O-[4-O-coumaroyl-2-O- $\alpha$ -L-rhamnopyranosyl-3-O- $\alpha$ -L-rhamnopyranosyl]- $\beta$ -D-glucopyranoside | (compound 50) – (26) | 754.732               |

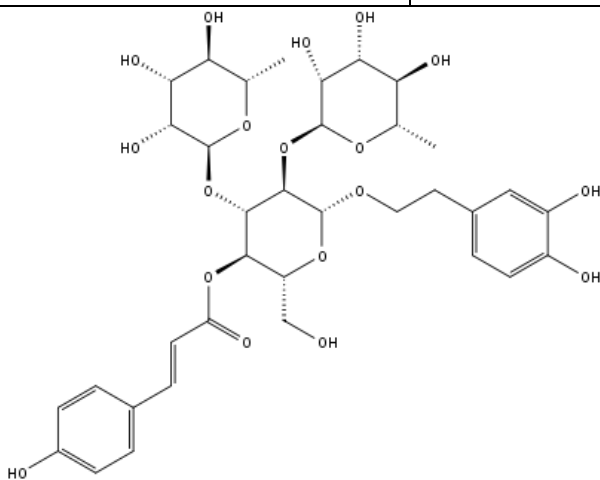

| Code | Compound | Reference | Molecular Weight (Da) |
|------|----------|-----------|-----------------------|
|------|----------|-----------|-----------------------|

|                                                                                      |                    |                         |                       |
|--------------------------------------------------------------------------------------|--------------------|-------------------------|-----------------------|
| PG_511                                                                               | Steviophethanoside | (compound 51) –<br>(26) | 432.42                |
| 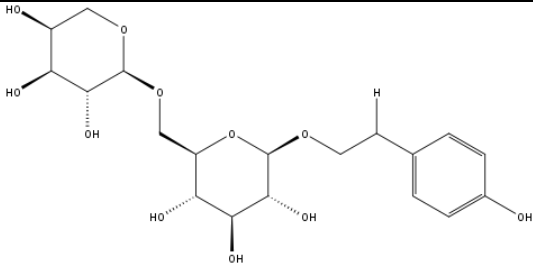   |                    |                         |                       |
| Code                                                                                 | Compound           | Reference               | Molecular Weight (Da) |
| PG_512                                                                               | NO TRIVIAL NAME    | (compound 52) –<br>(26) | 608.591               |
|   |                    |                         |                       |
| Code                                                                                 | Compound           | Reference               | Molecular Weight (Da) |
| PG_513                                                                               | Terngymnosides A   | (compound 53) –<br>(26) | 616.57                |
|  |                    |                         |                       |
| Code                                                                                 | Compound           | Reference               | Molecular Weight (Da) |

|                                                                                      |                  |                         |                       |
|--------------------------------------------------------------------------------------|------------------|-------------------------|-----------------------|
| PG_514                                                                               | Terngymnosides B | (compound 54) –<br>(26) | 600.571               |
| 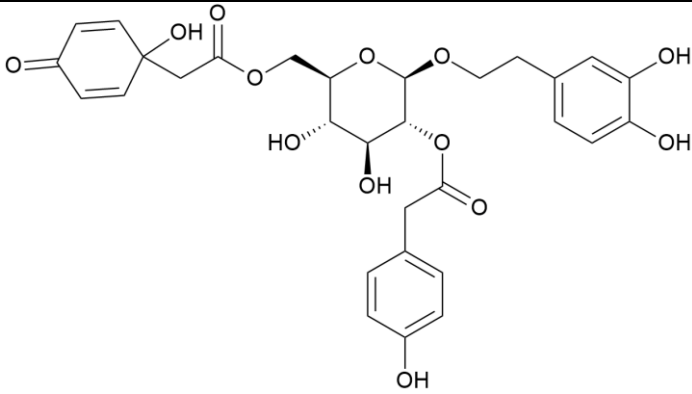   |                  |                         |                       |
| Code                                                                                 | Compound         | Reference               | Molecular Weight (Da) |
| PG_515                                                                               | Terngymnosides C | (compound 55) –<br>(26) | 466.437               |
|   |                  |                         |                       |
| Code                                                                                 | Compound         | Reference               | Molecular Weight (Da) |
| PG_516                                                                               | Terngymnosides D | (compound 56) –<br>(26) | 602.587               |
|  |                  |                         |                       |
| Code                                                                                 | Compound         | Reference               | Molecular Weight (Da) |
| PG_517                                                                               | Nepetifosides D  | (compound 57) –<br>(26) | 800.757               |

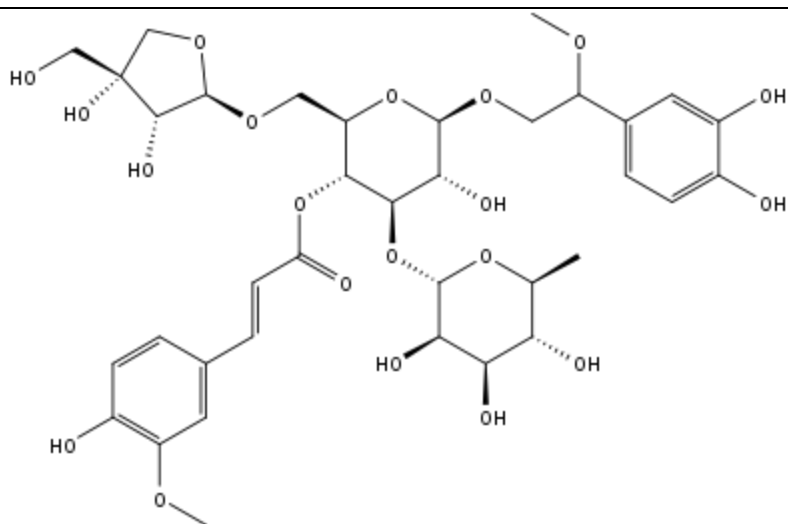

| Code   | Compound    | Reference            | Code    |
|--------|-------------|----------------------|---------|
| PG_518 | Flavaioside | (compound 59) – (26) | 974.956 |

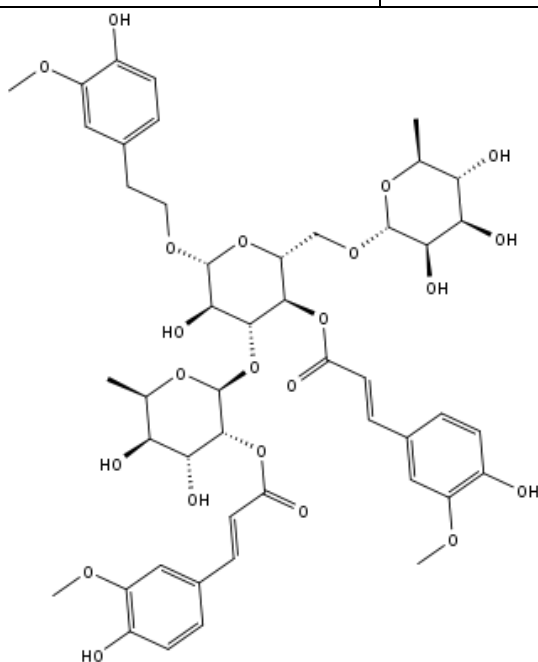

| Code   | Compound        | Reference            | Molecular Weight (Da) |
|--------|-----------------|----------------------|-----------------------|
| PG_519 | Nepetifosides F | (compound 58) – (26) | 840.822               |

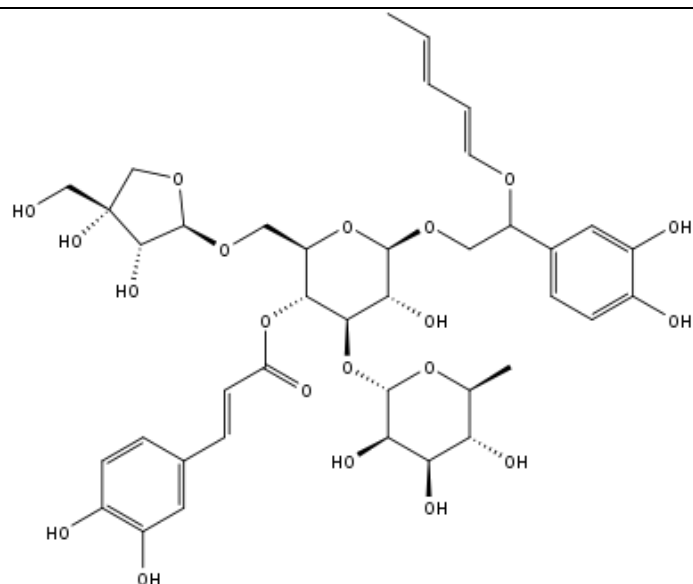

| Code   | Compound   | Reference            | Molecular Weight (Da) |
|--------|------------|----------------------|-----------------------|
| PG_520 | Ramoside A | (compound 60) – (26) | 754.732               |

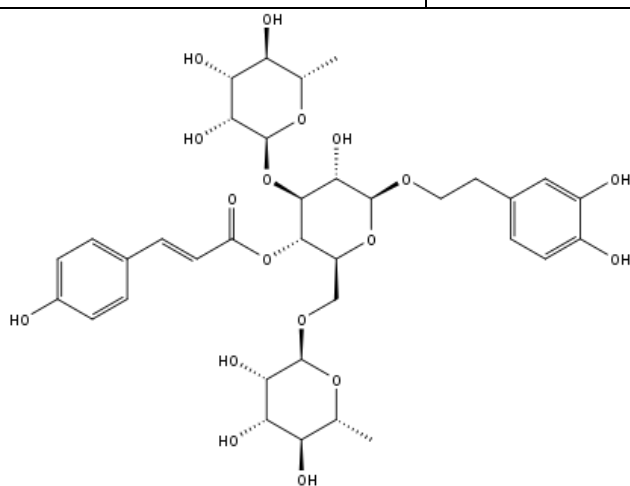

| Code   | Compound           | Reference            | Molecular Weight (Da) |
|--------|--------------------|----------------------|-----------------------|
| PG_521 | 2'-Acetylrmoside A | (compound 61) – (26) | 796.769               |

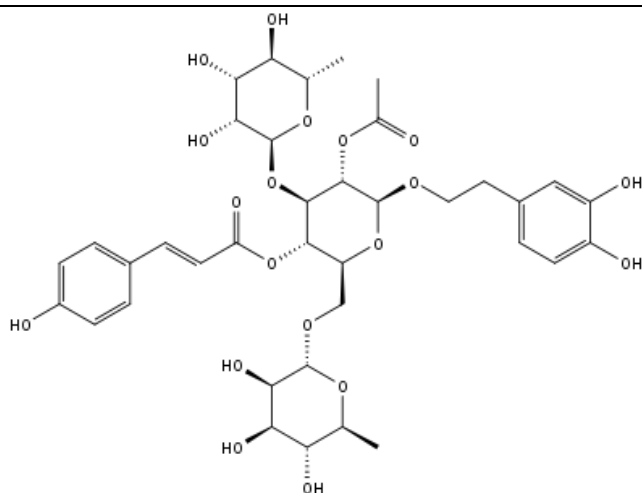

| Code   | Compound        | Reference            | Molecular Weight (Da) |
|--------|-----------------|----------------------|-----------------------|
| PG_522 | Rostkovianoside | (compound 62) – (26) | 608.588               |

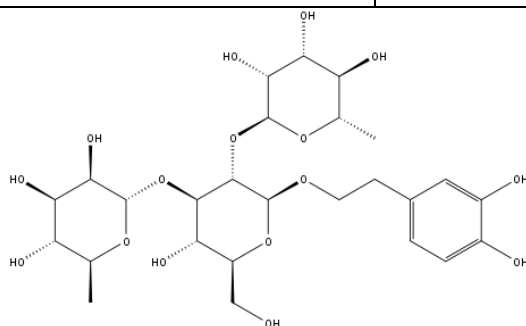

| Code   | Compound                   | Reference            | Molecular Weight (Da) |
|--------|----------------------------|----------------------|-----------------------|
| PG_523 | 6'-O-Acetylcrassifolioside | (compound 63) – (26) | 814.784               |

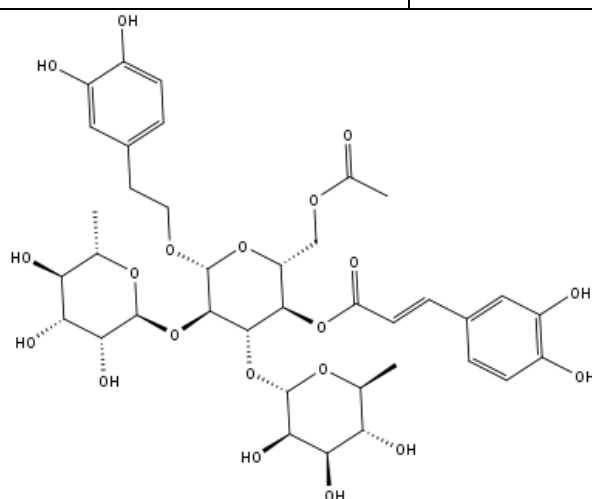

| Code | Compound | Reference | Molecular Weight |
|------|----------|-----------|------------------|
|------|----------|-----------|------------------|

|        |                   |                         |                          |
|--------|-------------------|-------------------------|--------------------------|
|        |                   |                         | (Da)                     |
| PG_524 | Macrophylloside E | (compound 64) –<br>(26) | 592.592                  |
|        |                   |                         |                          |
| Code   | Compound          | Reference               | Molecular Weight<br>(Da) |
| PG_525 | Macrophylloside F | (compound 65) –<br>(26) | 640.589                  |
|        |                   |                         |                          |
| Code   | Compound          | Reference               | Molecular Weight<br>(Da) |
| PG_526 | Ginkgoside C      | (compound 66) –<br>(26) | 478.445                  |



| 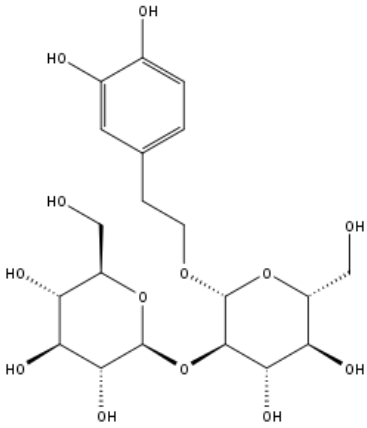   |                                                                                                             |                      |                       |
|--------------------------------------------------------------------------------------|-------------------------------------------------------------------------------------------------------------|----------------------|-----------------------|
| Code                                                                                 | Compound                                                                                                    | Reference            | Molecular Weight (Da) |
| PG_527                                                                               | Ginkgoside D                                                                                                | (compound 67) – (26) | 478.445               |
|   |                                                                                                             |                      |                       |
| Code                                                                                 | Compound                                                                                                    | Reference            | Molecular Weight (Da) |
| PG_528                                                                               | Sanangoside                                                                                                 | (compound 68) – (26) | 478.448               |
|  |                                                                                                             |                      |                       |
| Code                                                                                 | Compound                                                                                                    | Reference            | Molecular Weight (Da) |
| PG_529                                                                               | 2-(3,4-Dihydroxyphenyl)ethyl- O- $\alpha$ -L-rhamnopyranosyl-(1 $\rightarrow$ 2)- $\beta$ -D-allopyranoside | (compound 69) – (26) | 462.446               |

| 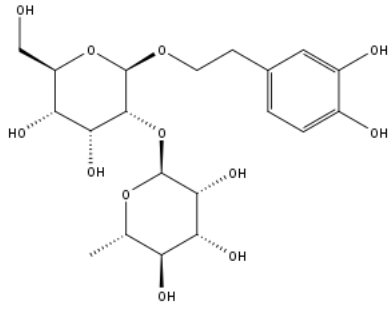   |                                                                                                                    |                      |                       |
|--------------------------------------------------------------------------------------|--------------------------------------------------------------------------------------------------------------------|----------------------|-----------------------|
| Code                                                                                 | Compound                                                                                                           | Reference            | Molecular Weight (Da) |
| PG_530                                                                               | 2-(3,4-Dihydroxyphenyl)ethyl-O- $\beta$ -D-xylopyranosyl-(1 $\rightarrow$ 6)- $\beta$ -D-allopyranoside            | (compound 70) – (26) | 448.419               |
|   |                                                                                                                    |                      |                       |
| Code                                                                                 | Compound                                                                                                           | Reference            | Molecular Weight (Da) |
| PG_531                                                                               | 8'-(3,4-Dihydroxyphenyl)ethyl-O- $\alpha$ -L-rhamnopyranosyl-(1-4)-2-O-(E)-caffeoyl- $\alpha$ -L-arabinopyranoside | (compound 71) – (26) | 756.704               |
|  |                                                                                                                    |                      |                       |
| Code                                                                                 | Compound                                                                                                           | Reference            | Molecular Weight (Da) |
| PG_532                                                                               | Ligupurpurosides C                                                                                                 | (compound 74) –      | 738.733               |

|                                                                                      |                    |                      |                       |
|--------------------------------------------------------------------------------------|--------------------|----------------------|-----------------------|
|                                                                                      |                    | (26)                 |                       |
| 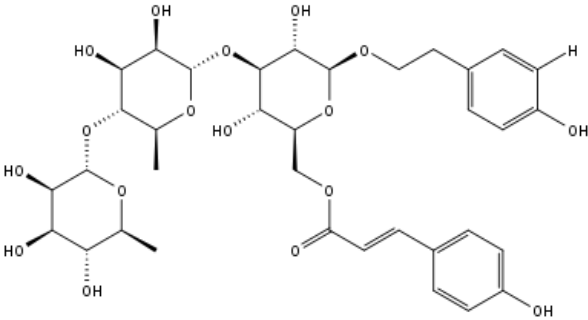   |                    |                      |                       |
| Code                                                                                 | Compound           | Reference            | Molecular Weight (Da) |
| PG_533                                                                               | Ligupurpurosides D | (compound 75) – (26) | 754.732               |
|   |                    |                      |                       |
| Code                                                                                 | Compound           | Reference            | Molecular Weight (Da) |
| PG_534                                                                               | Barlerinoside      | (compound 76) – (26) | 932.872               |
|  |                    |                      |                       |

| Code                                                                                                                                                                                                                                                                                                                                                                                                                                                                                                                                                                                                                                                                                                                                       | Compound        | Reference            | Molecular Weight (Da) |
|--------------------------------------------------------------------------------------------------------------------------------------------------------------------------------------------------------------------------------------------------------------------------------------------------------------------------------------------------------------------------------------------------------------------------------------------------------------------------------------------------------------------------------------------------------------------------------------------------------------------------------------------------------------------------------------------------------------------------------------------|-----------------|----------------------|-----------------------|
| PG_535                                                                                                                                                                                                                                                                                                                                                                                                                                                                                                                                                                                                                                                                                                                                     | Nepefifosides B | (compound 77) – (26) | 770.731               |
| 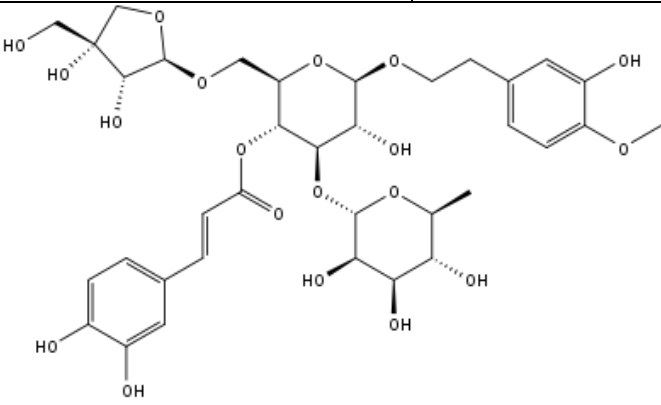 <p>The structure of Nepefifosides B consists of a central disaccharide core. The left sugar is a pyranose ring with a furanose ring attached at the C2 position. The right sugar is a pyranose ring with a furanose ring attached at the C2 position. The two pyranose rings are linked at their C1 positions. The furanose rings are linked at their C5 positions. The structure is substituted with a 3,4,5-trihydroxybenzoyl group at the C6 position of the left pyranose ring, a 3,4,5-trihydroxybenzyl group at the C6 position of the right pyranose ring, and a 3,4,5-trihydroxybenzyl group at the C6 position of the right furanose ring.</p> |                 |                      |                       |
| Code                                                                                                                                                                                                                                                                                                                                                                                                                                                                                                                                                                                                                                                                                                                                       | Compound        | Reference            | Molecular Weight (Da) |
| PG_536                                                                                                                                                                                                                                                                                                                                                                                                                                                                                                                                                                                                                                                                                                                                     | Nepefifosides C | (compound 78) – (26) | 902.846               |
|  <p>The structure of Nepefifosides C is similar to Nepefifosides B, but it features an additional pyranose ring attached to the right furanose ring at its C5 position. This third sugar is a pyranose ring with a furanose ring attached at its C2 position. The structure is substituted with a 3,4,5-trihydroxybenzoyl group at the C6 position of the left pyranose ring, a 3,4,5-trihydroxybenzyl group at the C6 position of the right pyranose ring, and a 3,4,5-trihydroxybenzyl group at the C6 position of the right furanose ring.</p>                                                                                                      |                 |                      |                       |
| Code                                                                                                                                                                                                                                                                                                                                                                                                                                                                                                                                                                                                                                                                                                                                       | Compound        | Reference            | Molecular Weight (Da) |
| PG_537                                                                                                                                                                                                                                                                                                                                                                                                                                                                                                                                                                                                                                                                                                                                     | Nepefifosides E | (compound 79) – (26) | 890.835               |

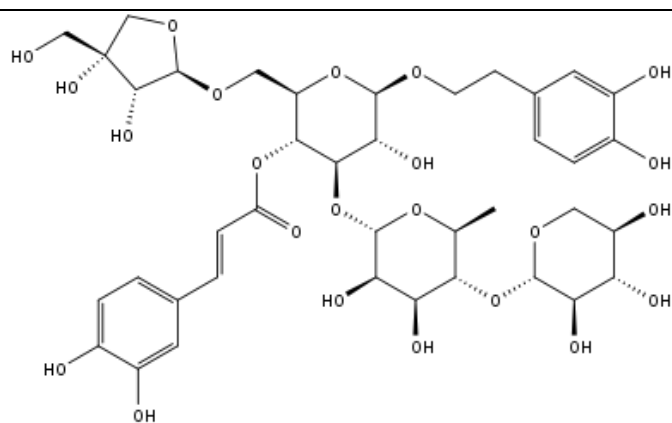

| Code   | Compound        | Reference            | Molecular Weight (Da) |
|--------|-----------------|----------------------|-----------------------|
| PG_538 | Nepetifosides G | (compound 80) – (26) | 724.706               |

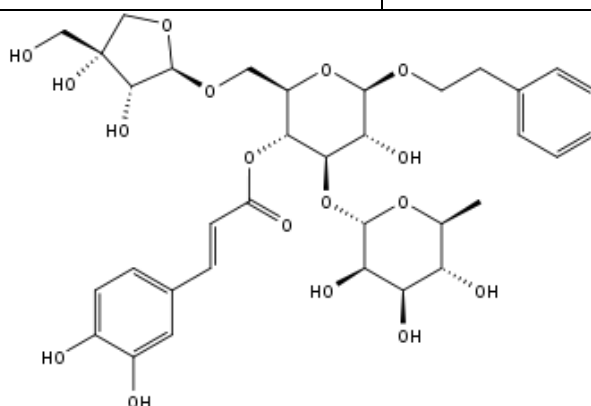

| Code   | Compound        | Reference            | Molecular Weight (Da) |
|--------|-----------------|----------------------|-----------------------|
| PG_539 | Nepetifosides H | (compound 81) – (26) | 754.732               |

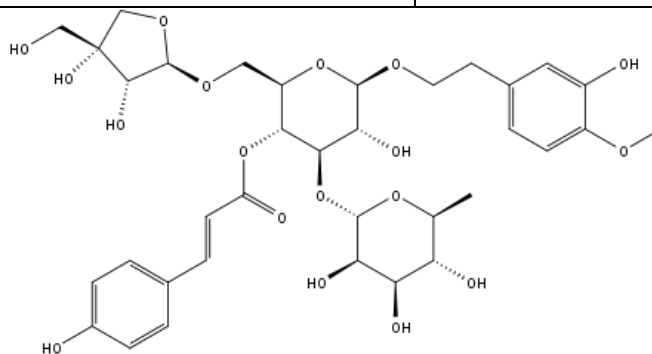

| Code | Compound | Reference | Molecular Weight |
|------|----------|-----------|------------------|
|------|----------|-----------|------------------|

|        |                 |                         | (Da)                     |
|--------|-----------------|-------------------------|--------------------------|
| PG_540 | Nepetifosides K | (compound 82) –<br>(26) | 758.72                   |
|        |                 |                         |                          |
| Code   | Compound        | Reference               | Molecular Weight<br>(Da) |
| PG_541 | Nepetifosides L | (compound 83) –<br>(26) | 902.846                  |
|        |                 |                         |                          |
| Code   | Compound        | Reference               | Molecular Weight<br>(Da) |
| PG_542 | Lagotiside C    | (compound 84) –<br>(26) | 786.73                   |

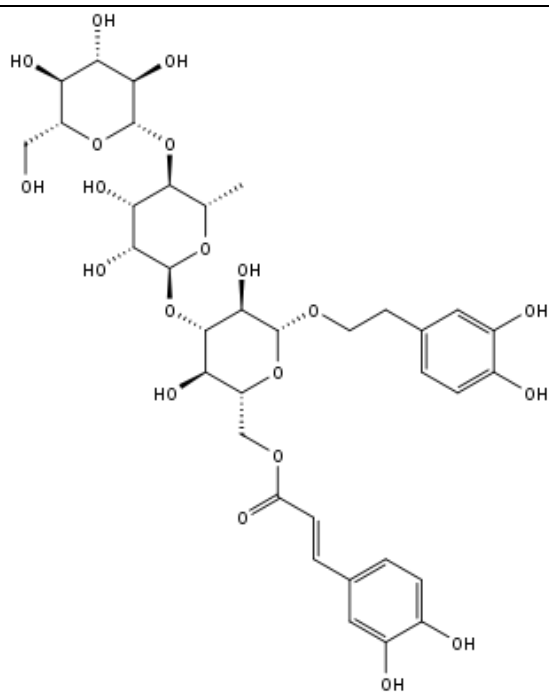

| Code   | Compound    | Reference            | Molecular Weight (Da) |
|--------|-------------|----------------------|-----------------------|
| PG_543 | Scrosides A | (compound 85) – (26) | 830.783               |

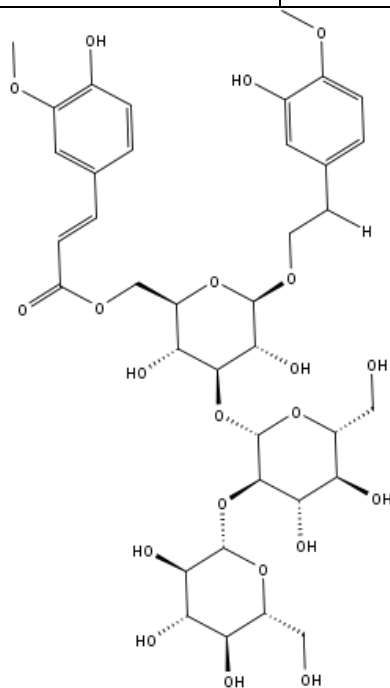

| Code   | Compound                          | Reference       | Molecular Weight (Da) |
|--------|-----------------------------------|-----------------|-----------------------|
| PG_544 | 2-(4-Hydroxyphenyl)ethanol-3-O-β- | (compound 89) – | 462.446               |

|                                                                                      | Dglucopyranosyl-(1→6)-O-β-D-glucopyranoside | (26)                 |                       |
|--------------------------------------------------------------------------------------|---------------------------------------------|----------------------|-----------------------|
| 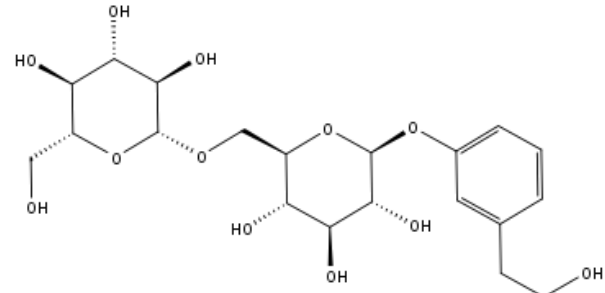   |                                             |                      |                       |
| Code                                                                                 | Compound                                    | Reference            | Molecular Weight (Da) |
| PG_545                                                                               | Forsythoside O                              | (compound 90) – (26) | 492.475               |
|   |                                             |                      |                       |
| Code                                                                                 | Compound                                    | Reference            | Molecular Weight (Da) |
| PG_546                                                                               | Forsythenside M                             | (compound 91) – (26) | 436.412               |
|  |                                             |                      |                       |
| Code                                                                                 | Compound                                    | Reference            | Molecular Weight (Da) |
| PG_547                                                                               | Forsythenside N                             | (compound 92) – (26) | 466.437               |
|  |                                             |                      |                       |



| Code                                                                                 | Compound                   | Reference            | Molecular Weight (Da) |
|--------------------------------------------------------------------------------------|----------------------------|----------------------|-----------------------|
| PG_548                                                                               | Rengyoside D               | (compound 93) – (26) | 470.469               |
| 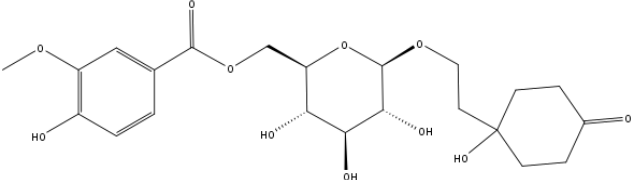   |                            |                      |                       |
| Code                                                                                 | Compound                   | Reference            | Molecular Weight (Da) |
| PG_549                                                                               | Rengyoside E               | (compound 94) – (26) | 466.481               |
|   |                            |                      |                       |
| Code                                                                                 | Compound                   | Reference            | Molecular Weight (Da) |
| PG_550                                                                               | 3'-O-Methyl isocrenatoside | (compound 95) – (26) | 636.601               |
|  |                            |                      |                       |
| Code                                                                                 | Compound                   | Reference            | Molecular Weight (Da) |
| PG_551                                                                               | Forsyoxasides A            | (compound 96) – (26) | 622.574               |

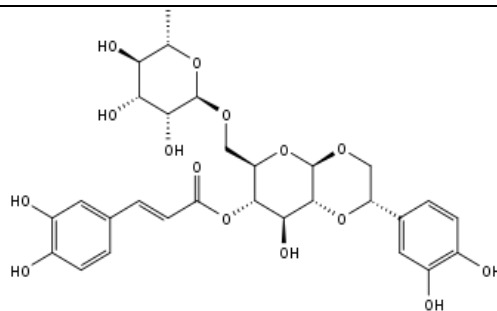

| Code   | Compound         | Reference            | Molecular Weight (Da) |
|--------|------------------|----------------------|-----------------------|
| PG_552 | Forsyoaxasides B | (compound 97) – (26) | 622.574               |

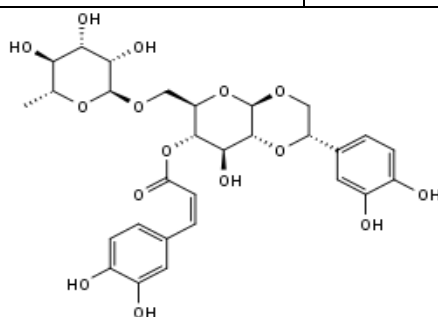

| Code   | Compound         | Reference            | Molecular Weight (Da) |
|--------|------------------|----------------------|-----------------------|
| PG_553 | Forsyoaxasides C | (compound 98) – (26) | 606.575               |

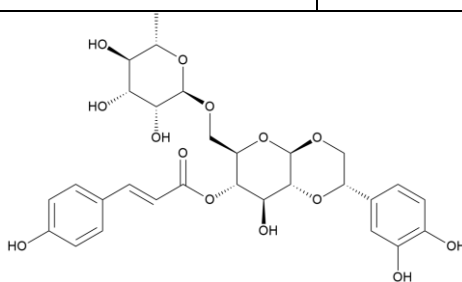

| Code   | Compound         | Reference           | Molecular Weight (Da) |
|--------|------------------|---------------------|-----------------------|
| PG_554 | Forsyoaxasides D | (compound 99) – 29] | 608.547               |

| 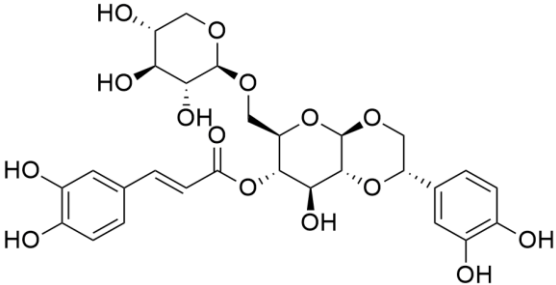   |                 |                       |                       |
|--------------------------------------------------------------------------------------|-----------------|-----------------------|-----------------------|
| Code                                                                                 | Compound        | Reference             | Molecular Weight (Da) |
| PG_555                                                                               | Forsyoxasides E | (compound 100) – (26) | 608.547               |
|   |                 |                       |                       |
| Code                                                                                 | Compound        | Reference             | Molecular Weight (Da) |
| PG_556                                                                               | Forsyoxasides F | (compound 101) - (26) | 476.433               |
|  |                 |                       |                       |
| Code                                                                                 | Compound        | Reference             | Molecular Weight (Da) |
| PG_557                                                                               | Betonyosides B  | (compound 102) – (26) | 654.616               |

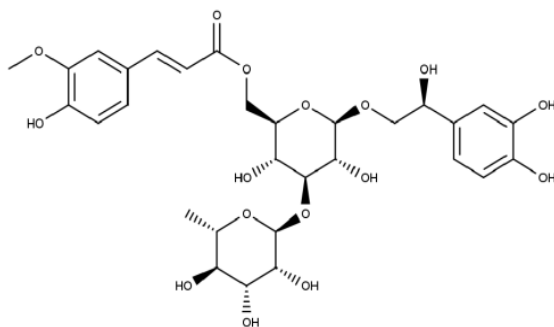

| Code   | Compound       | Reference             | Molecular Weight (Da) |
|--------|----------------|-----------------------|-----------------------|
| PG_558 | Betonyosides C | (compound 103) - (26) | 654.616               |

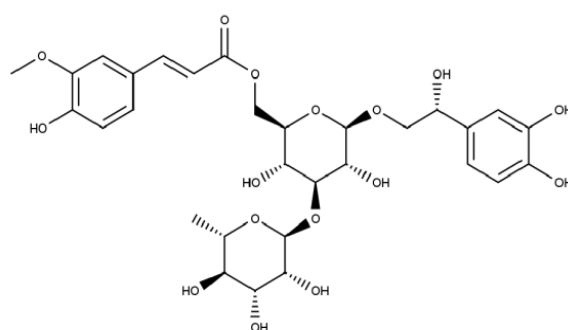

| Code   | Compound        | Reference             | Molecular Weight (Da) |
|--------|-----------------|-----------------------|-----------------------|
| PG_559 | Nepetifosides I | (compound 104) - (26) | 788.746               |

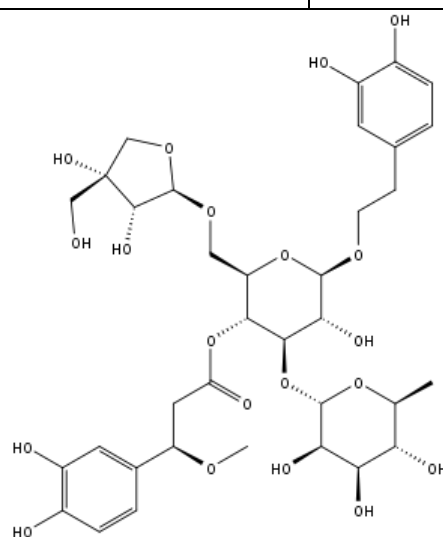

| Code | Compound | Reference | Molecular Weight (Da) |
|------|----------|-----------|-----------------------|
|      |          |           |                       |

|                                                                                                                                                                                                                                                                                                                                                                                                                                                                                                                                                                                                                                                                                                                                                                                                                |                    |                          |                          |
|----------------------------------------------------------------------------------------------------------------------------------------------------------------------------------------------------------------------------------------------------------------------------------------------------------------------------------------------------------------------------------------------------------------------------------------------------------------------------------------------------------------------------------------------------------------------------------------------------------------------------------------------------------------------------------------------------------------------------------------------------------------------------------------------------------------|--------------------|--------------------------|--------------------------|
| PG_560                                                                                                                                                                                                                                                                                                                                                                                                                                                                                                                                                                                                                                                                                                                                                                                                         | Nepetifosides J    | (compound 105) –<br>(26) | 788.746                  |
| 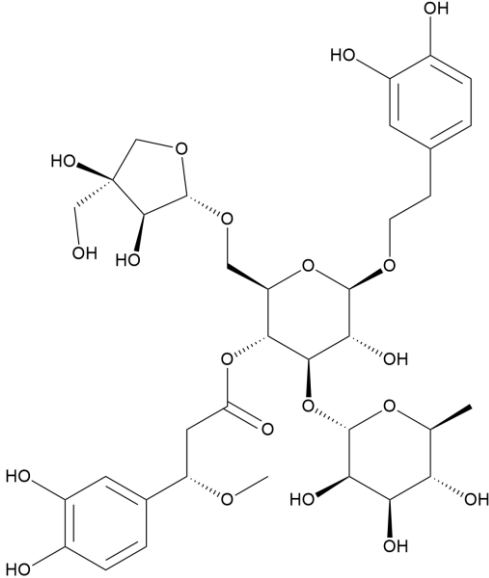 <p>The structure of Nepetifosides J is a complex polyphenolic glycoside. It features a central disaccharide core consisting of a glucose unit linked to a galactose unit. The glucose unit is substituted with a 3,4,5-trihydroxybenzyl group at the C2 position and a 3,4,5-trihydroxybenzyl group at the C6 position. The galactose unit is substituted with a 3,4,5-trihydroxybenzyl group at the C2 position and a 3,4,5-trihydroxybenzyl group at the C6 position. Additionally, the glucose unit has a 3,4,5-trihydroxybenzyl group at the C4 position. The galactose unit has a 3,4,5-trihydroxybenzyl group at the C4 position. The structure is highly symmetrical and contains multiple hydroxyl groups.</p>      |                    |                          |                          |
| Code                                                                                                                                                                                                                                                                                                                                                                                                                                                                                                                                                                                                                                                                                                                                                                                                           | Compound           | Reference                | Molecular Weight<br>(Da) |
| PG_561                                                                                                                                                                                                                                                                                                                                                                                                                                                                                                                                                                                                                                                                                                                                                                                                         | (7R)-Campneoside I | (compound 106) –<br>(26) | 668.643                  |
|  <p>The structure of (7R)-Campneoside I is a complex polyphenolic glycoside. It features a central disaccharide core consisting of a glucose unit linked to a galactose unit. The glucose unit is substituted with a 3,4,5-trihydroxybenzyl group at the C2 position and a 3,4,5-trihydroxybenzyl group at the C6 position. The galactose unit is substituted with a 3,4,5-trihydroxybenzyl group at the C2 position and a 3,4,5-trihydroxybenzyl group at the C6 position. Additionally, the glucose unit has a 3,4,5-trihydroxybenzyl group at the C4 position. The galactose unit has a 3,4,5-trihydroxybenzyl group at the C4 position. The structure is highly symmetrical and contains multiple hydroxyl groups.</p> |                    |                          |                          |
| Code                                                                                                                                                                                                                                                                                                                                                                                                                                                                                                                                                                                                                                                                                                                                                                                                           | Compound           | Reference                | Molecular Weight<br>(Da) |
| PG_562                                                                                                                                                                                                                                                                                                                                                                                                                                                                                                                                                                                                                                                                                                                                                                                                         | (7S)-Campneoside I | (compound 107) –<br>(26) | 682.669                  |
|  <p>The structure of (7S)-Campneoside I is a complex polyphenolic glycoside. It features a central disaccharide core consisting of a glucose unit linked to a galactose unit. The glucose unit is substituted with a 3,4,5-trihydroxybenzyl group at the C2 position and a 3,4,5-trihydroxybenzyl group at the C6 position. The galactose unit is substituted with a 3,4,5-trihydroxybenzyl group at the C2 position and a 3,4,5-trihydroxybenzyl group at the C6 position. Additionally, the glucose unit has a 3,4,5-trihydroxybenzyl group at the C4 position. The galactose unit has a 3,4,5-trihydroxybenzyl group at the C4 position. The structure is highly symmetrical and contains multiple hydroxyl groups.</p> |                    |                          |                          |

| Code                                                                                 | Compound             | Reference             | Molecular Weight (Da) |
|--------------------------------------------------------------------------------------|----------------------|-----------------------|-----------------------|
| PG_563                                                                               | Nepetifosides A      | (compound 108) – (26) | 650.628               |
| 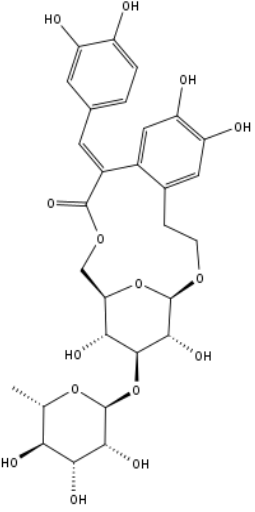    |                      |                       |                       |
| Code                                                                                 | Compound             | Reference             | Molecular Weight (Da) |
| PG_564                                                                               | Glucooleoacteoside   | (compound 109) – (26) | 1161.11               |
|  |                      |                       |                       |
| Code                                                                                 | Compound             | Reference             | Molecular Weight (Da) |
| PG_565                                                                               | Forsythenethosides A | (compound 110) – (26) | 766.746               |

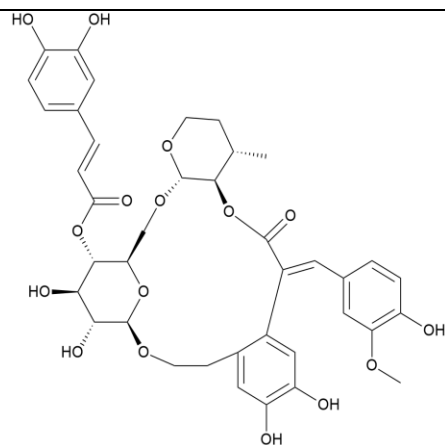

| Code   | Compound             | Reference             | Molecular Weight (Da) |
|--------|----------------------|-----------------------|-----------------------|
| PG_566 | Forsythenethosides B | (compound 111) – (26) | 796.772               |

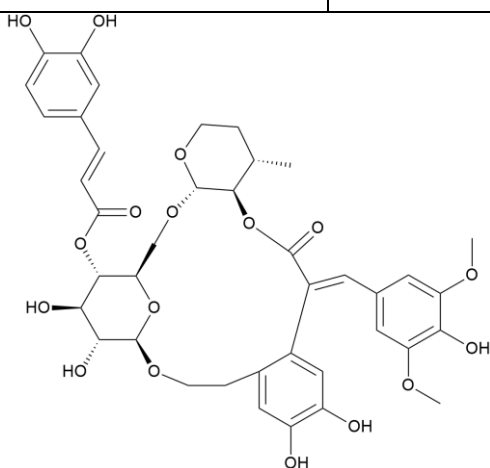

**Table S2:** The top 80 phenylethanoid glycosides (PG) filtered by the penalty score below 0.3 against 3C1<sup>pro</sup> of SARS-CoV-2.

| Classification |               |                    |                  | Individual Consensus Score |                    |                  | Penalty Score |
|----------------|---------------|--------------------|------------------|----------------------------|--------------------|------------------|---------------|
| PG             | AutoDock Vina | GOLD/<br>GoldScore | GOLD/<br>ChemPLP | AutoDock Vina              | GOLD/<br>GoldScore | GOLD/<br>ChemPLP |               |
| PG_441         | 18            | 1                  | 10               | 0,031578947                | 0,001754386        | 0,01754386       | 0,016959064   |
| PG_183         | 36            | 8                  | 1                | 0,063157895                | 0,014035088        | 0,001754386      | 0,026315789   |
| PG_100         | 9             | 6                  | 44               | 0,015789474                | 0,010526316        | 0,077192982      | 0,034502924   |
| PG_414         | 6             | 43                 | 26               | 0,010526316                | 0,075438596        | 0,045614035      | 0,043859649   |
| PG_214         | 72            | 23                 | 27               | 0,126315789                | 0,040350877        | 0,047368421      | 0,071345029   |
| PG_127         | 55            | 64                 | 43               | 0,096491228                | 0,112280702        | 0,075438596      | 0,094736842   |
| PG_442         | 139           | 18                 | 8                | 0,243859649                | 0,031578947        | 0,014035088      | 0,096491228   |
| PG_6           | 51            | 72                 | 87               | 0,089473684                | 0,126315789        | 0,152631579      | 0,122807018   |
| PG_224         | 12            | 139                | 70               | 0,021052632                | 0,243859649        | 0,122807018      | 0,129239766   |
| PG_251         | 60            | 16                 | 146              | 0,105263158                | 0,028070175        | 0,256140351      | 0,129824561   |
| PG_266         | 77            | 51                 | 98               | 0,135087719                | 0,089473684        | 0,171929825      | 0,132163743   |
| PG_523         | 32            | 65                 | 131              | 0,056140351                | 0,114035088        | 0,229824561      | 0,133333333   |
| PG_98          | 91            | 21                 | 126              | 0,159649123                | 0,036842105        | 0,221052632      | 0,139181287   |
| PG_382         | 5             | 49                 | 187              | 0,00877193                 | 0,085964912        | 0,328070175      | 0,140935673   |
| PG_436         | 41            | 190                | 15               | 0,071929825                | 0,333333333        | 0,026315789      | 0,143859649   |
| PG_369         | 26            | 7                  | 217              | 0,045614035                | 0,012280702        | 0,380701754      | 0,14619883    |
| PG_96          | 53            | 47                 | 154              | 0,092982456                | 0,08245614         | 0,270175439      | 0,148538012   |
| PG_215         | 73            | 89                 | 100              | 0,128070175                | 0,156140351        | 0,175438596      | 0,153216374   |
| PG_445         | 176           | 40                 | 55               | 0,30877193                 | 0,070175439        | 0,096491228      | 0,158479532   |
| PG_304         | 97            | 20                 | 161              | 0,170175439                | 0,035087719        | 0,28245614       | 0,162573099   |
| PG_254         | 39            | 171                | 74               | 0,068421053                | 0,3                | 0,129824561      | 0,166081871   |
| PG_435         | 138           | 141                | 6                | 0,242105263                | 0,247368421        | 0,010526316      | 0,166666667   |
| PG_48          | 116           | 81                 | 92               | 0,203508772                | 0,142105263        | 0,161403509      | 0,169005848   |
| PG_150         | 22            | 125                | 144              | 0,038596491                | 0,219298246        | 0,252631579      | 0,170175439   |
| PG_199         | 37            | 61                 | 202              | 0,064912281                | 0,107017544        | 0,354385965      | 0,175438596   |
| PG_103         | 54            | 215                | 31               | 0,094736842                | 0,377192982        | 0,054385965      | 0,175438596   |
| PG_216         | 38            | 236                | 34               | 0,066666667                | 0,414035088        | 0,059649123      | 0,180116959   |
| PG_26          | 153           | 96                 | 59               | 0,268421053                | 0,168421053        | 0,103508772      | 0,180116959   |
| PG_205         | 58            | 67                 | 190              | 0,101754386                | 0,11754386         | 0,333333333      | 0,184210526   |
| PG_434         | 137           | 197                | 5                | 0,240350877                | 0,345614035        | 0,00877193       | 0,198245614   |
| PG_244         | 47            | 207                | 86               | 0,08245614                 | 0,363157895        | 0,150877193      | 0,198830409   |
| PG_377         | 131           | 26                 | 184              | 0,229824561                | 0,045614035        | 0,322807018      | 0,199415205   |
| PG_209         | 245           | 79                 | 18               | 0,429824561                | 0,138596491        | 0,031578947      | 0,2           |
| PG_160         | 146           | 126                | 75               | 0,256140351                | 0,221052632        | 0,131578947      | 0,202923977   |
| PG_141         | 289           | 36                 | 22               | 0,507017544                | 0,063157895        | 0,038596491      | 0,202923977   |
| PG_429         | 263           | 3                  | 84               | 0,461403509                | 0,005263158        | 0,147368421      | 0,204678363   |
| PG_430         | 48            | 90                 | 226              | 0,084210526                | 0,157894737        | 0,396491228      | 0,212865497   |
| PG_121         | 111           | 107                | 152              | 0,194736842                | 0,187719298        | 0,266666667      | 0,216374269   |
| PG_426         | 213           | 55                 | 103              | 0,373684211                | 0,096491228        | 0,180701754      | 0,216959064   |
| PG_446         | 140           | 158                | 76               | 0,245614035                | 0,277192982        | 0,133333333      | 0,21871345    |
| PG_219         | 74            | 291                | 9                | 0,129824561                | 0,510526316        | 0,015789474      | 0,21871345    |
| PG_483         | 20            | 230                | 125              | 0,035087719                | 0,403508772        | 0,219298246      | 0,219298246   |
| PG_145         | 196           | 35                 | 147              | 0,343859649                | 0,061403509        | 0,257894737      | 0,221052632   |
| PG_107         | 223           | 29                 | 129              | 0,39122807                 | 0,050877193        | 0,226315789      | 0,222807018   |
| PG_389         | 62            | 320                | 3                | 0,10877193                 | 0,561403509        | 0,005263158      | 0,225146199   |
| PG_99          | 236           | 95                 | 54               | 0,414035088                | 0,166666667        | 0,094736842      | 0,225146199   |
| PG_188         | 293           | 37                 | 60               | 0,514035088                | 0,064912281        | 0,105263158      | 0,228070175   |
| PG_359         | 17            | 92                 | 289              | 0,029824561                | 0,161403509        | 0,507017544      | 0,232748538   |
| PG_437         | 314           | 75                 | 12               | 0,550877193                | 0,131578947        | 0,021052632      | 0,234502924   |
| PG_342         | 305           | 76                 | 23               | 0,535087719                | 0,133333333        | 0,040350877      | 0,23625731    |
| PG_184         | 244           | 144                | 17               | 0,428070175                | 0,252631579        | 0,029824561      | 0,236842105   |
| PG_462         | 82            | 106                | 218              | 0,143859649                | 0,185964912        | 0,38245614       | 0,237426901   |
| PG_137         | 160           | 30                 | 220              | 0,280701754                | 0,052631579        | 0,385964912      | 0,239766082   |
| PG_324         | 98            | 118                | 198              | 0,171929825                | 0,207017544        | 0,347368421      | 0,242105263   |
| PG_185         | 95            | 183                | 141              | 0,166666667                | 0,321052632        | 0,247368421      | 0,24502924    |
| PG_567         | 28            | 216                | 180              | 0,049122807                | 0,378947368        | 0,315789474      | 0,247953216   |
| PG_1           | 43            | 109                | 274              | 0,075438596                | 0,19122807         | 0,480701754      | 0,249122807   |



|            |     |     |     |             |             |             |             |
|------------|-----|-----|-----|-------------|-------------|-------------|-------------|
| PG_359-cis | 112 | 82  | 237 | 0,196491228 | 0,143859649 | 0,415789474 | 0,252046784 |
| PG_119     | 8   | 213 | 212 | 0,014035088 | 0,373684211 | 0,371929825 | 0,253216374 |
| PG_189     | 378 | 2   | 53  | 0,663157895 | 0,003508772 | 0,092982456 | 0,253216374 |
| PG_232     | 166 | 10  | 260 | 0,29122807  | 0,01754386  | 0,456140351 | 0,25497076  |
| PG_109     | 276 | 33  | 130 | 0,484210526 | 0,057894737 | 0,228070175 | 0,256725146 |
| PG_486     | 101 | 48  | 291 | 0,177192982 | 0,084210526 | 0,510526316 | 0,257309942 |
| PG_407     | 175 | 180 | 88  | 0,307017544 | 0,315789474 | 0,154385965 | 0,259064327 |
| PG_166     | 163 | 173 | 110 | 0,285964912 | 0,303508772 | 0,192982456 | 0,260818713 |
| PG_424     | 30  | 133 | 287 | 0,052631579 | 0,233333333 | 0,503508772 | 0,263157895 |
| PG_106     | 237 | 136 | 89  | 0,415789474 | 0,238596491 | 0,156140351 | 0,270175439 |
| PG_97      | 287 | 108 | 69  | 0,503508772 | 0,189473684 | 0,121052632 | 0,271345029 |
| PG_120     | 341 | 103 | 21  | 0,598245614 | 0,180701754 | 0,036842105 | 0,271929825 |
| PG_398     | 210 | 24  | 233 | 0,368421053 | 0,042105263 | 0,40877193  | 0,273099415 |
| PG_155     | 162 | 66  | 239 | 0,284210526 | 0,115789474 | 0,419298246 | 0,273099415 |
| PG_231     | 75  | 257 | 138 | 0,131578947 | 0,450877193 | 0,242105263 | 0,274853801 |
| PG_101     | 145 | 132 | 193 | 0,254385965 | 0,231578947 | 0,338596491 | 0,274853801 |
| PG_228     | 24  | 237 | 215 | 0,042105263 | 0,415789474 | 0,377192982 | 0,278362573 |
| PG_113     | 193 | 233 | 50  | 0,338596491 | 0,40877193  | 0,087719298 | 0,278362573 |
| PG_92      | 118 | 223 | 139 | 0,207017544 | 0,39122807  | 0,243859649 | 0,280701754 |
| PG_164     | 291 | 127 | 72  | 0,510526316 | 0,222807018 | 0,126315789 | 0,286549708 |
| PG_158     | 419 | 25  | 52  | 0,735087719 | 0,043859649 | 0,09122807  | 0,29005848  |
| PG_493     | 150 | 268 | 81  | 0,263157895 | 0,470175439 | 0,142105263 | 0,291812865 |
| PG_147     | 93  | 329 | 83  | 0,163157895 | 0,577192982 | 0,145614035 | 0,295321637 |

**Table S3:** The top 98 phenylethanoid glycosides (PG) filtered by the penalty score below 0.3 against PL<sup>pro</sup> of SARS-CoV-2.

| PG       | Classification |                |              | Individual Consensus Score |                |              | Penalty Score |
|----------|----------------|----------------|--------------|----------------------------|----------------|--------------|---------------|
|          | AutoDock Vina  | GOLD/GoldScore | GOLD/ChemPLP | AutoDock Vina              | GOLD/GoldScore | GOLD/ChemPLP |               |
| PG_78    | 31             | 8              | 3            | 0,05                       | 0,01           | 0,01         | 0,025         |
| PG_514   | 14             | 74             | 16           | 0,02                       | 0,13           | 0,03         | 0,061         |
| PG_21    | 37             | 43             | 46           | 0,06                       | 0,08           | 0,08         | 0,074         |
| PG_348   | 62             | 38             | 36           | 0,11                       | 0,07           | 0,06         | 0,08          |
| PG_513   | 129            | 6              | 2            | 0,23                       | 0,01           | 0            | 0,08          |
| PG_447   | 70             | 94             | 1            | 0,12                       | 0,16           | 0            | 0,096         |
| PG_262   | 29             | 77             | 61           | 0,05                       | 0,14           | 0,11         | 0,098         |
| PG_444   | 84             | 50             | 38           | 0,15                       | 0,09           | 0,07         | 0,101         |
| PG_44    | 66             | 62             | 51           | 0,12                       | 0,11           | 0,09         | 0,105         |
| PG_454   | 11             | 5              | 167          | 0,02                       | 0,01           | 0,29         | 0,107         |
| PG_328   | 80             | 24             | 84           | 0,140350877                | 0,042105263    | 0,147368421  | 0,11          |
| PG_27    | 85             | 67             | 39           | 0,149122807                | 0,11754386     | 0,068421053  | 0,112         |
| PG_94    | 79             | 44             | 74           | 0,138596491                | 0,077192982    | 0,129824561  | 0,115         |
| PG_86    | 128            | 53             | 17           | 0,224561404                | 0,092982456    | 0,029824561  | 0,116         |
| PG_337   | 135            | 51             | 12           | 0,236842105                | 0,089473684    | 0,021052632  | 0,116         |
| PG_265   | 77             | 101            | 32           | 0,135087719                | 0,177192982    | 0,056140351  | 0,123         |
| PG_408   | 58             | 116            | 41           | 0,101754386                | 0,203508772    | 0,071929825  | 0,126         |
| PG_299   | 36             | 29             | 157          | 0,063157895                | 0,050877193    | 0,275438596  | 0,13          |
| PG_345   | 43             | 175            | 5            | 0,075438596                | 0,307017544    | 0,00877193   | 0,13          |
| PG_148   | 54             | 152            | 25           | 0,094736842                | 0,266666667    | 0,043859649  | 0,135         |
| PG_312   | 81             | 15             | 138          | 0,142105263                | 0,026315789    | 0,242105263  | 0,137         |
| PG_329   | 110            | 96             | 37           | 0,192982456                | 0,168421053    | 0,064912281  | 0,142         |
| PG_296   | 97             | 78             | 72           | 0,170175439                | 0,136842105    | 0,126315789  | 0,144         |
| PG_61    | 98             | 135            | 23           | 0,171929825                | 0,236842105    | 0,040350877  | 0,15          |
| PG_281   | 162            | 25             | 70           | 0,284210526                | 0,043859649    | 0,122807018  | 0,15          |
| PG_15    | 13             | 141            | 112          | 0,022807018                | 0,247368421    | 0,196491228  | 0,156         |
| PG_3     | 23             | 154            | 92           | 0,040350877                | 0,270175439    | 0,161403509  | 0,157         |
| PG_298   | 59             | 188            | 22           | 0,103508772                | 0,329824561    | 0,038596491  | 0,157         |
| PG_350   | 94             | 134            | 48           | 0,164912281                | 0,235087719    | 0,084210526  | 0,161         |
| PG_406   | 116            | 158            | 4            | 0,203508772                | 0,277192982    | 0,007017544  | 0,163         |
| PG_455   | 1              | 27             | 257          | 0,001754386                | 0,047368421    | 0,450877193  | 0,167         |
| PG_362   | 115            | 65             | 109          | 0,201754386                | 0,114035088    | 0,19122807   | 0,169         |
| PG_300   | 51             | 186            | 53           | 0,089473684                | 0,326315789    | 0,092982456  | 0,17          |
| PG_508   | 118            | 70             | 102          | 0,207017544                | 0,122807018    | 0,178947368  | 0,17          |
| PG_170   | 6              | 106            | 180          | 0,010526316                | 0,185964912    | 0,315789474  | 0,171         |
| PG_42    | 67             | 155            | 79           | 0,11754386                 | 0,271929825    | 0,138596491  | 0,176         |
| PG_503   | 144            | 57             | 118          | 0,252631579                | 0,1            | 0,207017544  | 0,187         |
| PG_31    | 210            | 92             | 18           | 0,368421053                | 0,161403509    | 0,031578947  | 0,187         |
| PG_35    | 71             | 184            | 65           | 0,124561404                | 0,322807018    | 0,114035088  | 0,187         |
| PG_465   | 134            | 126            | 63           | 0,235087719                | 0,221052632    | 0,110526316  | 0,189         |
| PG_136   | 187            | 22             | 115          | 0,328070175                | 0,038596491    | 0,201754386  | 0,189         |
| PG_261   | 61             | 191            | 76           | 0,107017544                | 0,335087719    | 0,133333333  | 0,192         |
| PG_399   | 49             | 118            | 162          | 0,085964912                | 0,207017544    | 0,284210526  | 0,192         |
| PG_11    | 73             | 144            | 116          | 0,128070175                | 0,252631579    | 0,203508772  | 0,195         |
| PG_139   | 18             | 168            | 150          | 0,031578947                | 0,294736842    | 0,263157895  | 0,196         |
| PG_201   | 142            | 99             | 107          | 0,249122807                | 0,173684211    | 0,187719298  | 0,204         |
| PG_197   | 234            | 16             | 100          | 0,410526316                | 0,028070175    | 0,175438596  | 0,205         |
| PG_534   | 311            | 10             | 34           | 0,545614035                | 0,01754386     | 0,059649123  | 0,208         |
| PG_457   | 33             | 148            | 175          | 0,057894737                | 0,259649123    | 0,307017544  | 0,208         |
| PG_129   | 356            | 1              | 9            | 0,624561404                | 0,001754386    | 0,015789474  | 0,214         |
| PG_308   | 17             | 200            | 152          | 0,029824561                | 0,350877193    | 0,266666667  | 0,216         |
| PG_354   | 86             | 149            | 134          | 0,150877193                | 0,261403509    | 0,235087719  | 0,216         |
| PG_314   | 24             | 244            | 104          | 0,042105263                | 0,428070175    | 0,18245614   | 0,218         |
| PG_17    | 19             | 227            | 127          | 0,033333333                | 0,398245614    | 0,222807018  | 0,218         |
| PG_222   | 151            | 56             | 170          | 0,264912281                | 0,098245614    | 0,298245614  | 0,22          |
| PG_343-1 | 149            | 102            | 130          | 0,261403509                | 0,178947368    | 0,228070175  | 0,223         |
| PG_363   | 295            | 34             | 57           | 0,51754386                 | 0,059649123    | 0,1          | 0,226         |

|        |     |     |     |             |             |             |       |
|--------|-----|-----|-----|-------------|-------------|-------------|-------|
| PG_364 | 171 | 37  | 182 | 0,3         | 0,064912281 | 0,319298246 | 0,228 |
| PG_38  | 106 | 231 | 56  | 0,185964912 | 0,405263158 | 0,098245614 | 0,23  |
| PG_413 | 229 | 97  | 68  | 0,401754386 | 0,170175439 | 0,119298246 | 0,23  |
| PG_37  | 104 | 239 | 54  | 0,18245614  | 0,419298246 | 0,094736842 | 0,232 |
| PG_516 | 4   | 114 | 279 | 0,007017544 | 0,2         | 0,489473684 | 0,232 |
| PG_528 | 335 | 42  | 26  | 0,587719298 | 0,073684211 | 0,045614035 | 0,236 |
| PG_138 | 341 | 35  | 28  | 0,598245614 | 0,061403509 | 0,049122807 | 0,236 |
| PG_271 | 9   | 241 | 154 | 0,015789474 | 0,422807018 | 0,270175439 | 0,236 |
| PG_518 | 99  | 110 | 195 | 0,173684211 | 0,192982456 | 0,342105263 | 0,236 |
| PG_380 | 28  | 111 | 268 | 0,049122807 | 0,194736842 | 0,470175439 | 0,238 |
| PG_234 | 69  | 182 | 158 | 0,121052632 | 0,319298246 | 0,277192982 | 0,239 |
| PG_245 | 350 | 11  | 62  | 0,614035088 | 0,019298246 | 0,10877193  | 0,247 |
| PG_71  | 39  | 160 | 228 | 0,068421053 | 0,280701754 | 0,4         | 0,25  |
| PG_460 | 22  | 376 | 29  | 0,038596491 | 0,659649123 | 0,050877193 | 0,25  |
| PG_467 | 91  | 162 | 178 | 0,159649123 | 0,284210526 | 0,312280702 | 0,252 |
| PG_456 | 26  | 7   | 399 | 0,045614035 | 0,012280702 | 0,7         | 0,253 |
| PG_25  | 20  | 209 | 204 | 0,035087719 | 0,366666667 | 0,357894737 | 0,253 |
| PG_374 | 113 | 40  | 284 | 0,198245614 | 0,070175439 | 0,498245614 | 0,256 |
| PG_14  | 63  | 247 | 129 | 0,110526316 | 0,433333333 | 0,226315789 | 0,257 |
| PG_263 | 159 | 180 | 108 | 0,278947368 | 0,315789474 | 0,189473684 | 0,261 |
| PG_566 | 27  | 23  | 398 | 0,047368421 | 0,040350877 | 0,698245614 | 0,262 |
| PG_131 | 296 | 73  | 83  | 0,519298246 | 0,128070175 | 0,145614035 | 0,264 |
| PG_375 | 170 | 120 | 169 | 0,298245614 | 0,210526316 | 0,296491228 | 0,268 |
| PG_128 | 179 | 86  | 198 | 0,314035088 | 0,150877193 | 0,347368421 | 0,271 |
| PG_87  | 340 | 93  | 33  | 0,596491228 | 0,163157895 | 0,057894737 | 0,273 |
| PG_541 | 30  | 417 | 21  | 0,052631579 | 0,731578947 | 0,036842105 | 0,274 |
| PG_502 | 140 | 107 | 224 | 0,245614035 | 0,187719298 | 0,392982456 | 0,275 |
| PG_397 | 328 | 72  | 77  | 0,575438596 | 0,126315789 | 0,135087719 | 0,279 |
| PG_192 | 7   | 323 | 147 | 0,012280702 | 0,566666667 | 0,257894737 | 0,279 |
| PG_422 | 147 | 198 | 136 | 0,257894737 | 0,347368421 | 0,238596491 | 0,281 |
| PG_132 | 302 | 33  | 148 | 0,529824561 | 0,057894737 | 0,259649123 | 0,282 |
| PG_114 | 417 | 28  | 40  | 0,731578947 | 0,049122807 | 0,070175439 | 0,284 |
| PG_372 | 245 | 26  | 217 | 0,429824561 | 0,045614035 | 0,380701754 | 0,285 |
| PG_550 | 48  | 177 | 263 | 0,084210526 | 0,310526316 | 0,461403509 | 0,285 |
| PG_207 | 231 | 171 | 89  | 0,405263158 | 0,3         | 0,156140351 | 0,287 |
| PG_60  | 455 | 4   | 35  | 0,798245614 | 0,007017544 | 0,061403509 | 0,289 |
| PG_340 | 251 | 226 | 31  | 0,440350877 | 0,396491228 | 0,054385965 | 0,297 |
| PG_20  | 87  | 240 | 183 | 0,152631579 | 0,421052632 | 0,321052632 | 0,298 |
| PG_67  | 220 | 179 | 111 | 0,385964912 | 0,314035088 | 0,194736842 | 0,298 |
| PG_565 | 35  | 55  | 420 | 0,061403509 | 0,096491228 | 0,736842105 | 0,298 |
| PG_512 | 122 | 131 | 259 | 0,214035088 | 0,229824561 | 0,454385965 | 0,299 |

**Table S4:** ADMETox parameters evaluated for the seven phenylethanoid glycosides (PG) that showed interaction with SARS-CoV-2 proteases predicted by SwissADME, pkCSM and DataWarrior.

| PG     | Consensus Log P |        |       | Rotatable bonds |       | PAINS  | AMES  | Mutagenic | Tumorigenic |
|--------|-----------------|--------|-------|-----------------|-------|--------|-------|-----------|-------------|
|        | Swiss.          | pkCSM  | DW    | Swiss.          | pkCSM | Swiss. | pkCSM | DW        | DW          |
| PG_78  | -0,71           | -1,40  | -0,71 | 11              | 10    | 1      | No    | No        | No          |
| PG_348 | 0,06            | 0,28   | -0,11 | 10              | 9     | 1      | No    | No        | No          |
| PG_447 | -0,01           | -0,99  | -0,64 | 13              | 10    | 0      | No    | No        | No          |
| PG_514 | 0,70            | 0,32   | 0,75  | 13              | 11    | 1      | No    | No        | No          |
| PG_493 | -0,79           | -0,72  | -0,03 | 11              | 10    | 1      | No    | No        | No          |
| PG_254 | -0,54           | -10,16 | -0,38 | 11              | 10    | 1      | No    | No        | No          |
| PG_266 | -0,40           | -10,16 | -0,38 | 11              | 10    | 1      | No    | Low       | No          |

\*DW = DataWarrior

\*Swiss. = SwissADME

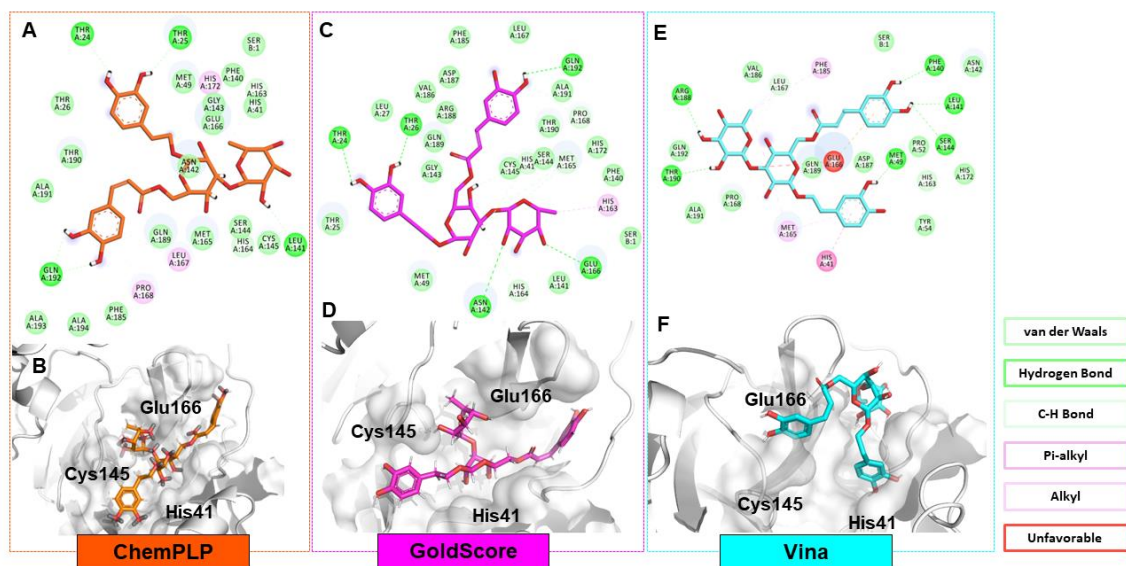

**Figure S 1:** Interactions between the 3CL<sup>PRO</sup> complex and PG\_254 A & B: In orange, the results referring to the ChemPLP algorithm. C&D: In magenta, results referring to GoldScore. E & F: In cyan, results referring to Autodock Vina.

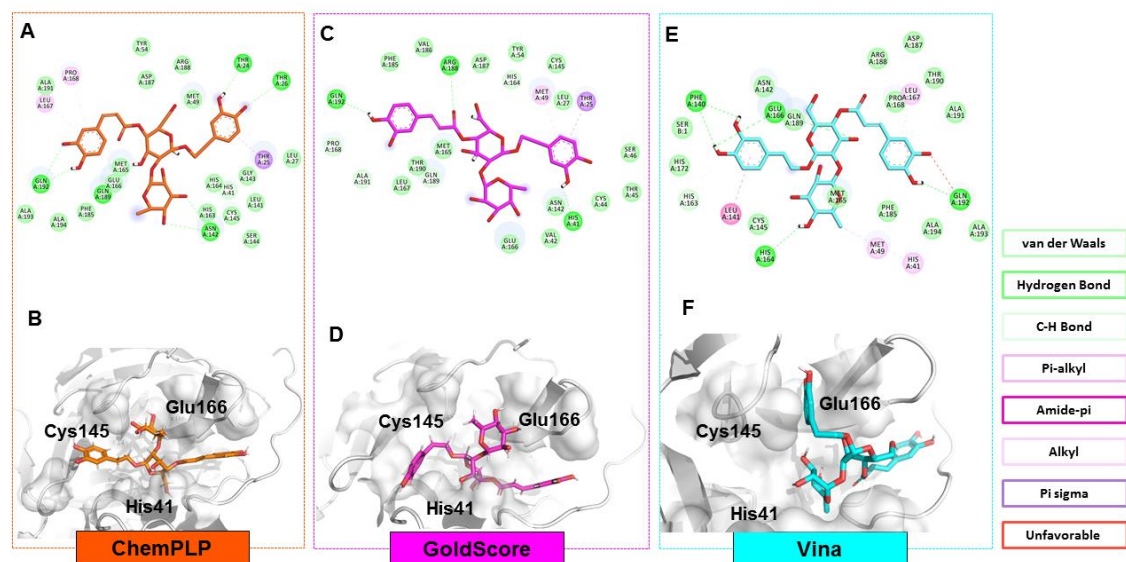

**Figure S 2:** Interactions between the 3CL<sup>PRO</sup> complex and PG\_266 A & B: In orange, the results referring to the ChemPLP algorithm. C&D: In magenta, results referring to GoldScore. E & F: In cyan, results referring to Autodock Vina.

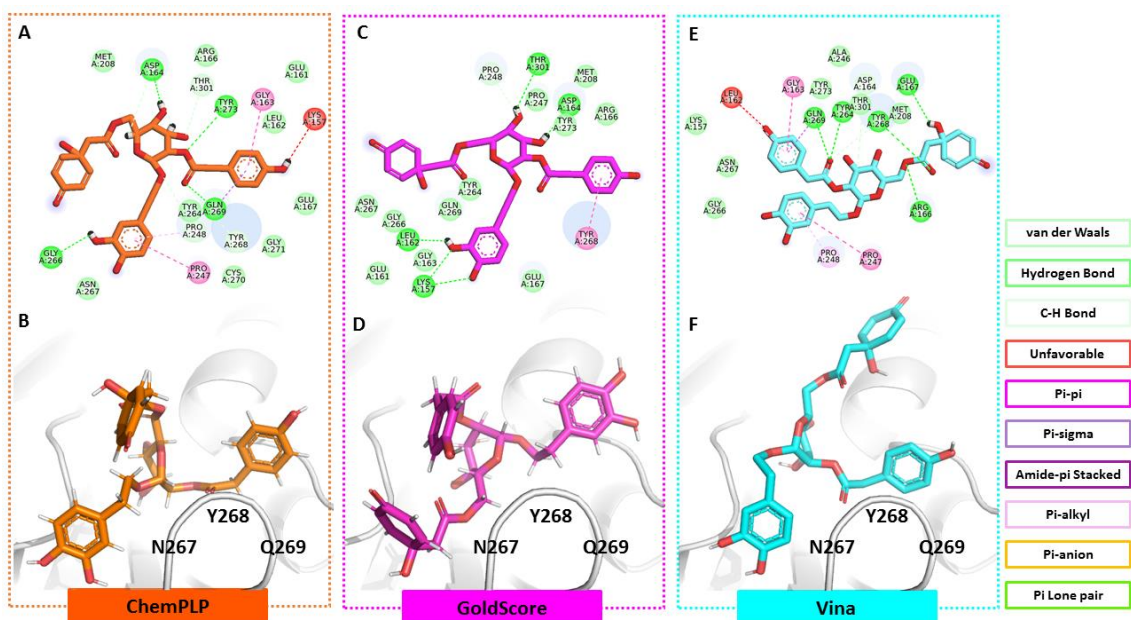

**Figure S 3:** Interactions between the PI<sup>pro</sup> complex and PG\_514 A & B: In orange, the results referring to the ChemPLP algorithm. C&D: In magenta, results referring to GoldScore. E & F: In cyan, results referring to Autodock Vina.

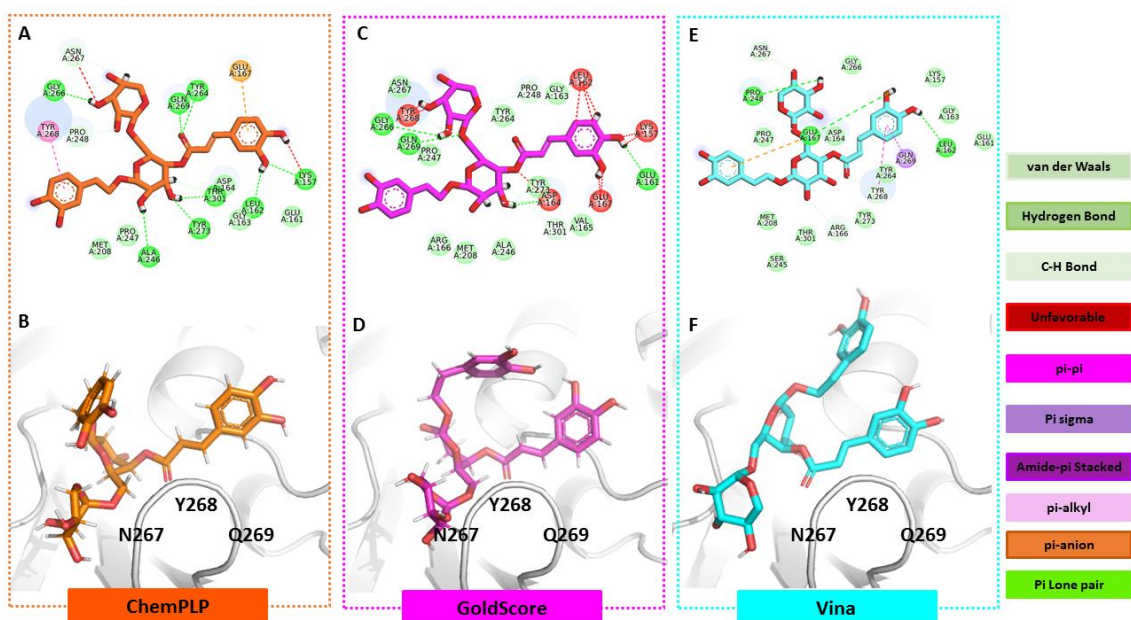

**Figure S 4:** Interactions between the PI<sup>pro</sup> complex and PG\_78 A & B: In orange, the results referring to the ChemPLP algorithm. C&D: In magenta, results referring to GoldScore. E & F: In cyan, results referring to Autodock Vina.



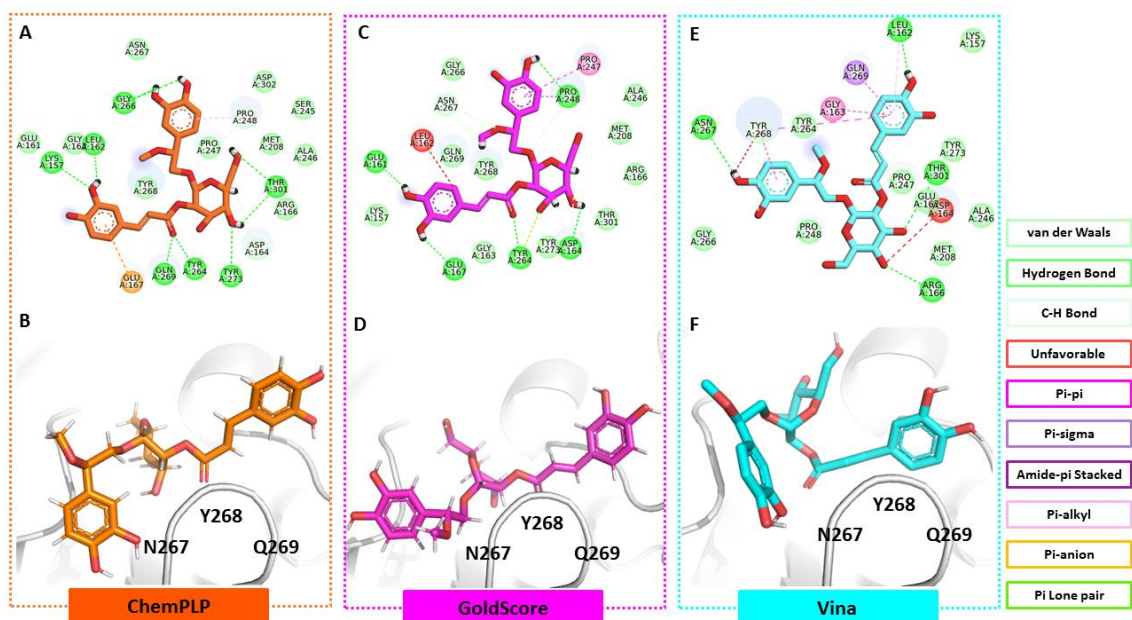

**Figure S 5:** Interactions between the PI<sup>pro</sup> complex and PG\_348 A & B: In orange, the results referring to the ChemPLP algorithm. C&D: In magenta, results referring to GoldScore. E & F: In cyan, results referring to Autodock Vina.

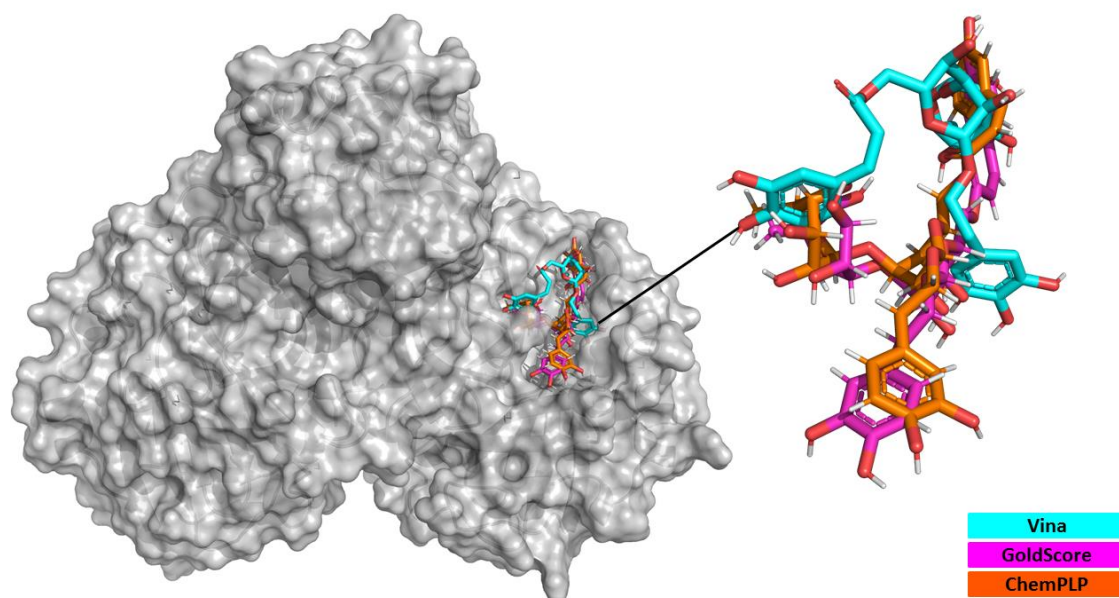

**Figure S 6:** PG\_254 modes overlay. The three-dimensional structure of 3CLpro (PDBid:6XQT) is colored in gray surface. The best modes of the PG resulted from AutoDock Vina (cyan), GOLD/GoldScore (magenta), GOLD/ChemPLP (orange) simulations are in the protease active site region. On the right is the highlight structure overlay.

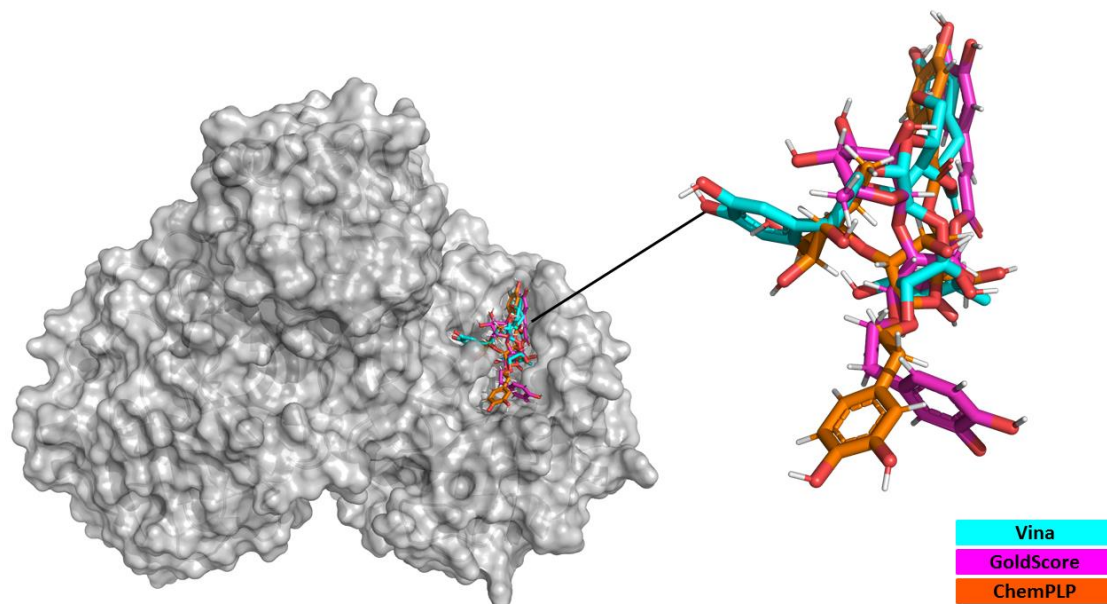

**Figure S 7:** PG\_266 modes overlay. The three-dimensional structure of 3CLpro (PDBid:6XQT) is colored in gray surface. The best modes of the PG resulted from AutoDock Vina (cyan), GOLD/GoldScore (magenta), GOLD/ChemPLP (orange) simulations are in the protease active site region. On the right is the highlight structure overlay.

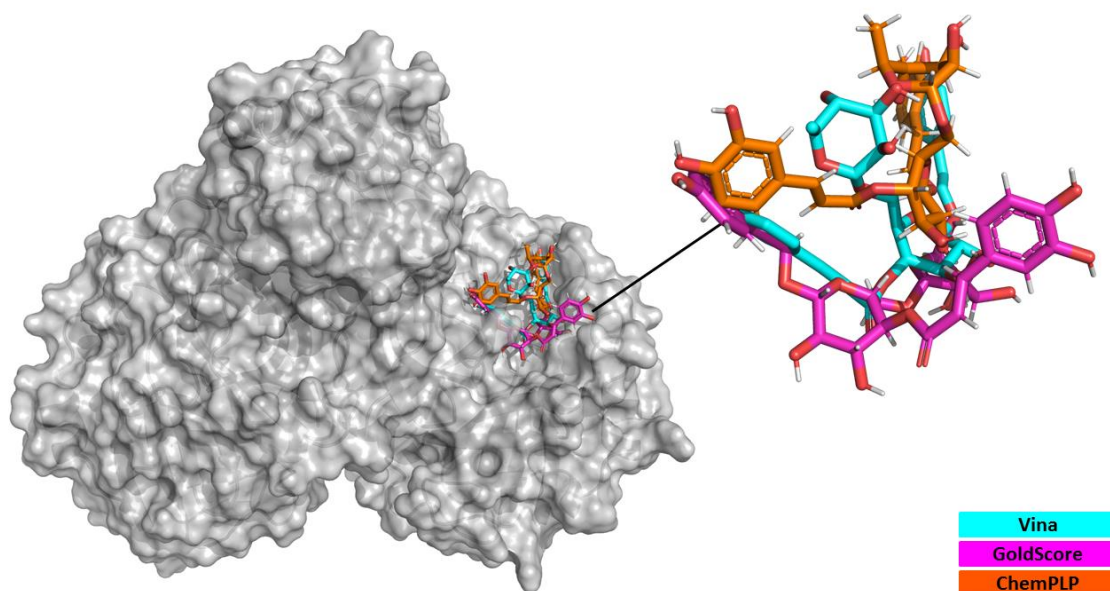

**Figure S 8:** PG\_493 modes overlay. The three-dimensional structure of 3CLpro (PDBid:6XQT) is colored in gray surface. The best modes of the PG resulted from AutoDock Vina (cyan), GOLD/GoldScore (magenta), GOLD/ChemPLP (orange) simulations are in the protease active site region. On the right is the highlight structure overlay.

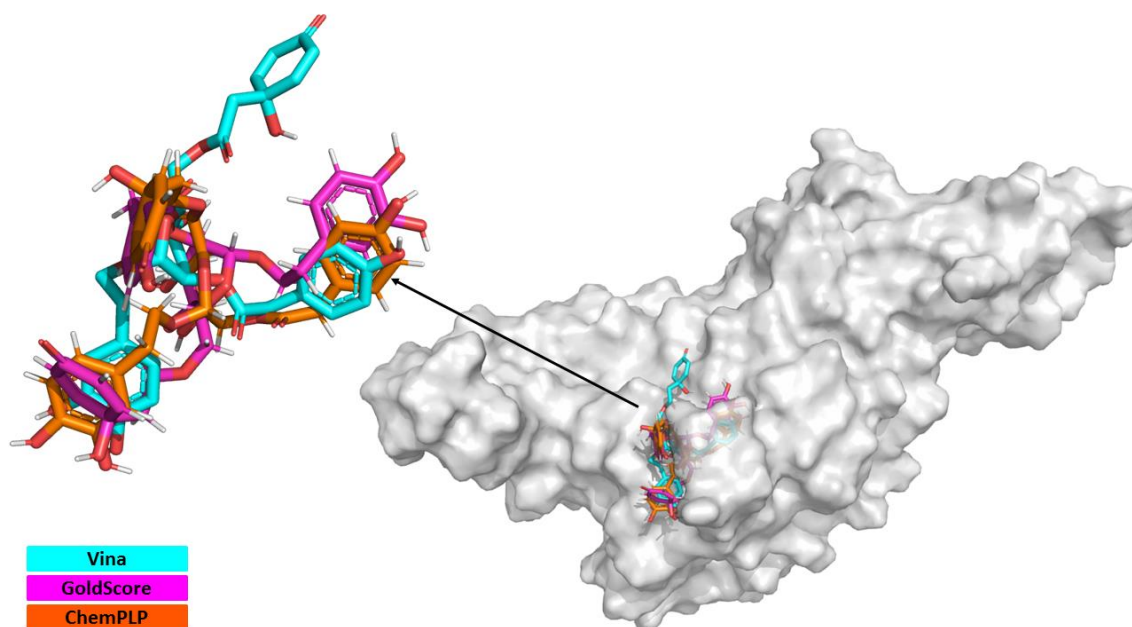

**Figure S 9:** PG\_514 modes overlay. The three-dimensional structure of PLpro (PDBid: 7JRN) is colored in gray surface. The best modes of the PG resulted from AutoDock Vina (cyan), GOLD/GoldScore (magenta), GOLD/ChemPLP (orange) simulations are in the BL2Loop region. On the left is the highlight structure overlay.

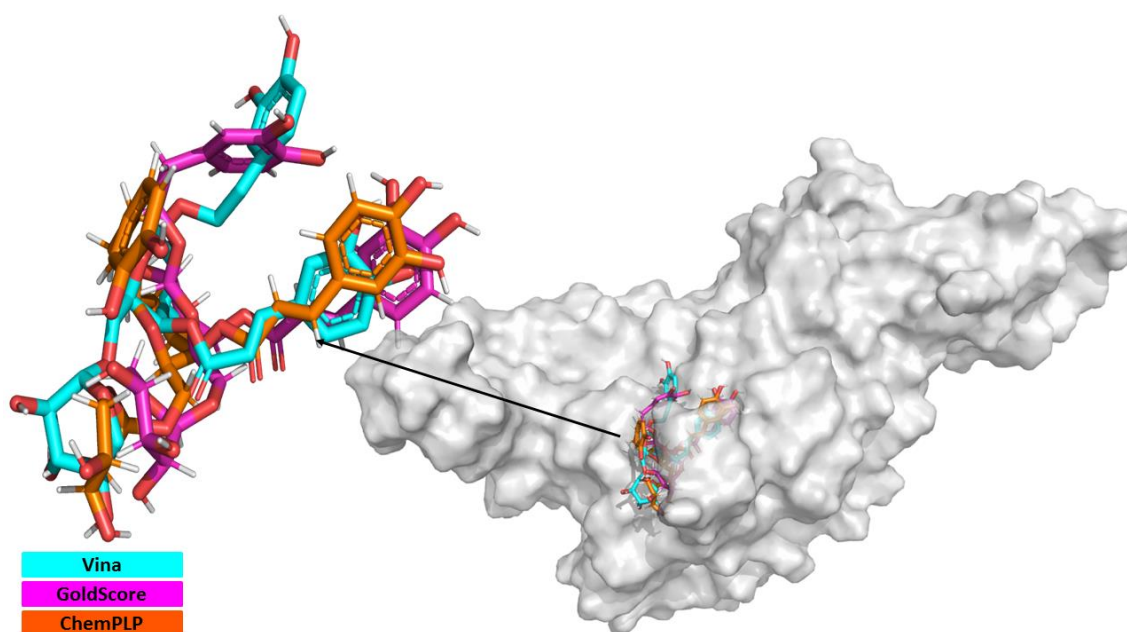

**Figure S 10:** PG\_78 modes overlay. The three-dimensional structure of PLpro (PDBid: 7JRN) is colored in gray surface. The best modes of the PG resulted from AutoDock Vina (cyan), GOLD/GoldScore (magenta), GOLD/ChemPLP (orange) simulations are in the BL2Loop region. On the left is the highlight structure overlay.



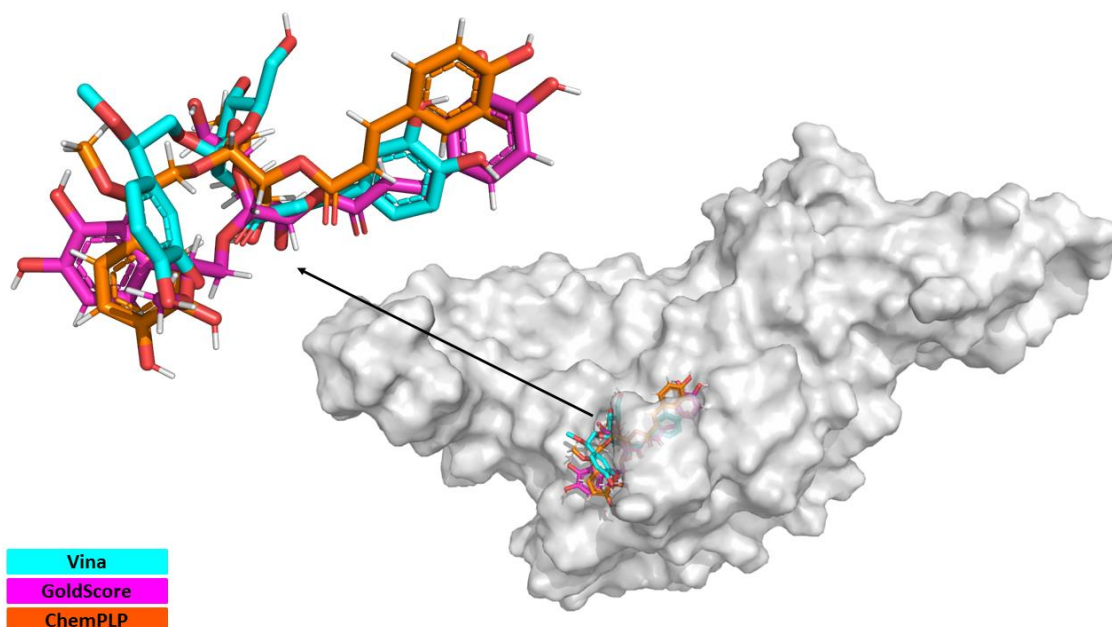

**Figure S 11:** PG\_348 modes overlay. The three-dimensional structure of PLpro (PDBid: 7JRN) is colored in gray surface. The best modes of the PG resulted from AutoDock Vina (cyan), GOLD/GoldScore (magenta), GOLD/ChemPLP (orange) simulations are in the BL2Loop region. On the left is the highlight structure overlay.

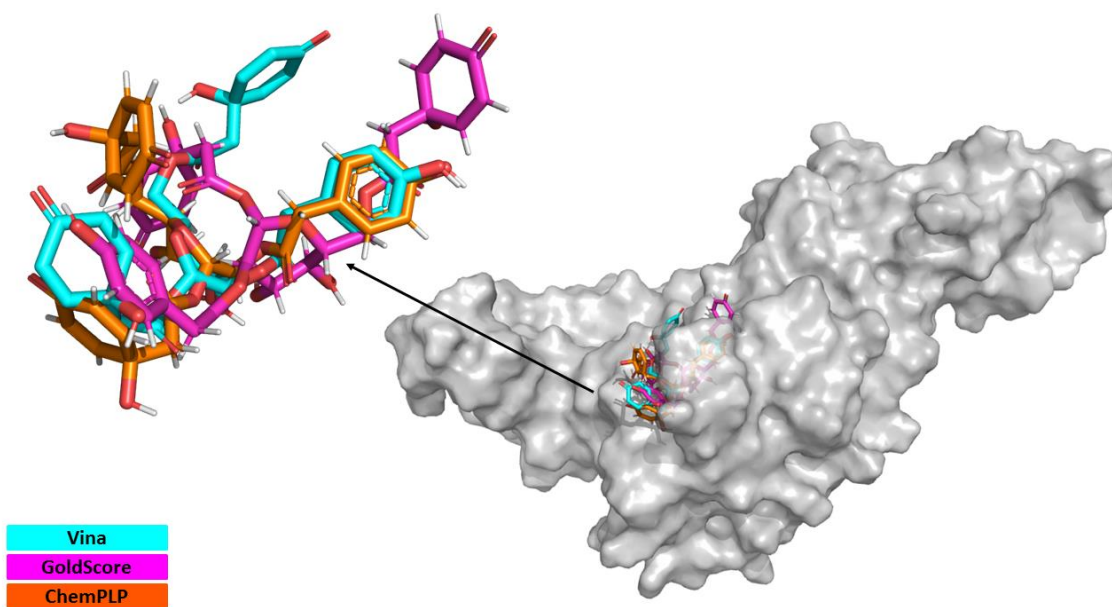

**Figure S 12:** PG\_447 modes overlay. The three-dimensional structure of PLpro (PDBid: 7JRN) is colored in gray surface. The best modes of the PG resulted from AutoDock Vina (cyan), GOLD/GoldScore (magenta), GOLD/ChemPLP (orange) simulations are in the BL2Loop region. On the left is the highlight structure overlay.
